# Supplementary material
Source: PubMed Central journal article supplement (PMC3171579)

# Creating Diverse Target-Binding Surfaces on FKBP12: Synthesis and Evaluation of a Rapamycin Analogue Library

Xianghong Wu,<sup>†</sup>Lisheng Wang,<sup>‡</sup> Yaohua Han,<sup>§</sup> Nicholas Regan,<sup>±</sup> Pui-Kai Li,<sup>±</sup> Miguel A. Villalona,<sup>&^</sup> Xiche Hu,<sup>§</sup> Roger Briesewitz,<sup>\*,‡,^</sup> Dehua Pei<sup>\*,†,^</sup>

## Supporting Information

### Table of Contents

|                                                                                                                         |    |
|-------------------------------------------------------------------------------------------------------------------------|----|
| <b>Figure S1.</b> <sup>1</sup> H NMR, <sup>13</sup> C NMR, and HR MS of Compounds <b>4</b> , <b>5</b> , and <b>3a-c</b> | 2  |
| <b>Figure S2.</b> ESI MS of Rapalogs <b>2a-y</b> in Table 1                                                             | 12 |
| <b>Figure S3.</b> MALDI-TOF MS of Rapalogs <b>11</b> in Table 2                                                         | 21 |
| <b>Figure S4.</b> MALDI-TOF MS of Rapalogs <b>12</b> in Table 2                                                         | 54 |
| <b>Figure S5.</b> Representative titration curves of FA competition assay of rapalogs                                   | 86 |

**Figure S1.**  $^1\text{H}$  NMR,  $^{13}\text{C}$  NMR, and High-Resolution MS of Compounds **4**, **5**, and **3a-c**

**Compound 4**

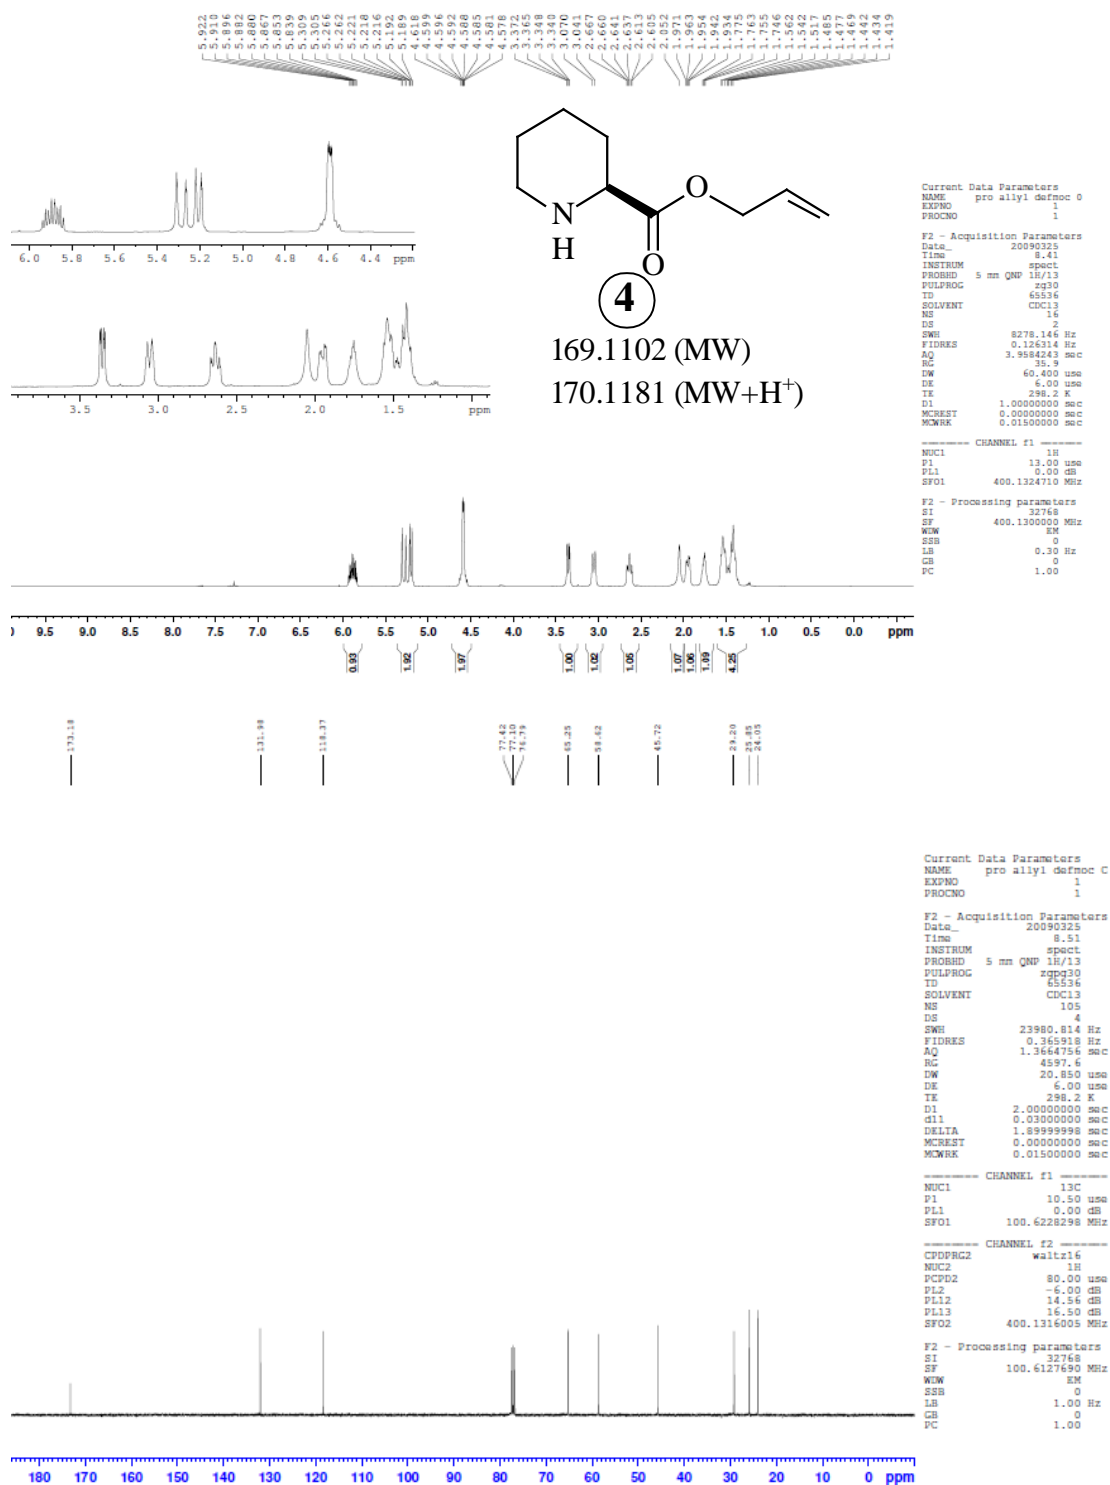

# Display Report

## Analysis Info

Analysis Name D:\Data\pe\lxwu\6 901029.d  
Method 75 to 200.m  
Sample Name  
Comment

Acquisition Date 10/29/2009 2:45:48 PM

Operator xwu  
Instrument / Ser# micrOTOF 194

## Acquisition Parameter

|             |         |                      |          |                  |           |
|-------------|---------|----------------------|----------|------------------|-----------|
| Source Type | ESI     | Ion Polarity         | Positive | Set Nebulizer    | 0.4 Bar   |
| Focus       | Active  |                      |          | Set Dry Heater   | 200 °C    |
| Scan Begin  | 50 m/z  | Set Capillary        | 4500 V   | Set Dry Gas      | 4.0 l/min |
| Scan End    | 300 m/z | Set End Plate Offset | -500 V   | Set Divert Valve | Waste     |

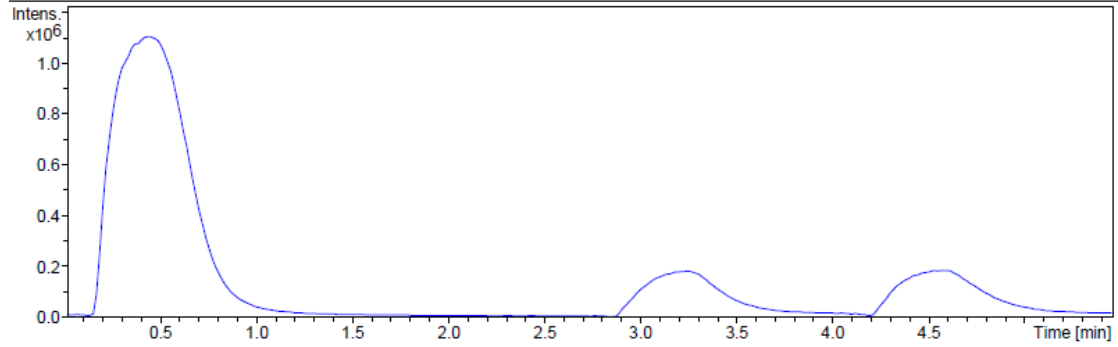

TIC +All MS

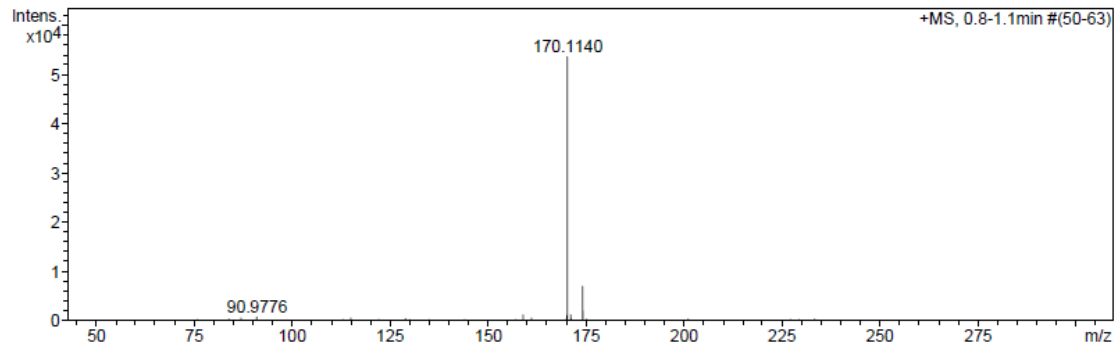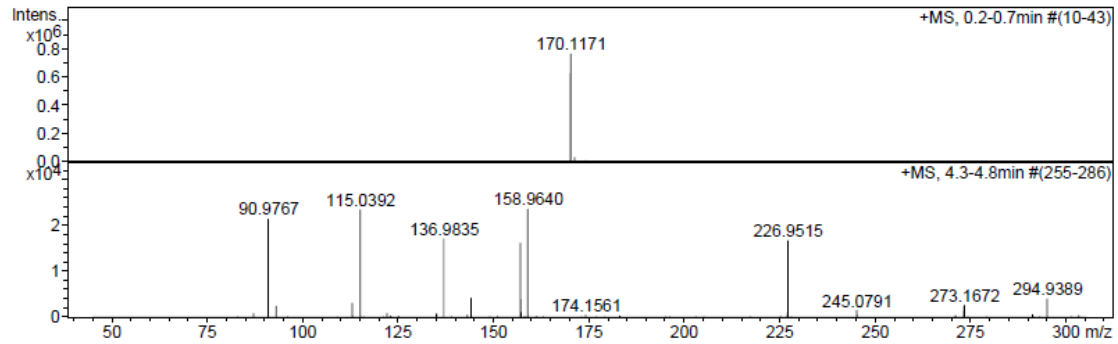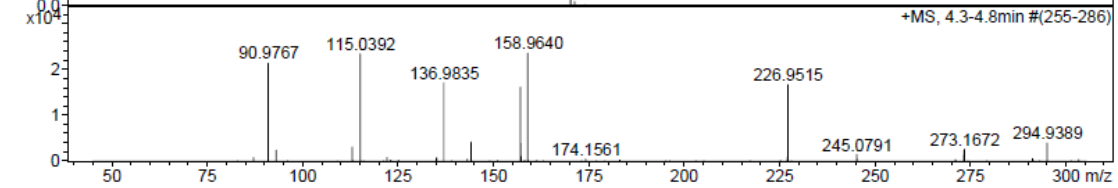

# Compound 5

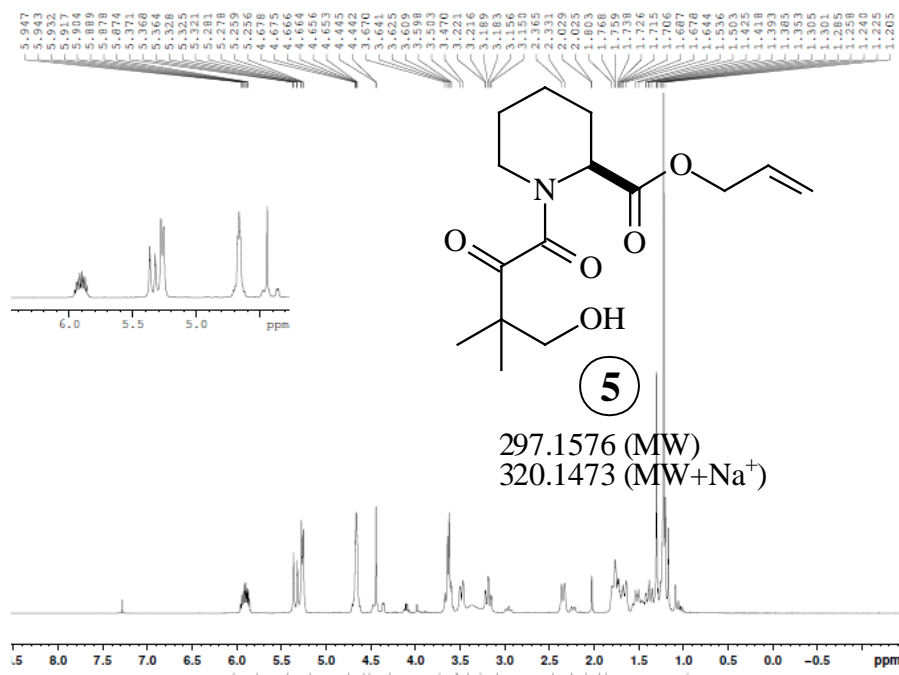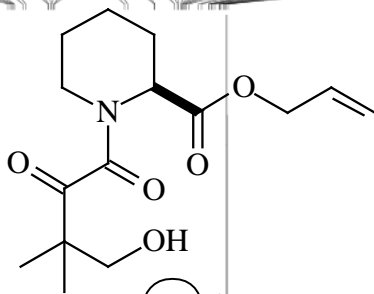

**5**  
297.1576 (MW)  
320.1473 (MW+Na<sup>+</sup>)

```
Current Data Parameters
NAME pro allyl democ a
EXPNO 1
PROCNO 1

F2 - Acquisition Parameters
Date_ 20090326
Time 15.27
INSTRUM spect
PROBHD 5 mm QNP 1H/13
PULPROG zgpg30
ID 65536
SOLVENT CDCl3
NS 16
DS 2
SWH 8278.146 Hz
FIDRES 0.126314 Hz
AQ 3.9584243 sec
RG 35.9
DW 60.400 usec
DE 6.00 usec
TE 298.2 K
D1 1.00000000 sec
MCREST 0.00000000 sec
MCWRR 0.01500000 sec

----- CHANNEL f1 -----
NUC1 1H
P1 13.00 usec
PL1 0.00 dB
SFO1 400.1324710 MHz

F2 - Processing parameters
SI 32768
SF 400.1300000 MHz
WDW EM
SSB 0
LB 0.30 Hz
GB 0
PC 1.40
```

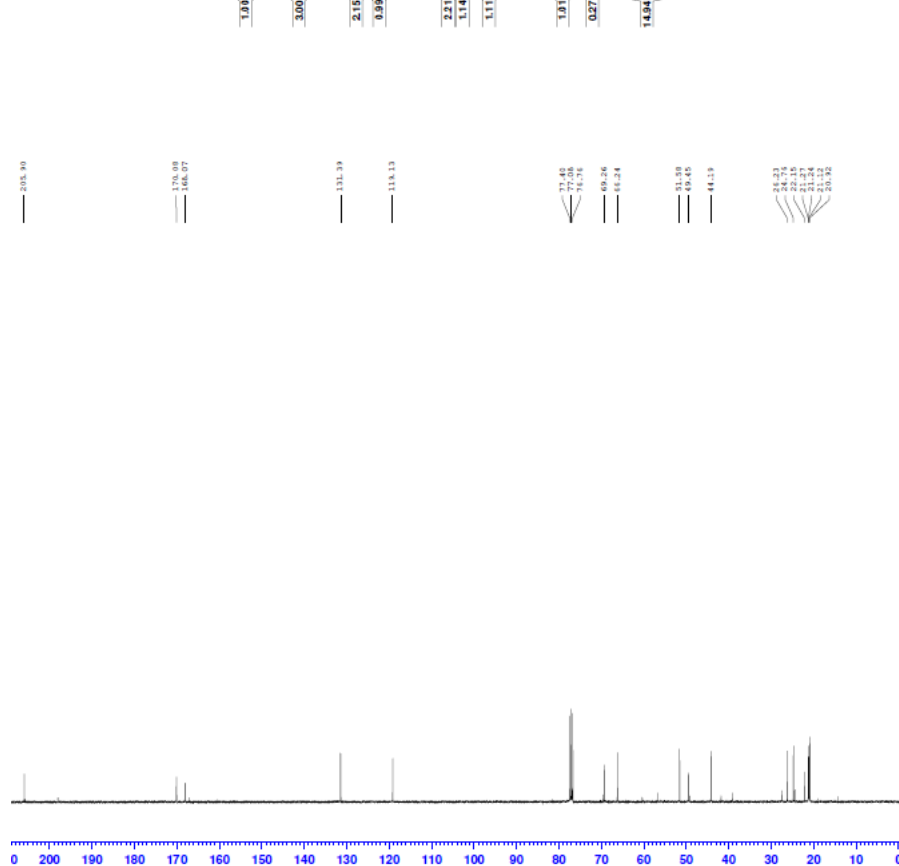

```
Current Data Parameters
NAME proallyl democacyl
EXPNO 1
PROCNO 1

F2 - Acquisition Parameters
Date_ 20090326
Time 15.36
INSTRUM spect
PROBHD 5 mm QNP 1H/13
PULPROG zgpg30
ID 65536
SOLVENT CDCl3
NS 207
DS 4
SWH 23980.814 Hz
FIDRES 0.365918 Hz
AQ 1.3664756 sec
RG 3251
DW 20.850 usec
DE 6.00 usec
TE 298.2 K
D1 2.00000000 sec
d11 0.03000000 sec
DELTA 1.89999999 sec
MCREST 0.00000000 sec
MCWRR 0.01500000 sec

----- CHANNEL f1 -----
NUC1 13C
P1 10.50 usec
PL1 0.00 dB
SFO1 100.6228298 MHz

----- CHANNEL f2 -----
CPDPRG2 waltz16
NUC2 1H
PCPD2 80.00 usec
PL2 -6.00 dB
PL12 14.56 dB
PL13 16.50 dB
SFO2 400.1316005 MHz

F2 - Processing parameters
SI 32768
SF 100.6127690 MHz
WDW EM
SSB 0
LB 1.00 Hz
GB 0
PC 1.00
```

# Display Report

## Analysis Info

Analysis Name D:\Data\pe\lxwu\7 901029.d  
Method 100 to 500.m  
Sample Name  
Comment

Acquisition Date 10/29/2009 2:53:05 PM

Operator xwu  
Instrument / Ser# micrOTOF 194

## Acquisition Parameter

|             |         |                      |          |                  |           |
|-------------|---------|----------------------|----------|------------------|-----------|
| Source Type | ESI     | Ion Polarity         | Positive | Set Nebulizer    | 0.4 Bar   |
| Focus       | Active  |                      |          | Set Dry Heater   | 200 °C    |
| Scan Begin  | 50 m/z  | Set Capillary        | 4500 V   | Set Dry Gas      | 4.0 l/min |
| Scan End    | 600 m/z | Set End Plate Offset | -500 V   | Set Divert Valve | Waste     |

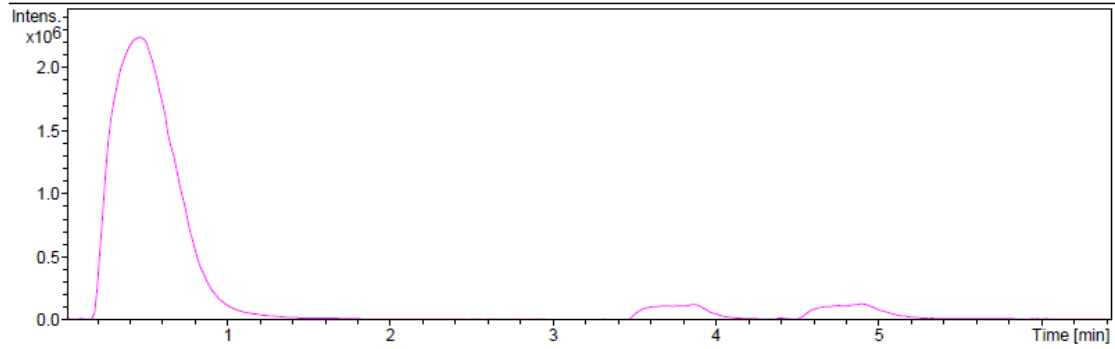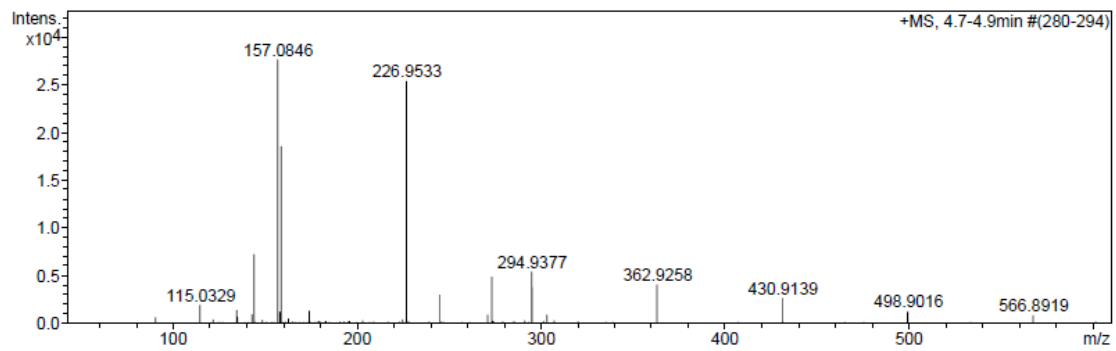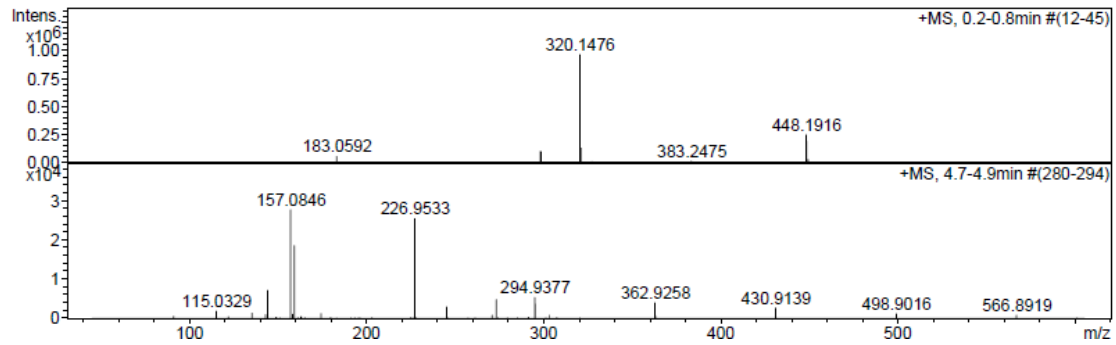

# Compound 3a

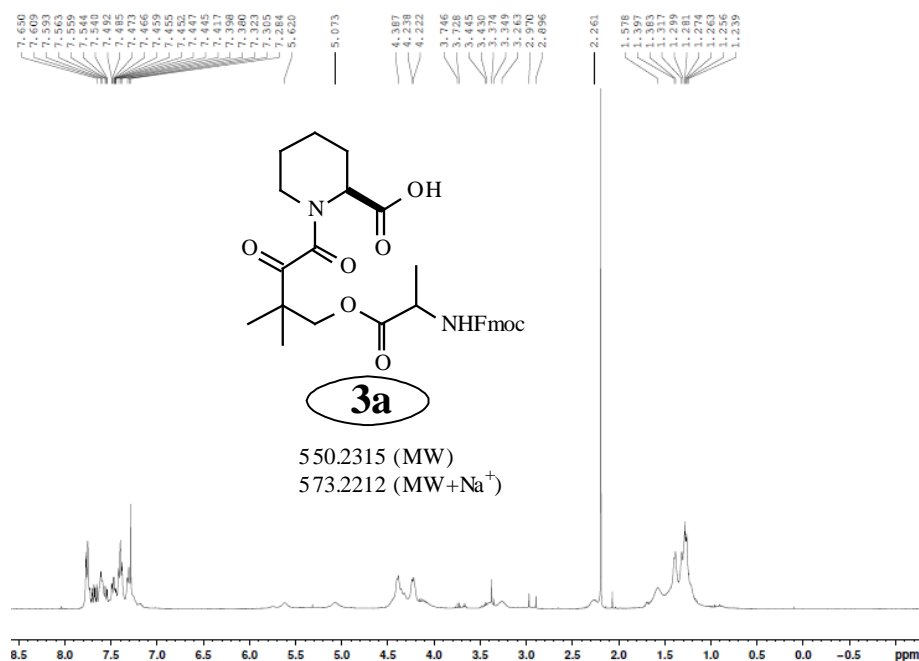

The Ohio State University  
Department of Chemistry  
NMR Facility  
400MHz - 0083

Current Data Parameters  
NAME prolaOH 091026  
EXPNO 1  
PROCNO 1

F2 - Acquisition Parameters  
Date\_ 20091026  
Time 15:07  
INSTRUM spect  
PROBHD 5 mm QNP 1H/13  
PULPROG zg30  
TD 65536  
SOLVENT CDCl3  
NS 16  
DS 2  
SWH 8278.146 Hz  
FIDRES 0.126314 Hz  
AQ 1.9584243 sec  
RG 128  
SW 60.400 usec  
DE 6.00 usec  
TE 300.2 K  
D1 1.00000000 sec  
TDO 1

CHANNEL f1  
NUC1 1H  
P1 13.00 usec  
PL1 0.00 dB  
SFO1 400.1324710 MHz

F2 - Processing parameters  
SI 32768  
SF 400.1300000 MHz  
WVW EM  
SEB 0  
LB 0.30 Hz  
GB 0  
PC 1.00

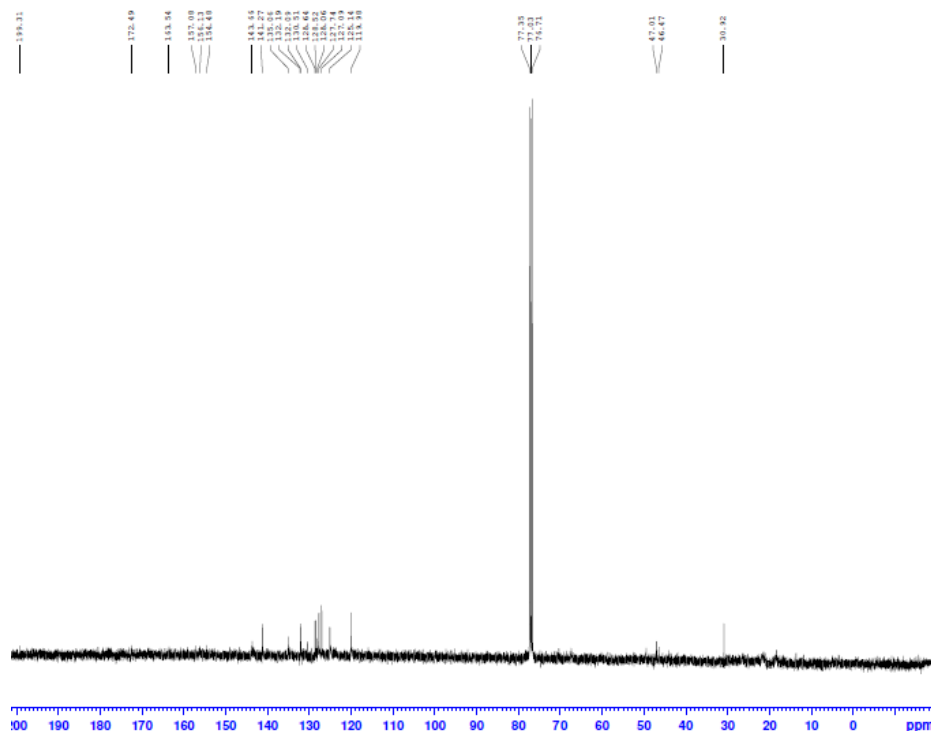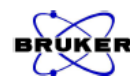

Current Data Parameters  
NAME prolaOH 091026 CN  
EXPNO 1  
PROCNO 1

F2 - Acquisition Parameters  
Date\_ 20091026  
Time 15:10  
INSTRUM spect  
PROBHD 5 mm QNP 1H/13  
PULPROG zgpg30  
TD 65536  
SOLVENT CDCl3  
NS 410  
DS 4  
SWH 23980.814 Hz  
FIDRES 0.365918 Hz  
AQ 1.3664756 sec  
RG 5160.6  
SW 20.850 usec  
DE 6.00 usec  
TE 300.2 K  
D1 2.00000000 sec  
d11 0.03000000 sec  
DELTA 1.89999998 sec  
TDO 1

CHANNEL f1  
NUC1 13C  
P1 10.50 usec  
PL1 0.00 dB  
SFO1 100.6228298 MHz

CHANNEL f2  
CPDPRG2 waltz16  
NUC2 1H  
PCPD2 80.00 usec  
PL2 -6.00 dB  
PL12 14.56 dB  
PL13 16.50 dB  
SFO2 400.1316005 MHz

F2 - Processing parameters  
SI 32768  
SF 100.6127690 MHz  
WVW EM  
SEB 0  
LB 1.00 Hz  
GB 0  
PC 1.00

# Display Report

## Analysis Info

Analysis Name D:\Data\peixwu\21-4 901029.d  
Method 300 to 900.m  
Sample Name  
Comment

Acquisition Date 10/29/2009 3:50:19 PM

Operator xwu  
Instrument / Ser# micrOTOF 194

## Acquisition Parameter

|             |          |                      |          |                  |           |
|-------------|----------|----------------------|----------|------------------|-----------|
| Source Type | ESI      | Ion Polarity         | Positive | Set Nebulizer    | 0.4 Bar   |
| Focus       | Active   |                      |          | Set Dry Heater   | 200 °C    |
| Scan Begin  | 200 m/z  | Set Capillary        | 4500 V   | Set Dry Gas      | 4.0 l/min |
| Scan End    | 1000 m/z | Set End Plate Offset | -500 V   | Set Divert Valve | Waste     |

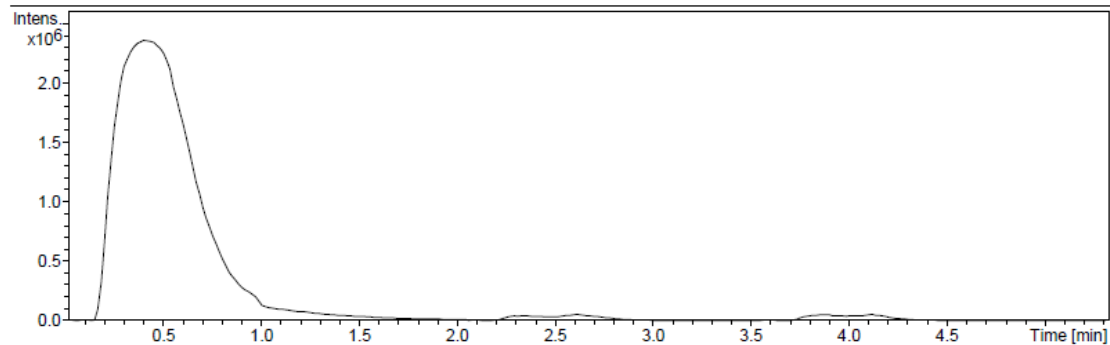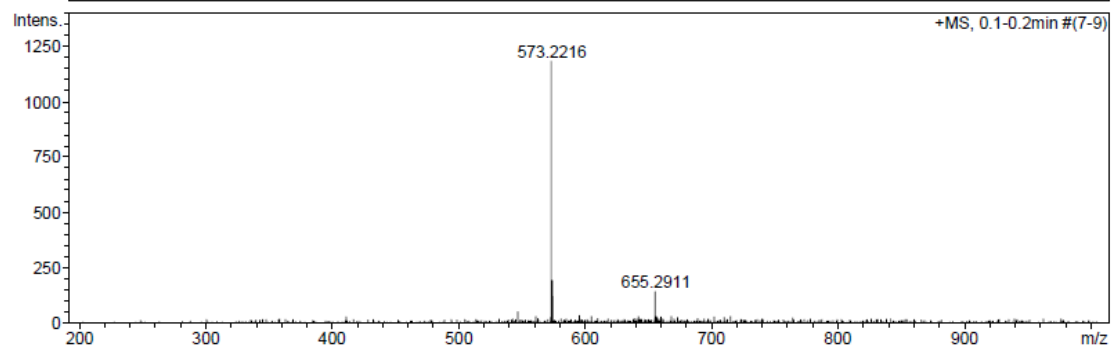

# Compound 3b

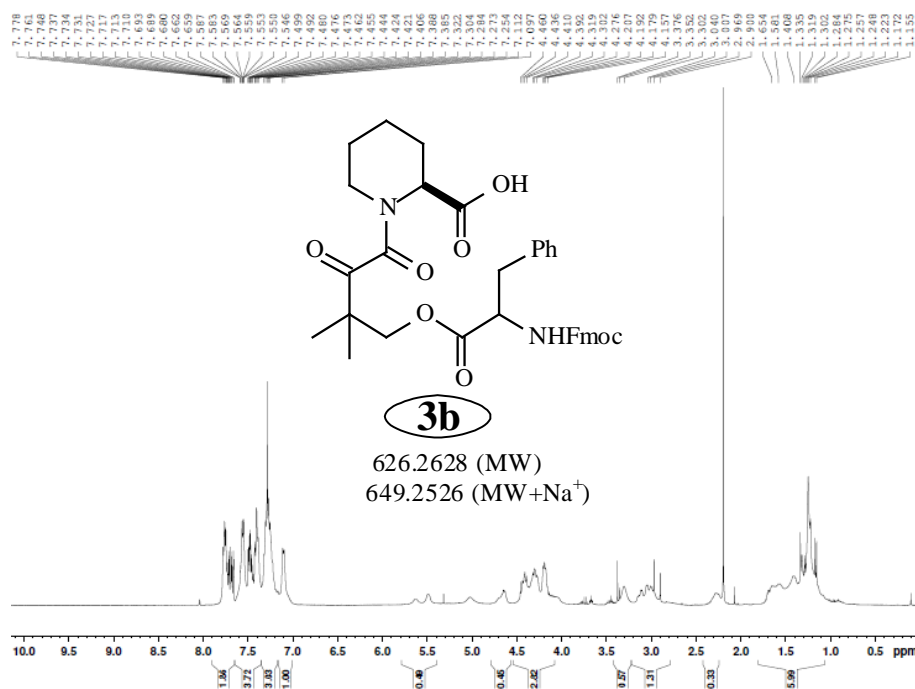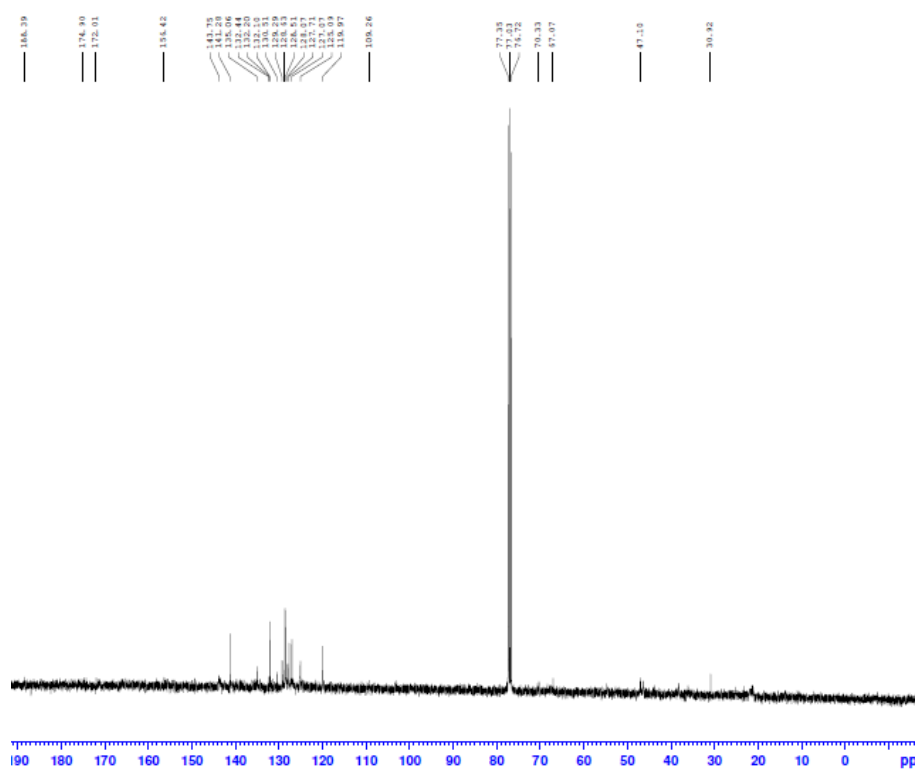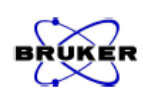



# Display Report

## Analysis Info

Analysis Name D:\Data\pel\wxu\21-3 901029.d  
Method 300 to 900.m  
Sample Name  
Comment

Acquisition Date 10/29/2009 3:42:03 PM

Operator xwu  
Instrument / Ser# micrOTOF 194

## Acquisition Parameter

|             |          |                      |          |                  |           |
|-------------|----------|----------------------|----------|------------------|-----------|
| Source Type | ESI      | Ion Polarity         | Positive | Set Nebulizer    | 0.4 Bar   |
| Focus       | Active   |                      |          | Set Dry Heater   | 200 °C    |
| Scan Begin  | 200 m/z  | Set Capillary        | 4500 V   | Set Dry Gas      | 4.0 l/min |
| Scan End    | 1000 m/z | Set End Plate Offset | -500 V   | Set Divert Valve | Waste     |

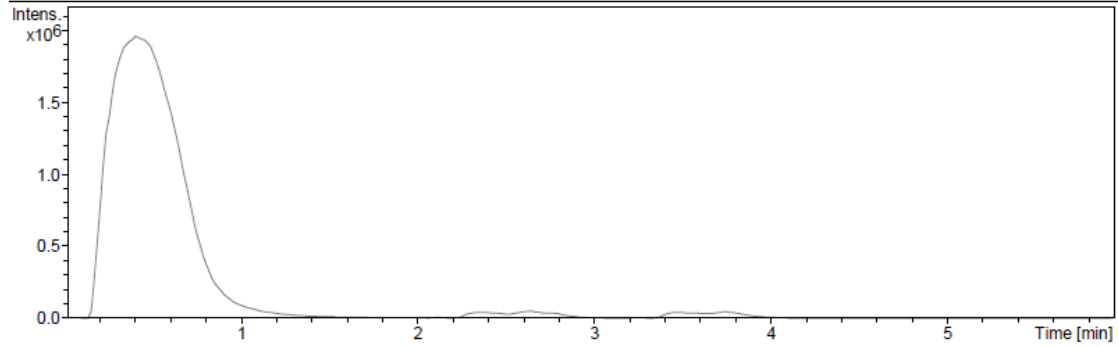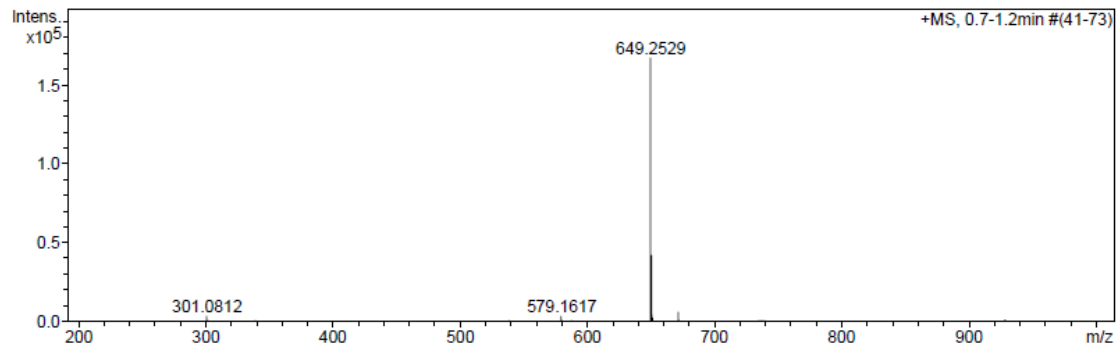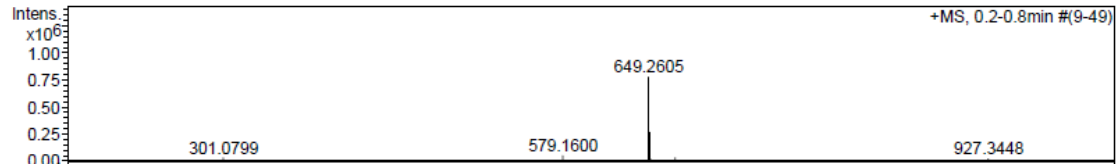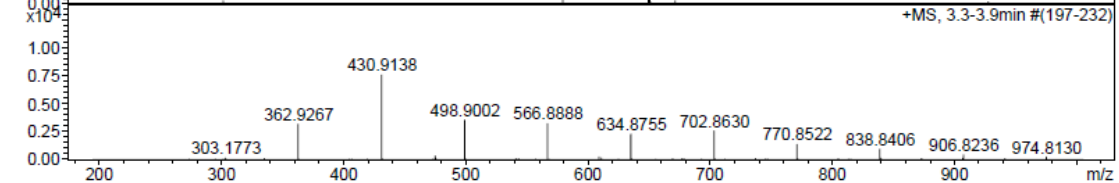

# Compound 3c

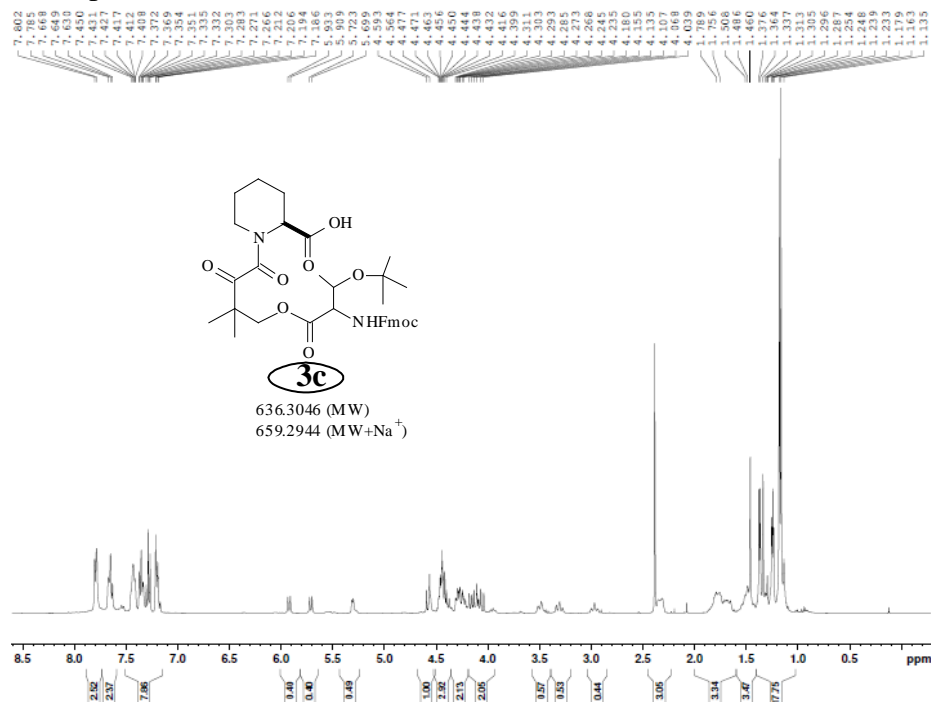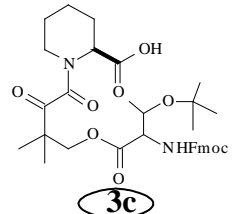

636.3046 (MW)  
659.2944 (MW+Na<sup>+</sup>)

The Ohio State University  
Department of Chemistry  
NMR Facility  
400MHz - 0953

Current Data Parameters  
NAME Thr final buildbio  
EXPNO 1  
PROCNO 1

F2 - Acquisition Parameters  
Data\_ 20100715  
Time 11:19  
INSTRUM spect  
PROBHD 5 mm QNP 1H/13  
PULPROG zg30  
ID 65536  
SOLVENT CDCl3  
NS 16  
DS 2  
SWH 8278.146 Hz  
FIDRES 0.126314 Hz  
AQ 3.9584243 sec  
RG 35.9  
DW 60.400 usec  
DE 6.00 usec  
TE 300.2 K  
D1 1.00000000 sec  
TD 1

CHANNEL f1  
NUC1 1H  
P1 13.00 usec  
PL1 0.00 dB  
SF01 400.1324710 MHz

F2 - Processing parameters  
SI 32768  
SF 400.1300000 MHz  
WDW EM  
SSB 0  
LB 0.30 Hz  
GB 0  
PC 1.00

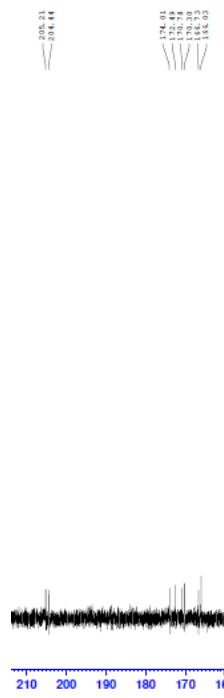

# Display Report

## Analysis Info

Analysis Name D:\Data\peixwu\Thr deallyl final buildblock 100714.d  
Method 300 to 900.m  
Sample Name  
Comment

Acquisition Date 7/14/2010 5:04:56 PM

Operator xwu  
Instrument / Ser# micrOTOF 194

## Acquisition Parameter

|             |          |                      |          |                  |           |
|-------------|----------|----------------------|----------|------------------|-----------|
| Source Type | ESI      | Ion Polarity         | Positive | Set Nebulizer    | 0.4 Bar   |
| Focus       | Active   |                      |          | Set Dry Heater   | 200 °C    |
| Scan Begin  | 200 m/z  | Set Capillary        | 4500 V   | Set Dry Gas      | 4.0 l/min |
| Scan End    | 1000 m/z | Set End Plate Offset | -500 V   | Set Divert Valve | Waste     |

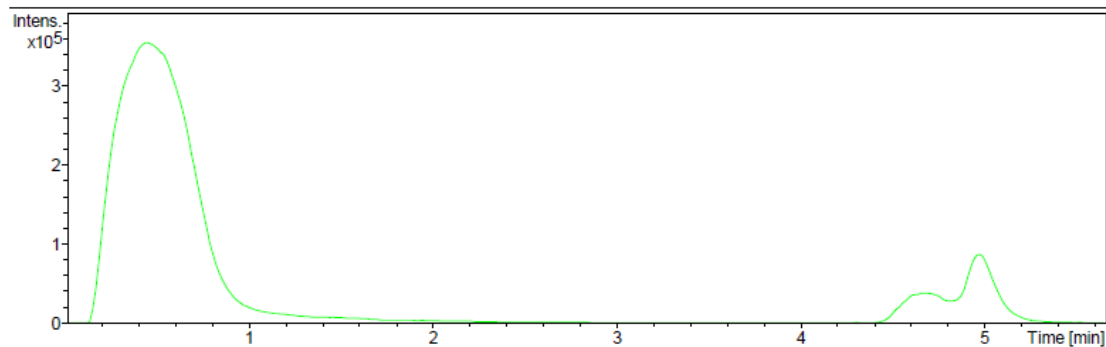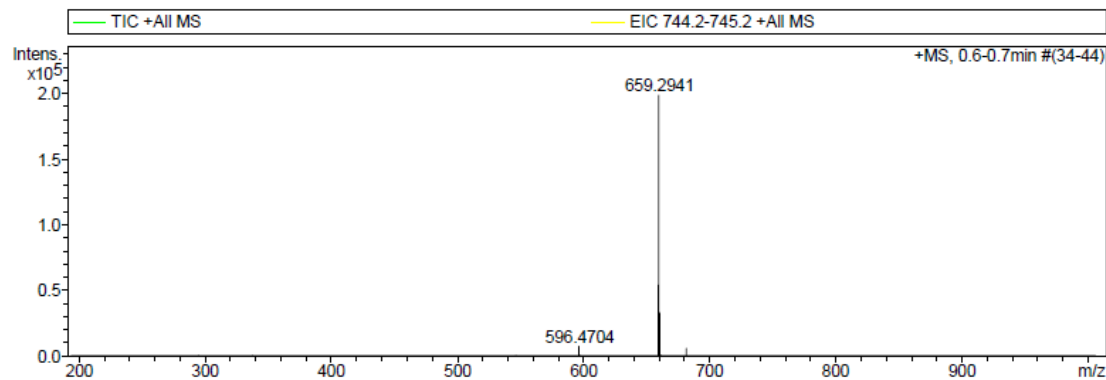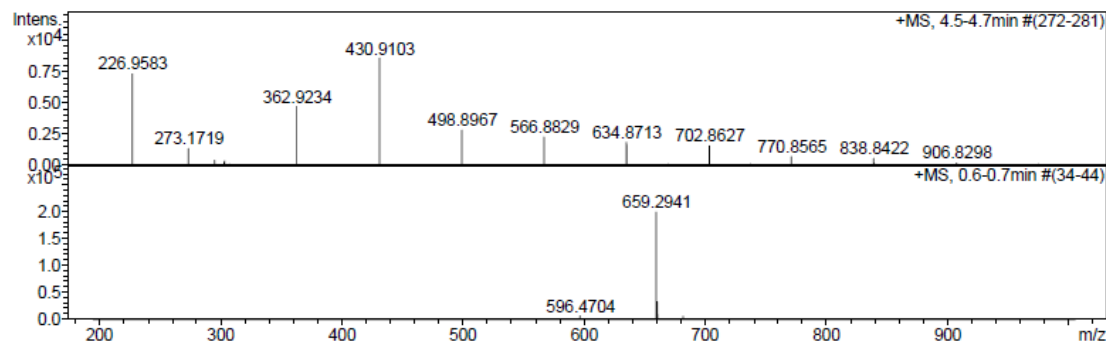

**Figure S2.** ESI MS of Rapalogs **2a-y** in Table 1

**2a**

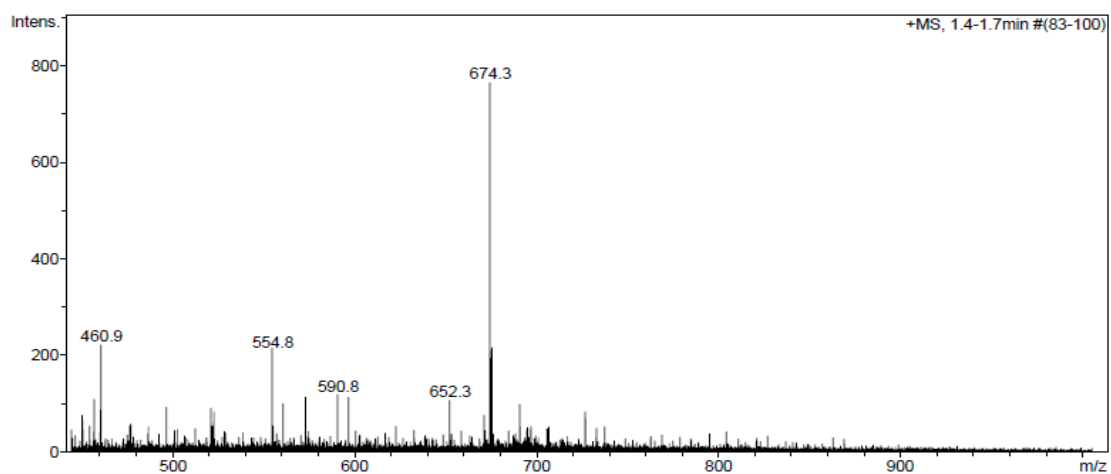

**2b**

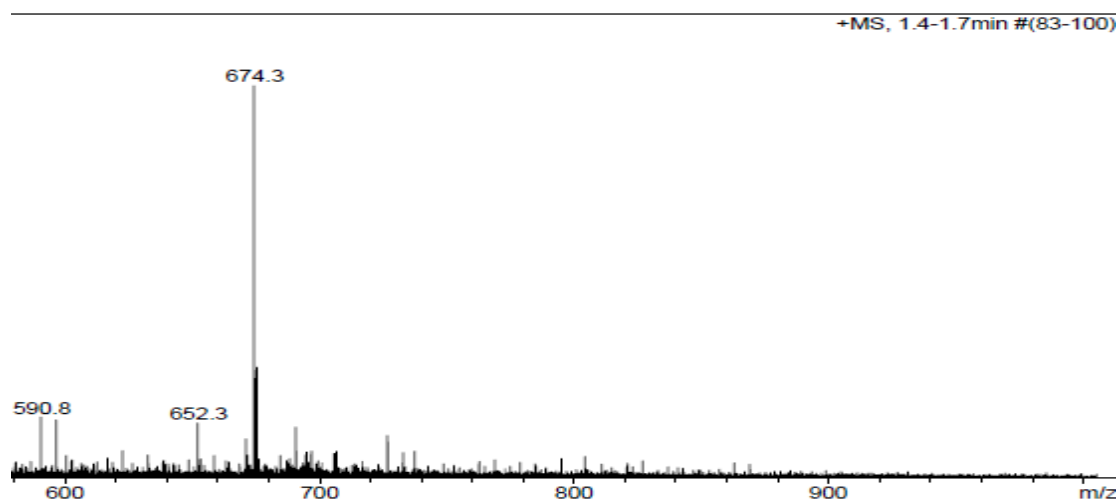

**2c**

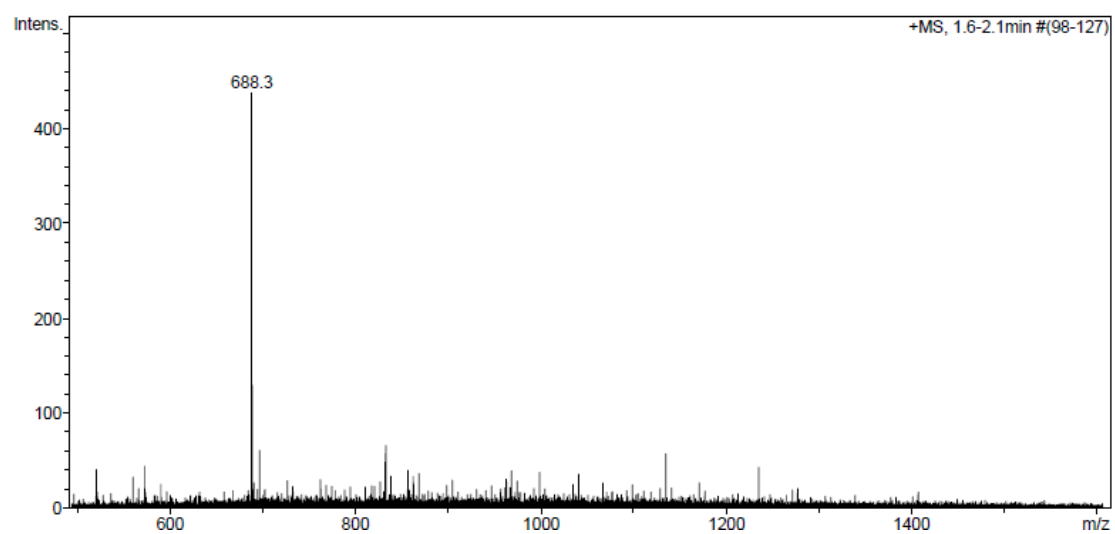

2d

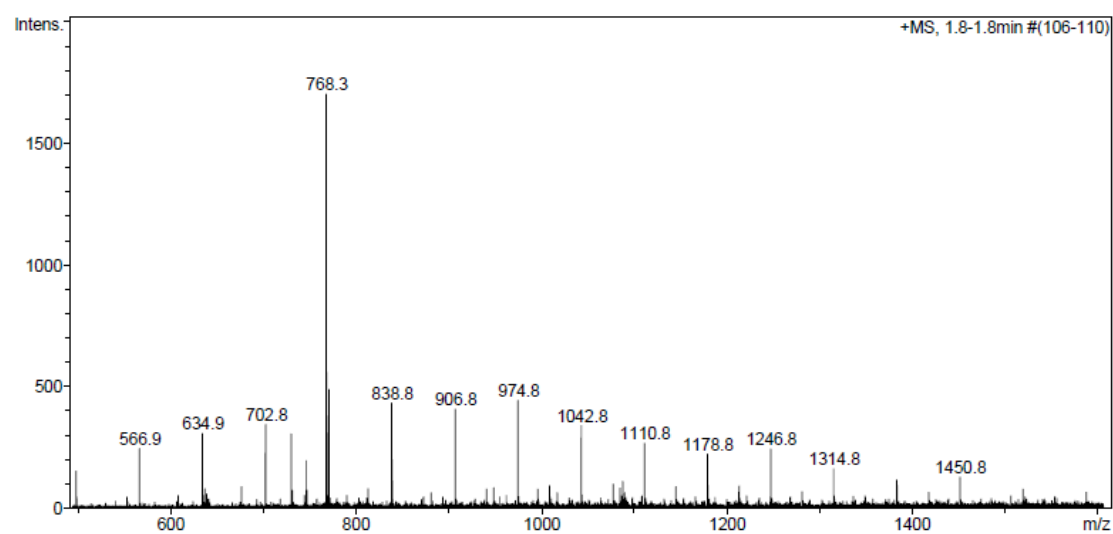

2e

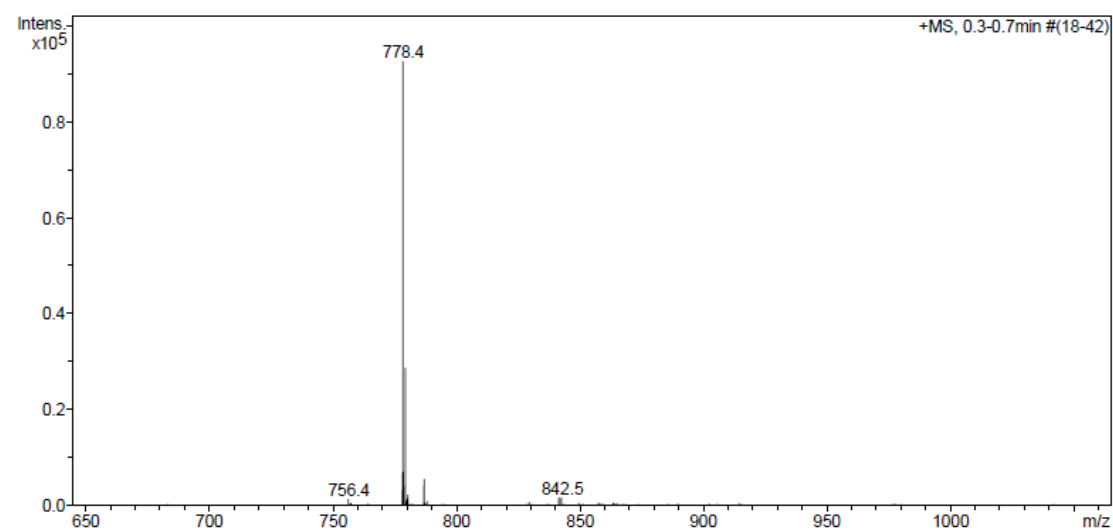

2f

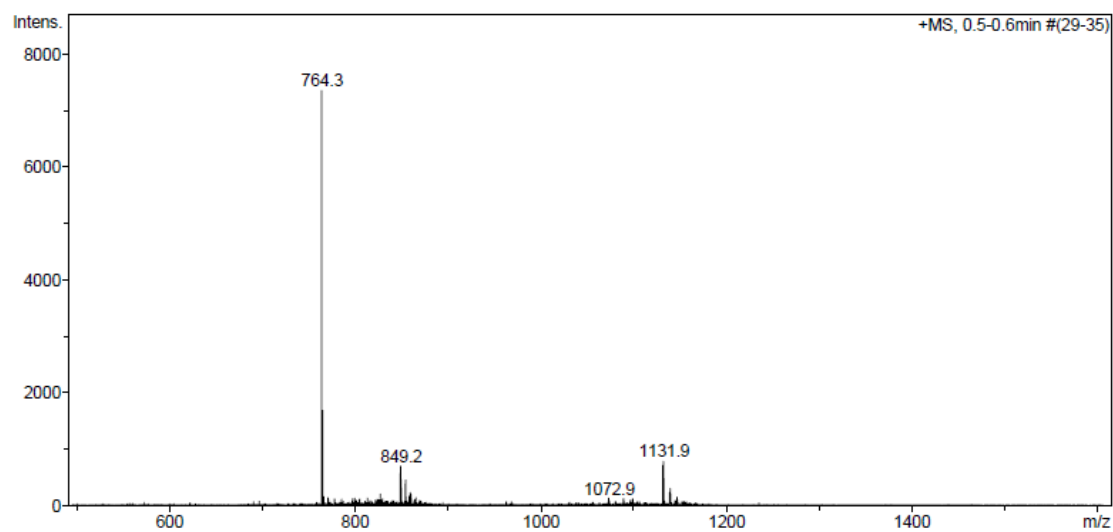

**2g**

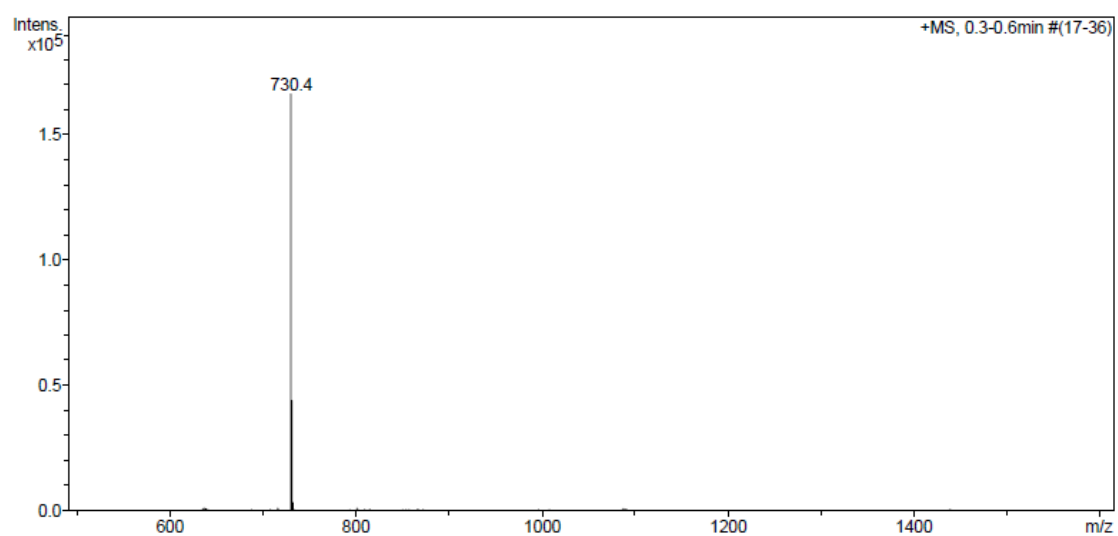

**2h**

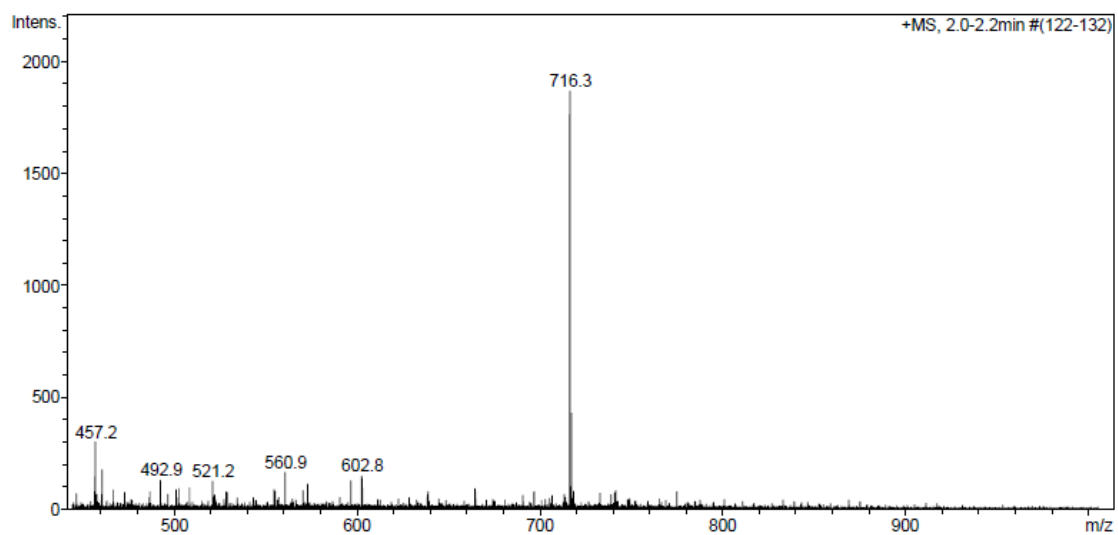

**2i**

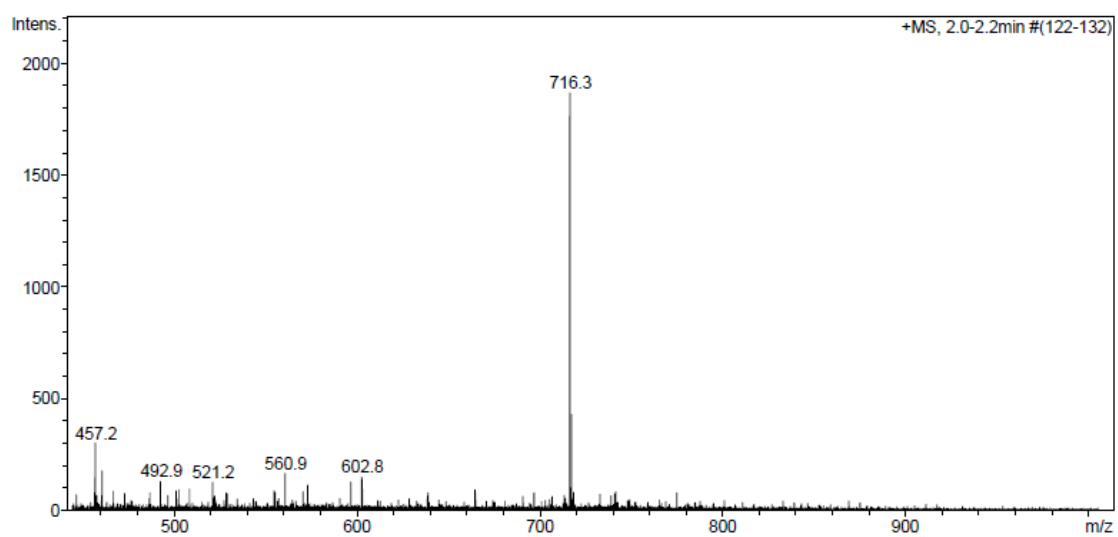

2j

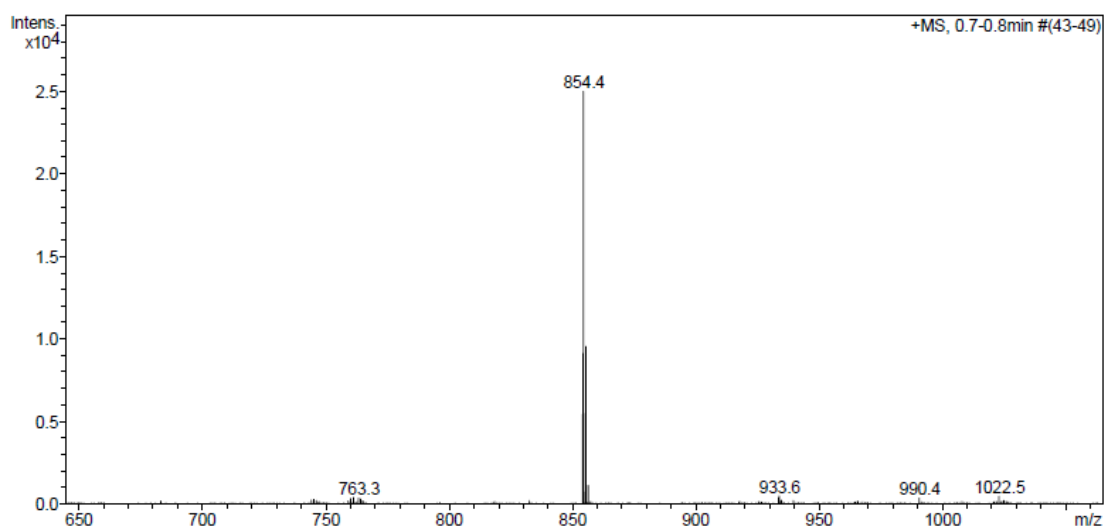

2k

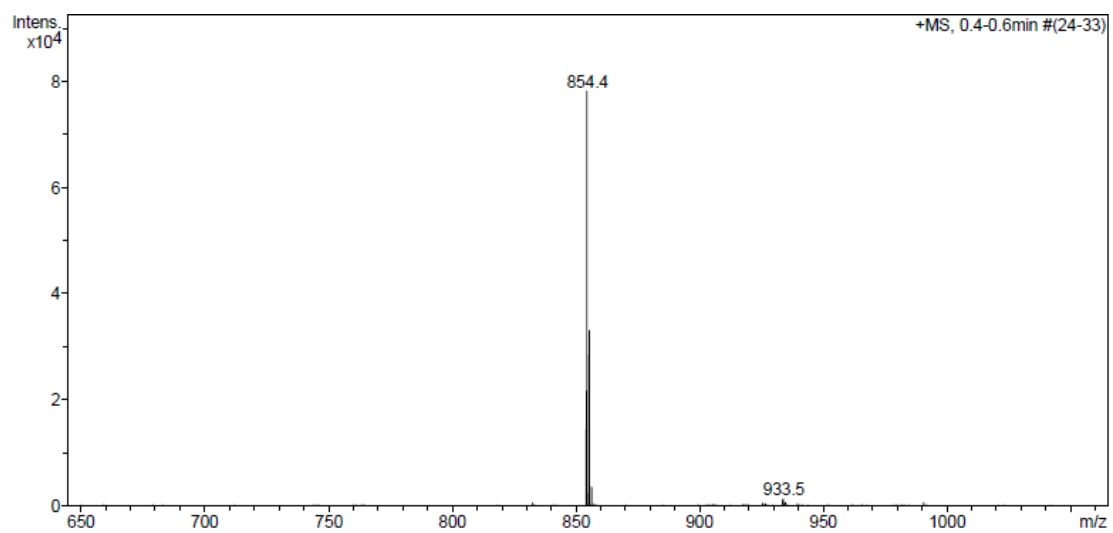

2l

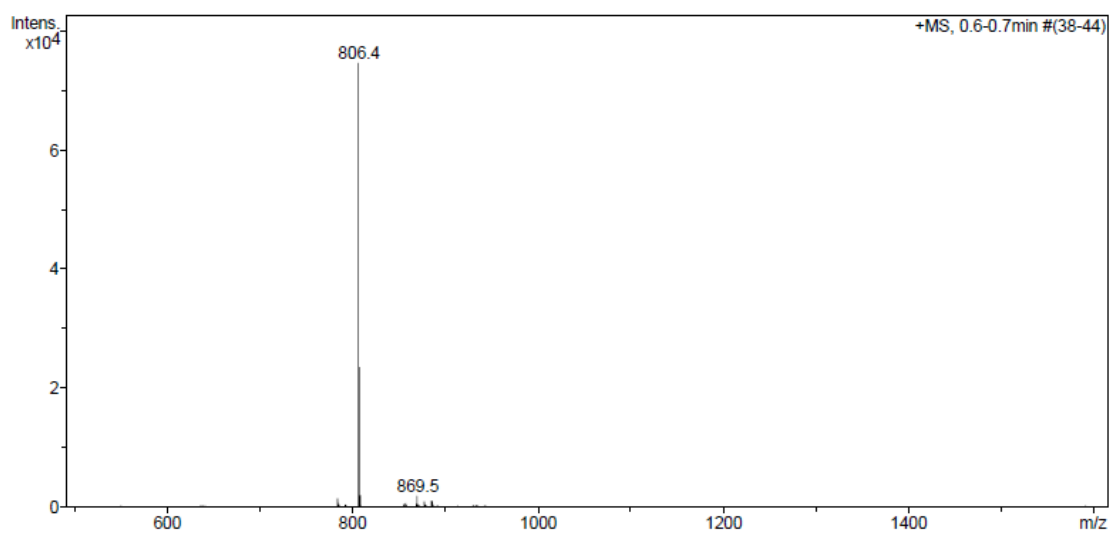

### 2m

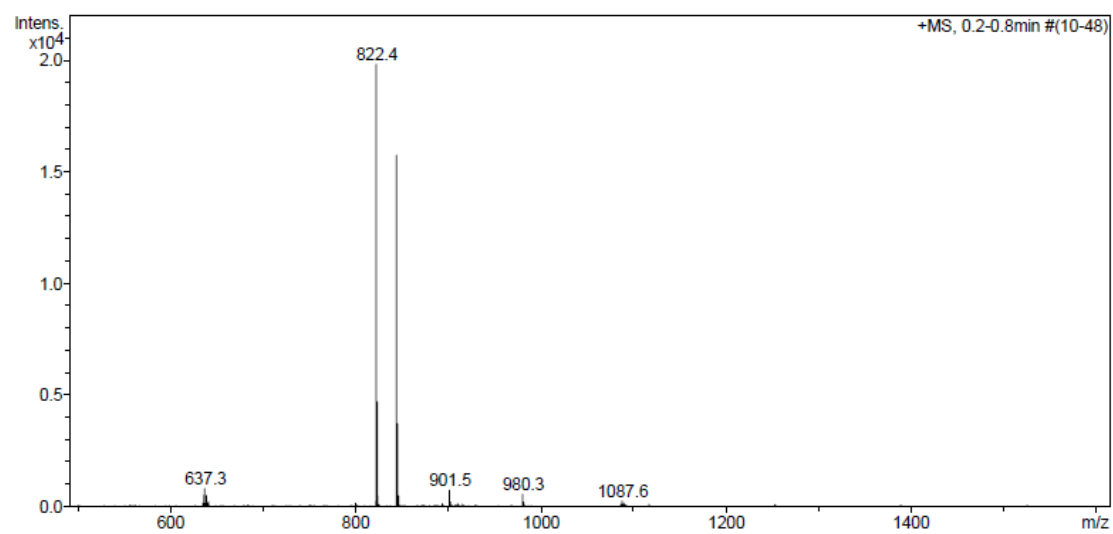

### 2n

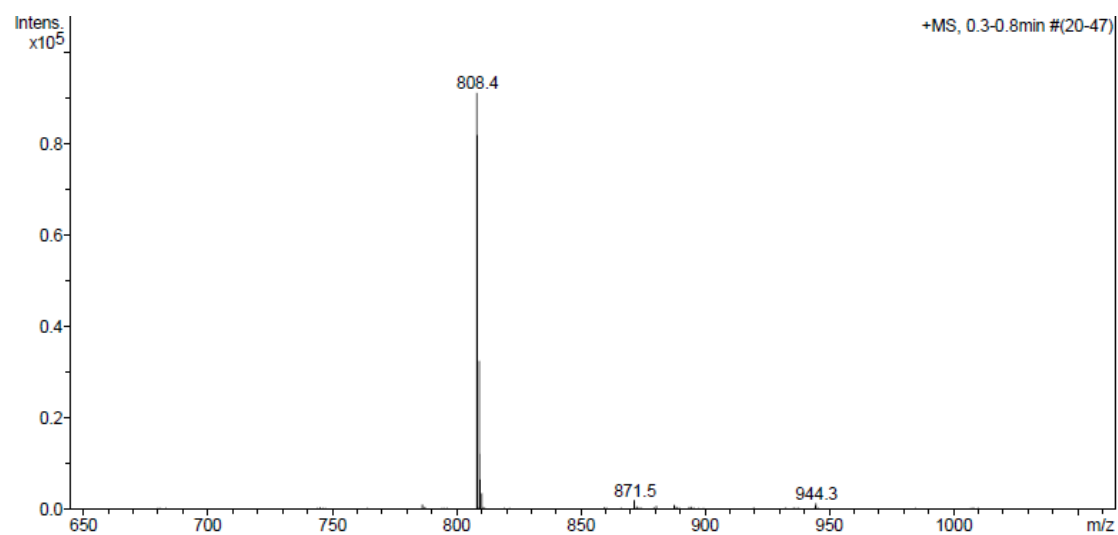

### 2o

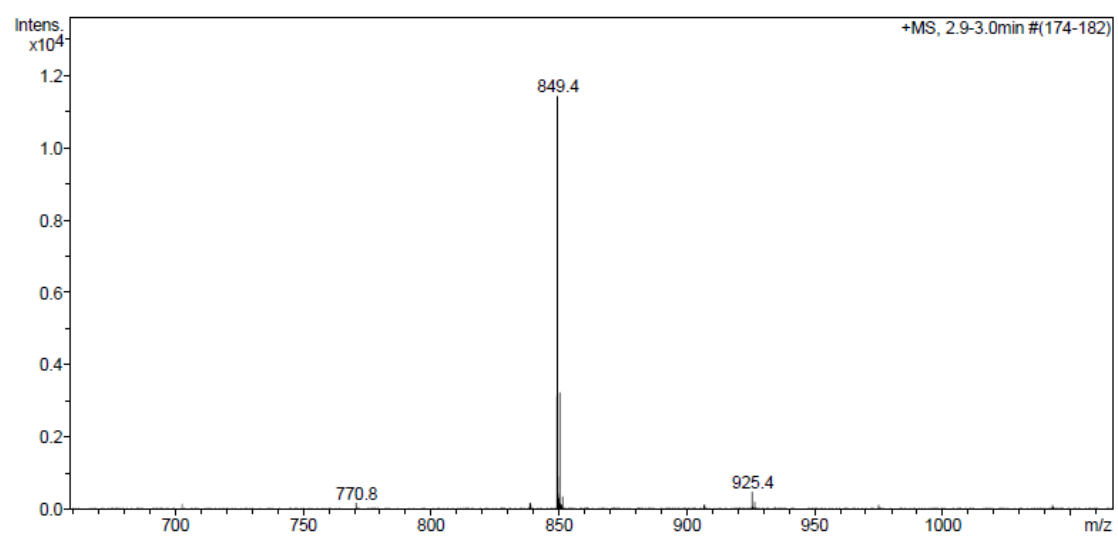



2p

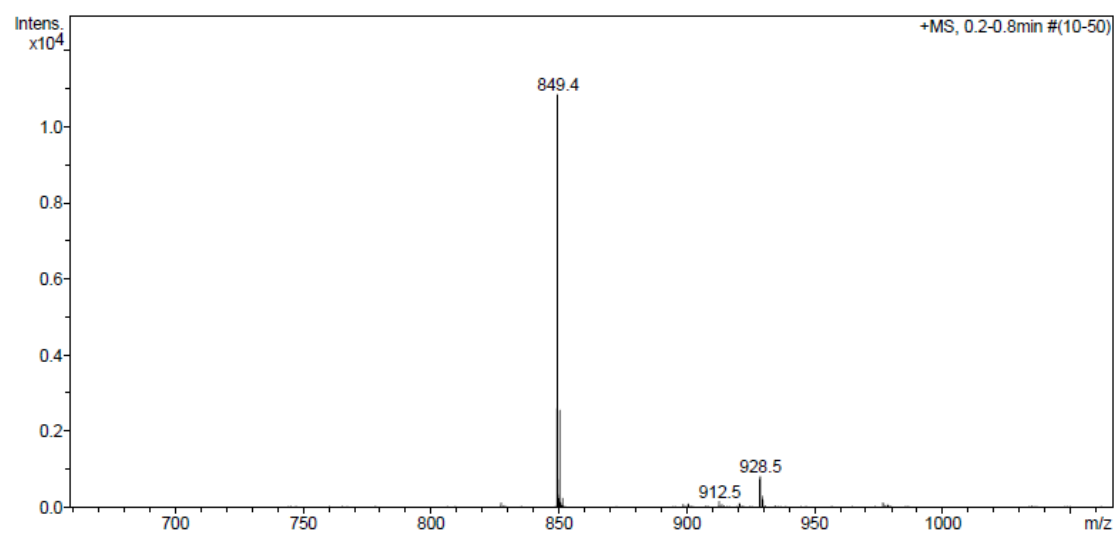

2q

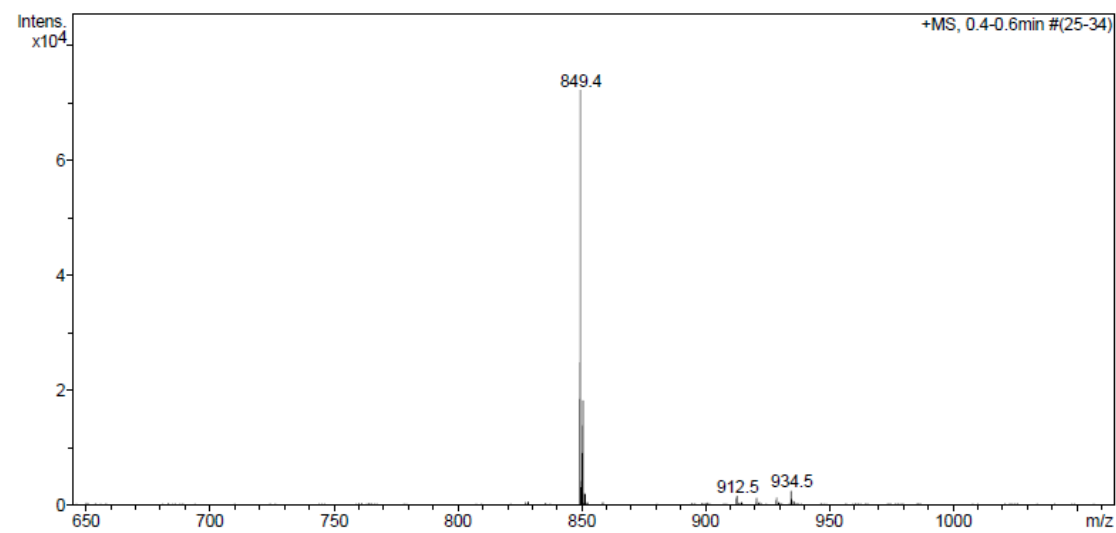

2r

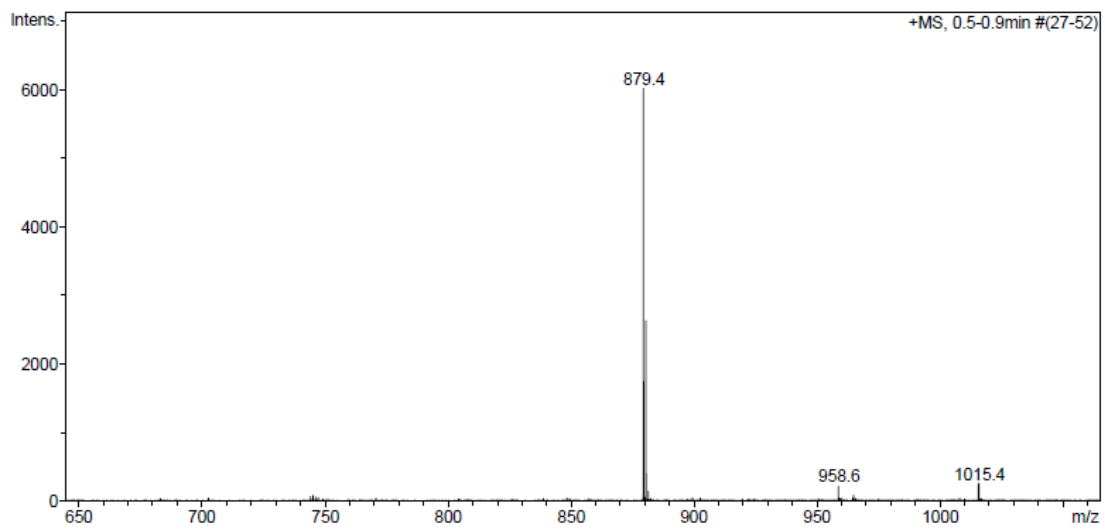

2s

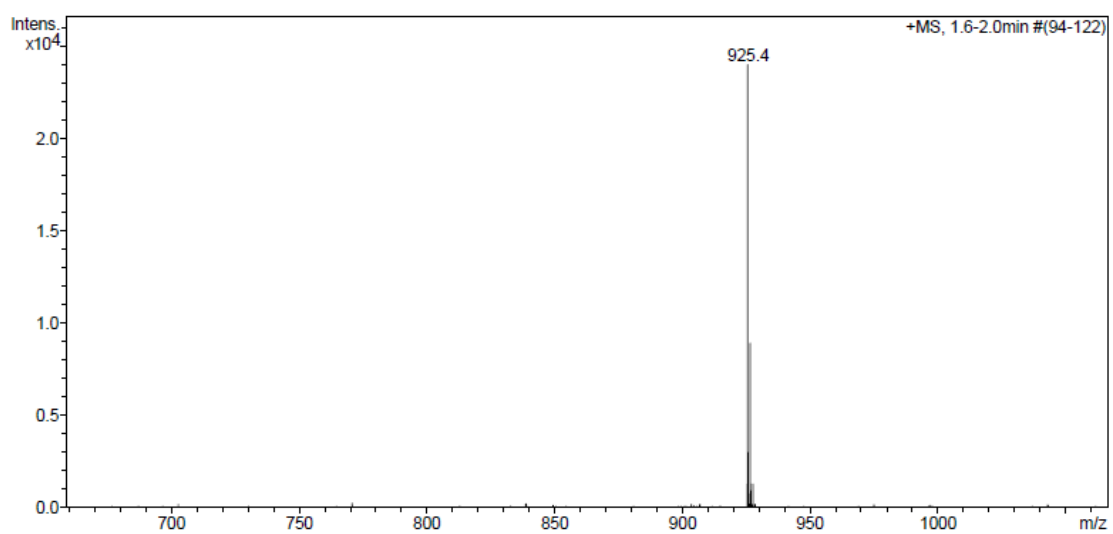

2t

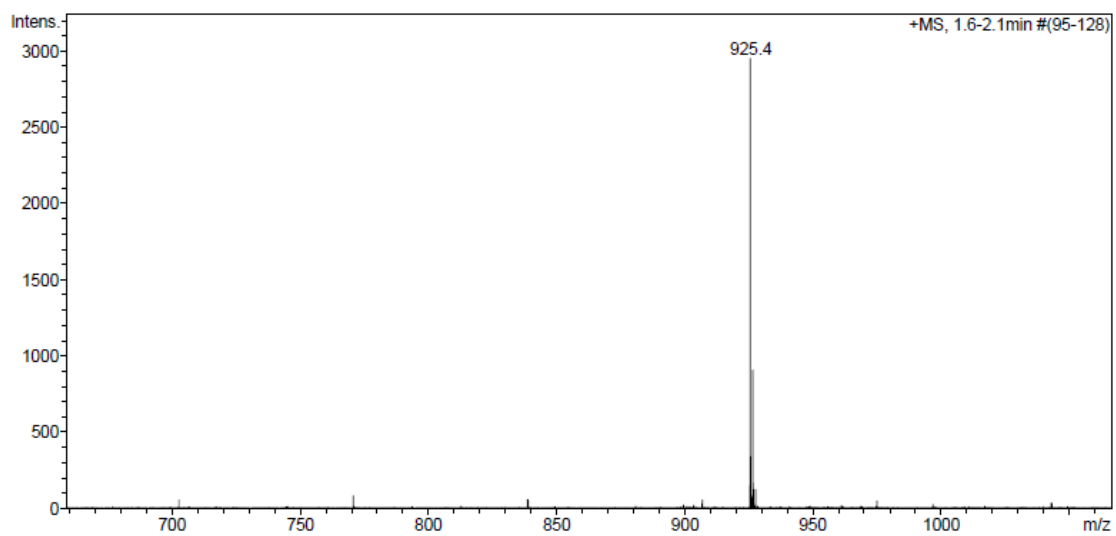

2u

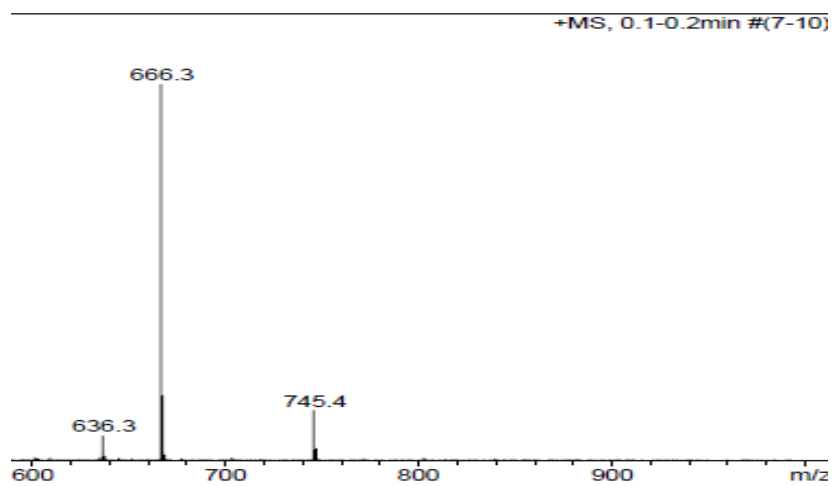

2v

+MS, 0.2min #(9)

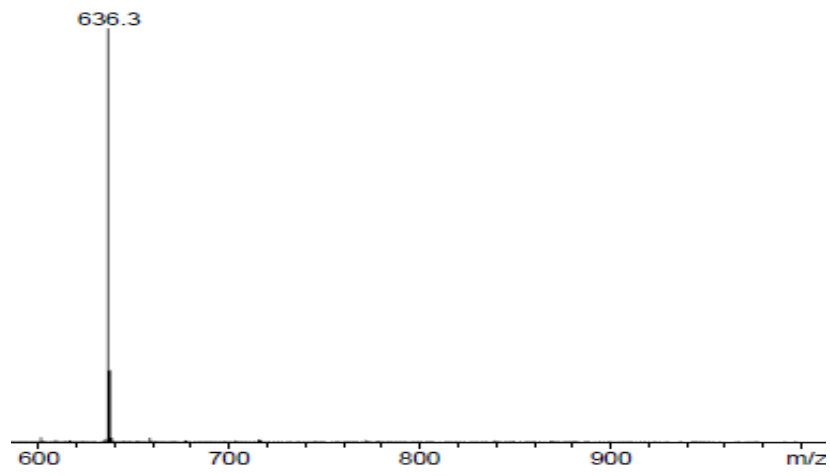

2w

+MS, 0.7-0.7min #(39-42)

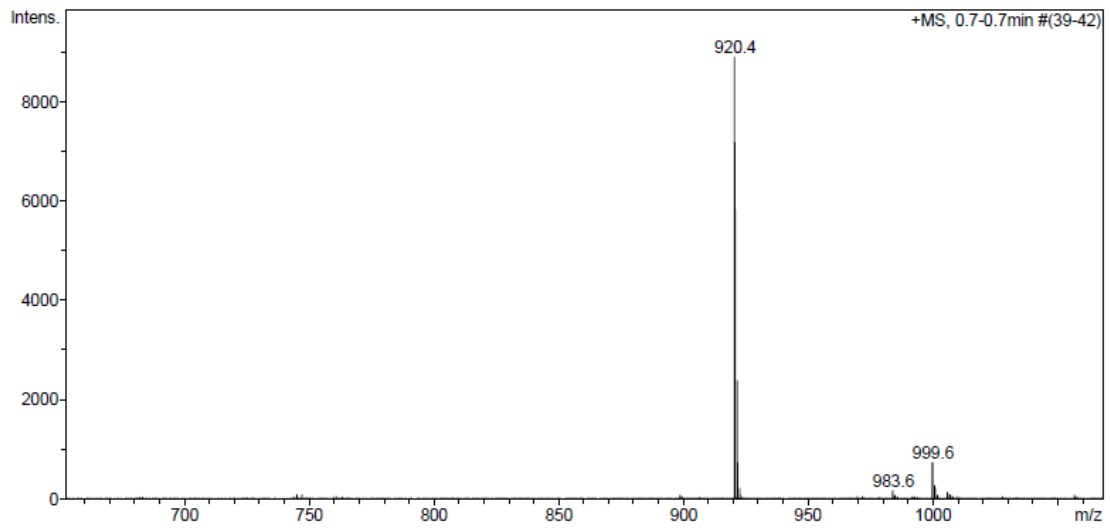

2x

+MS, 1.8-1.9min #(109-113)

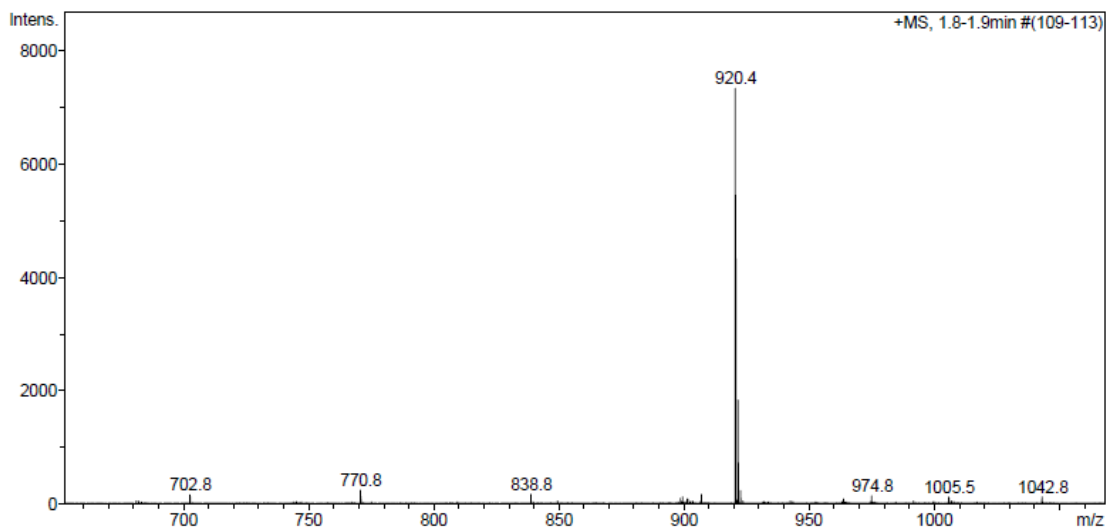

2y

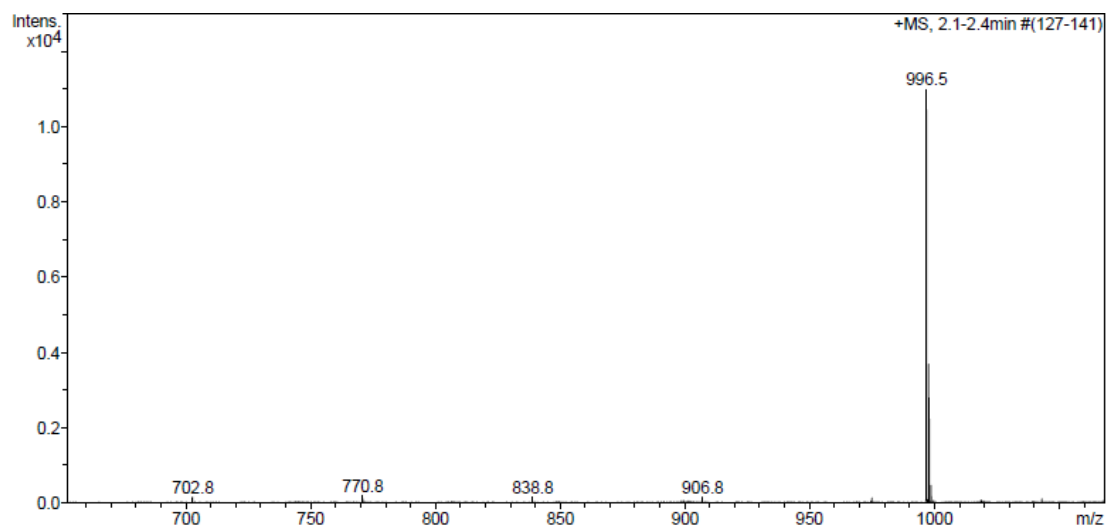

**Figure S3.** MALDI-TOF MS of Rapalogs **11** in Table 2

**11 D-Thr-D-Thr**

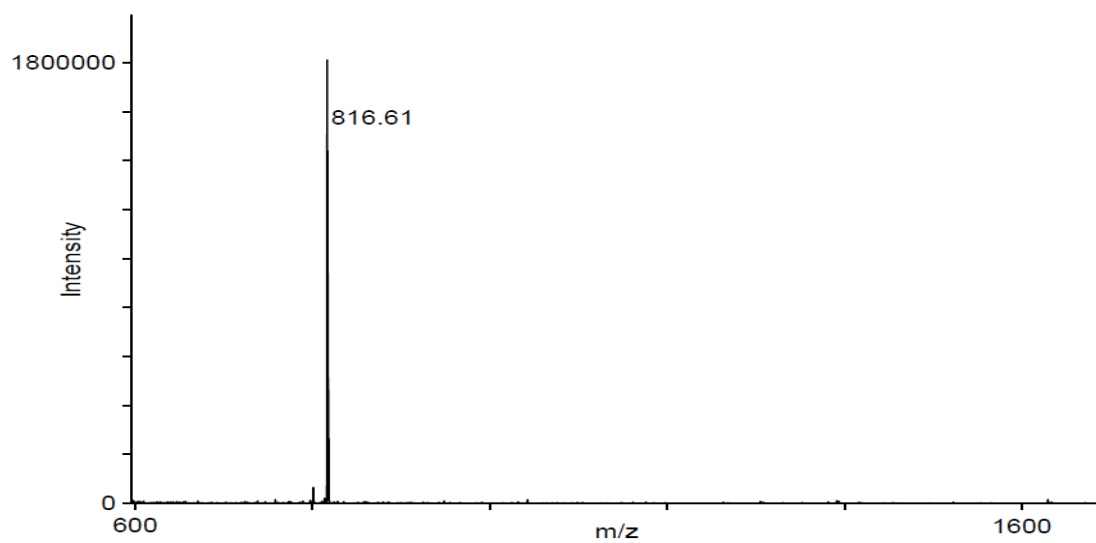

**11 D-Thr-Gly**

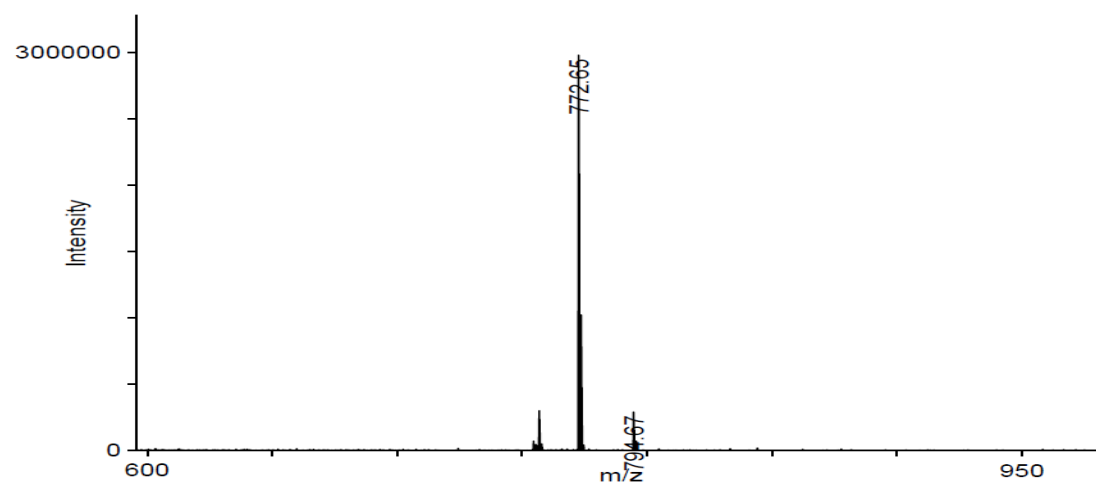

**11 D-Thr-Ala**

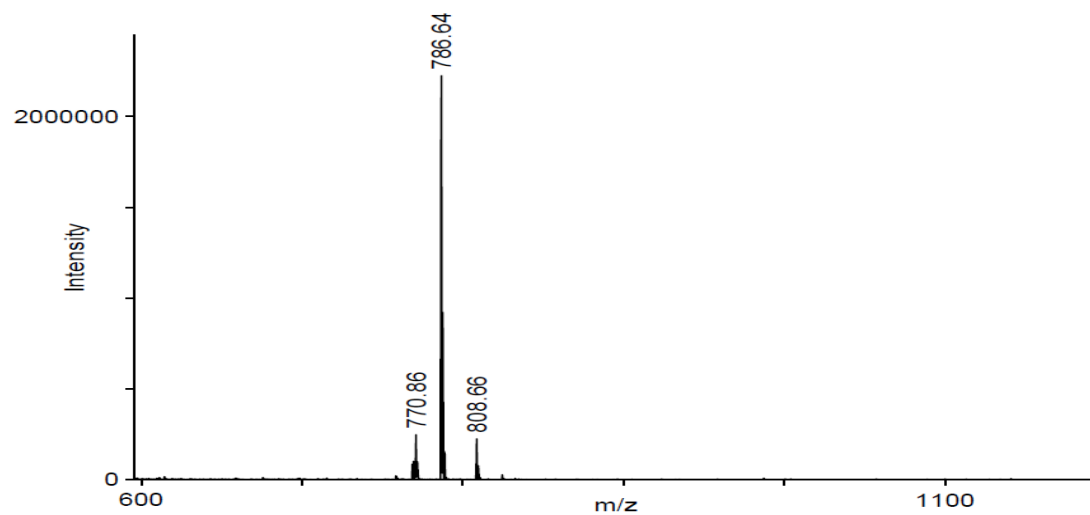

### 11 D-Thr-D-Val

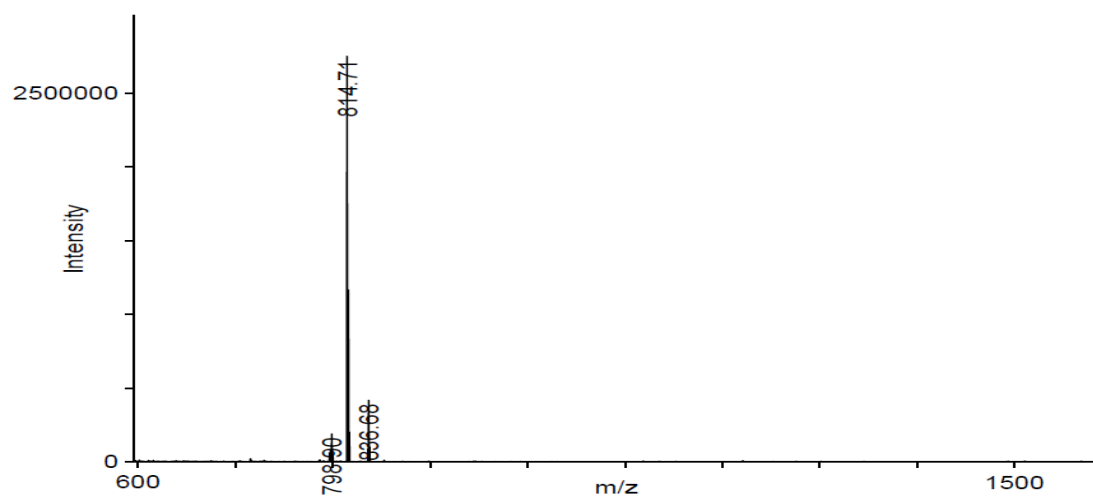

### 11 D-Thr-Pro

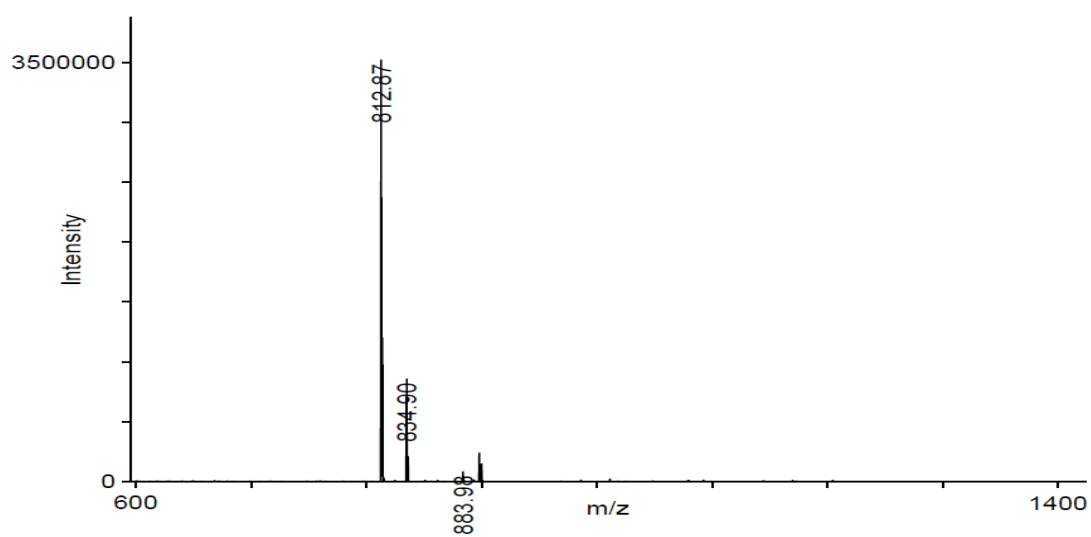

### 11 D-Thr-Lys

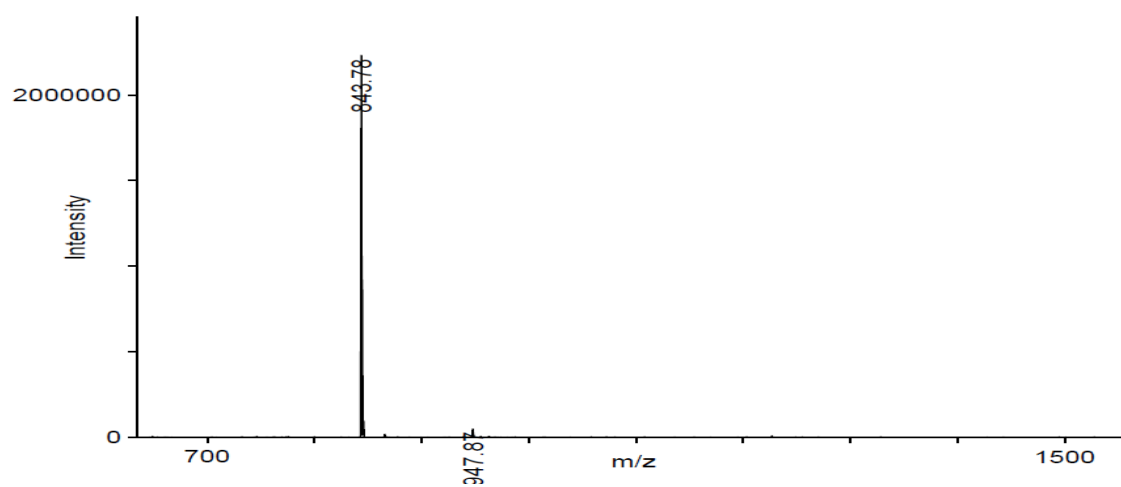

### 11 D-Thr-Asp

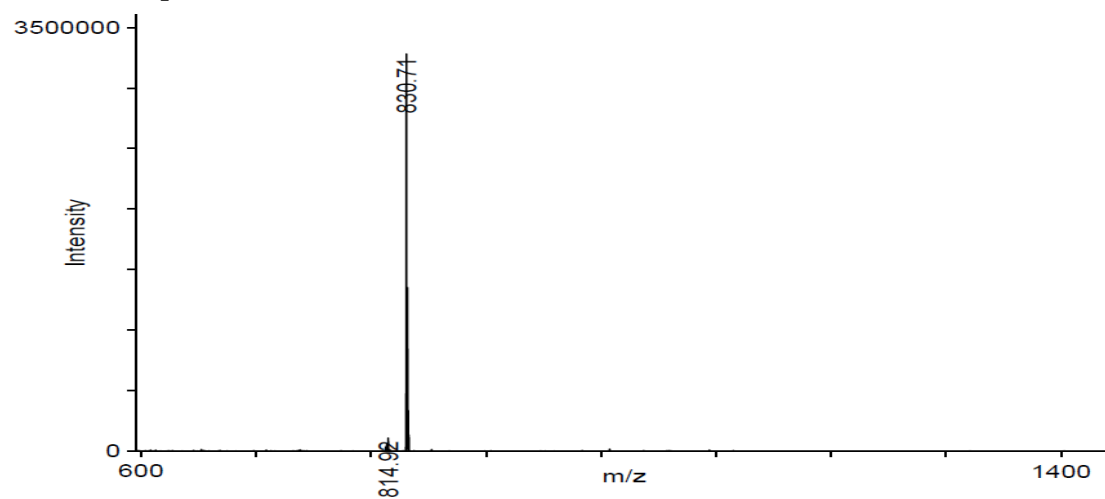

### 11 D-Thr-D-Phe

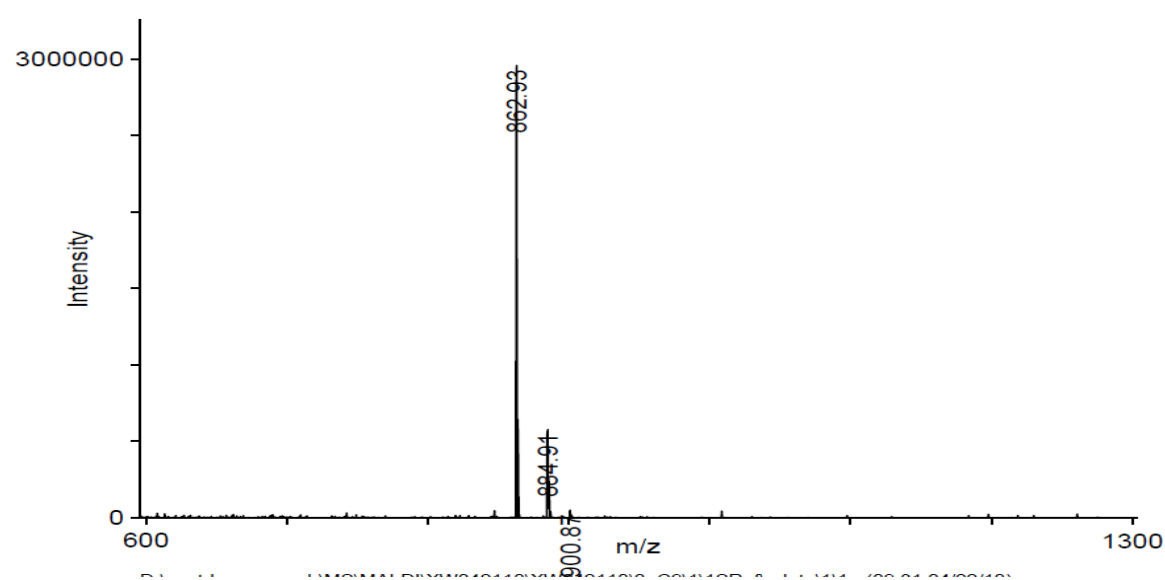

### 11 D-Thr-Nle

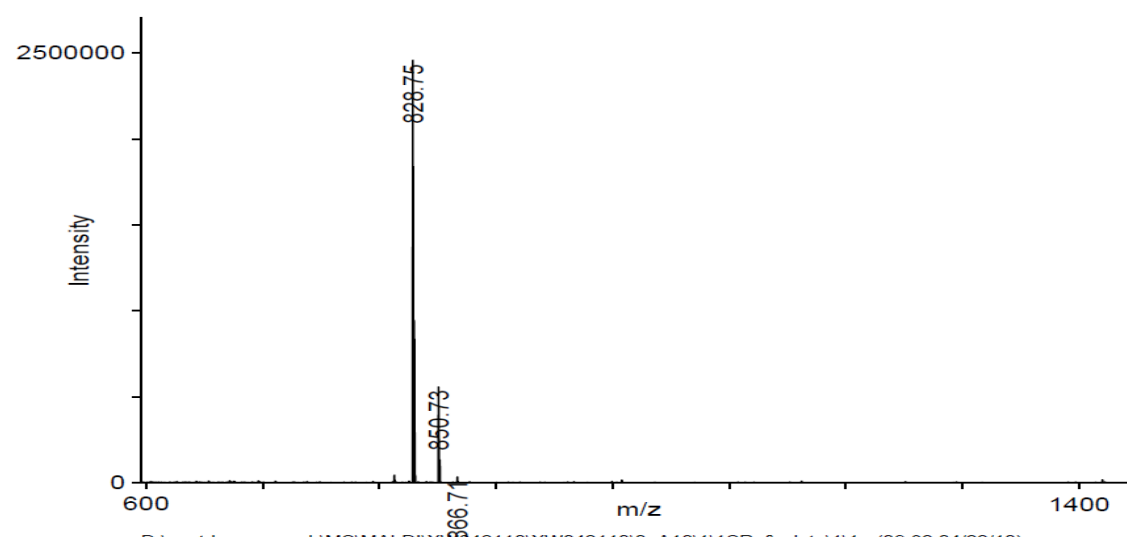

11 Gly-D-Thr

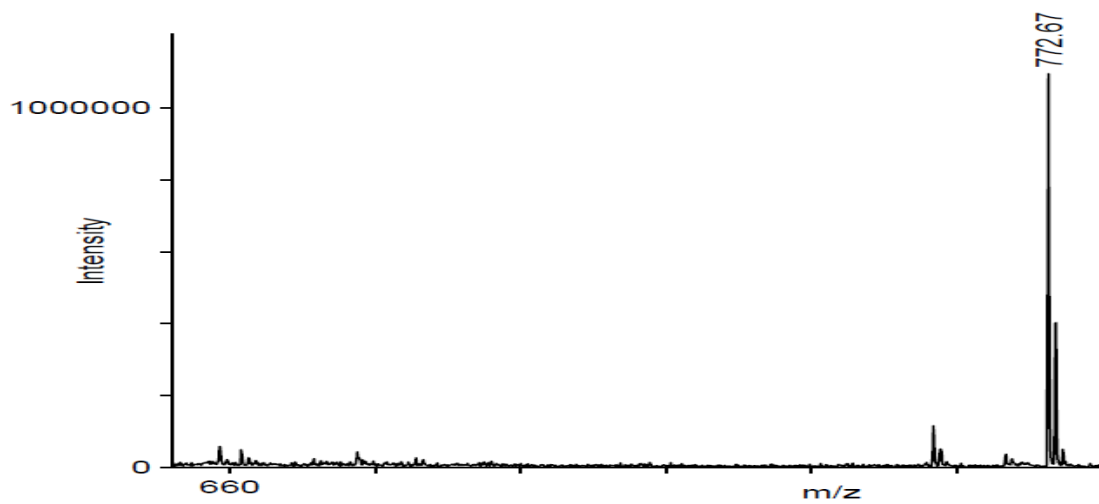

11 Gly-Gly

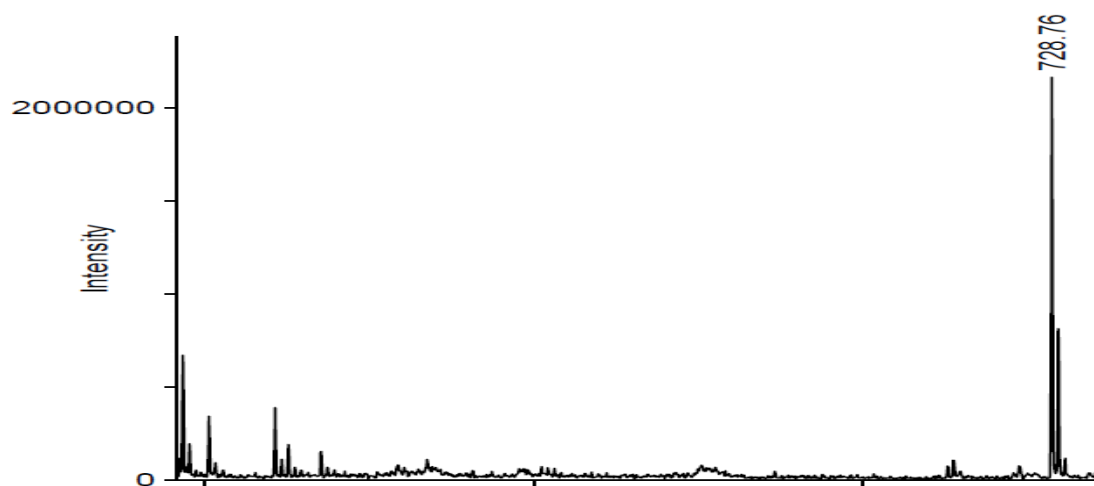

11 Gly-Ala

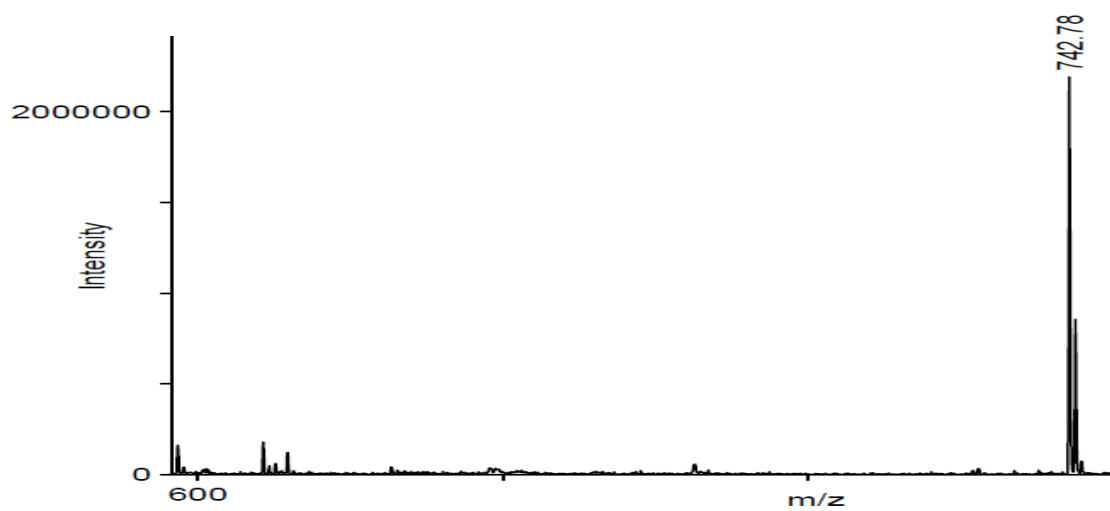



### 11 Gly-D-Val

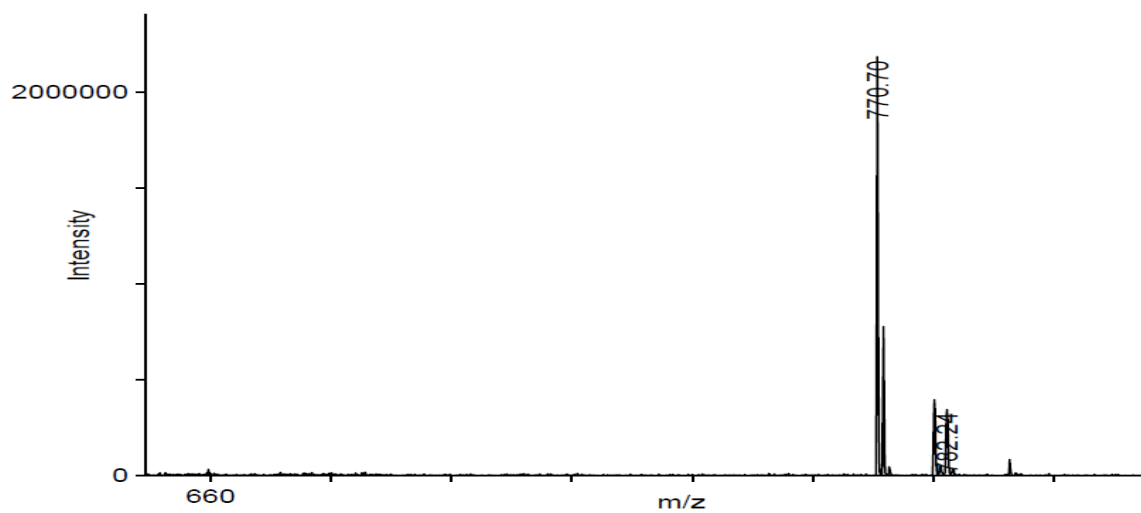

### 11 Gly-Pro

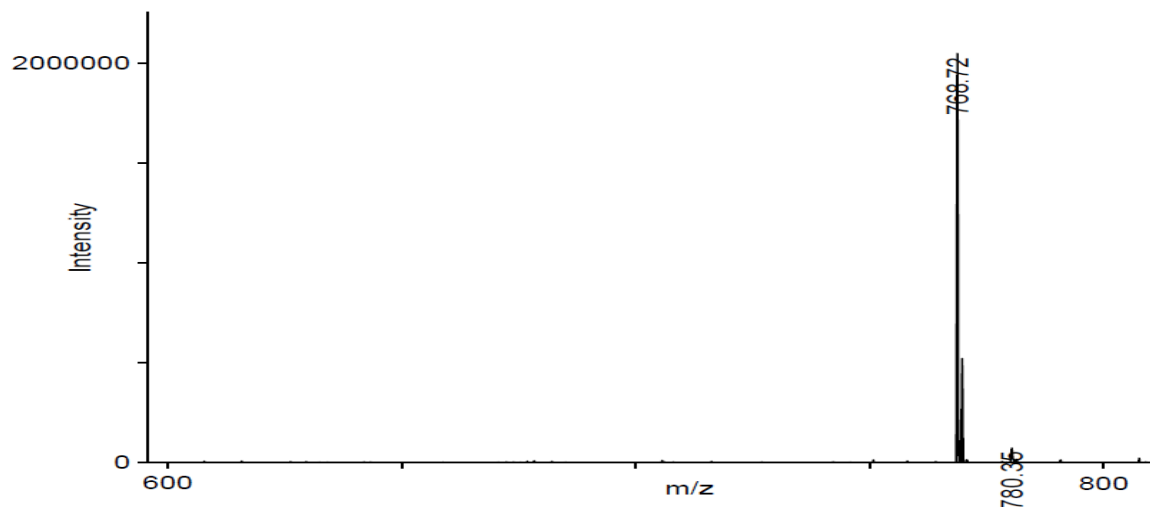

### 11 Gly-Lys

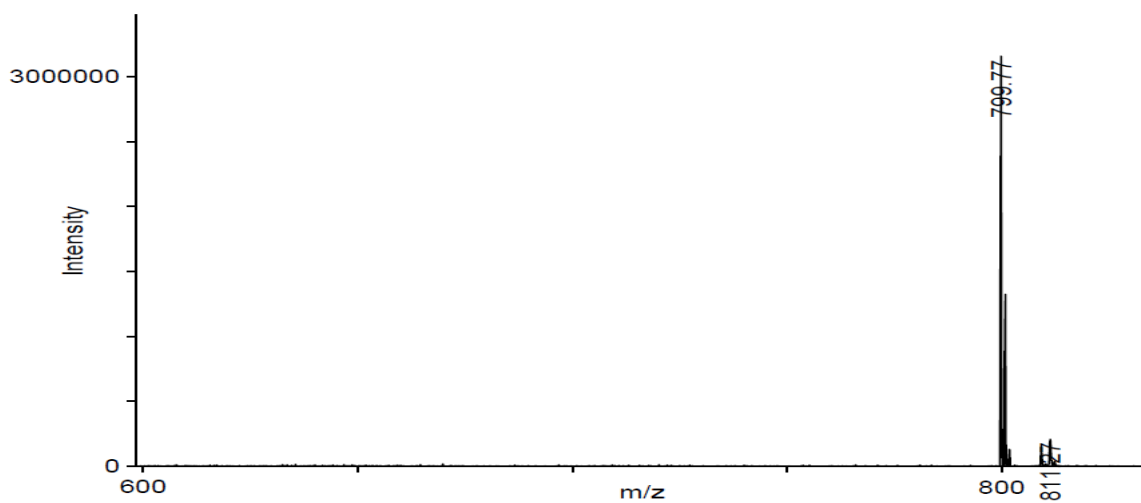

### 11 Gly-Trp

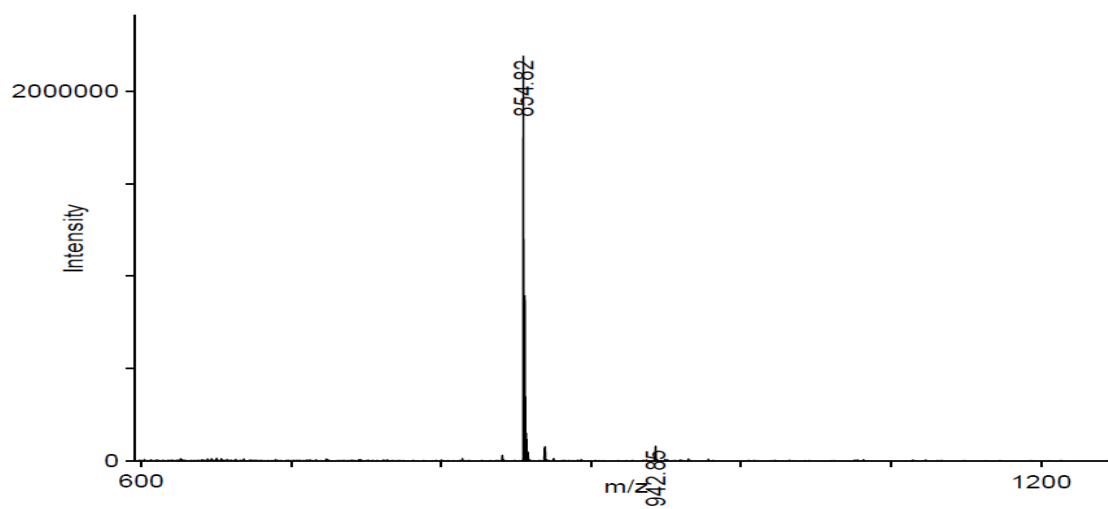

### 11 Gly-Asp

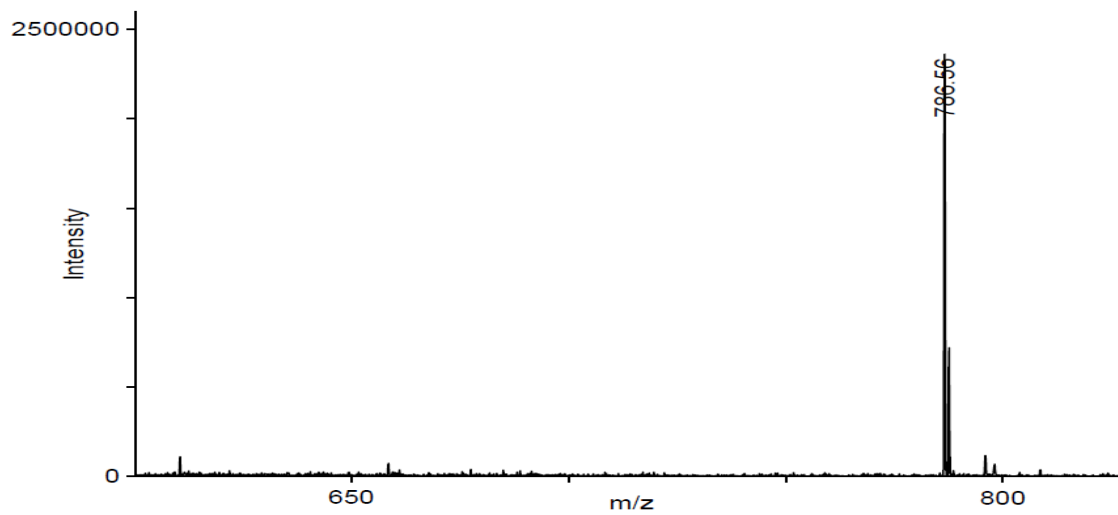

### 11 Gly-D-Phe

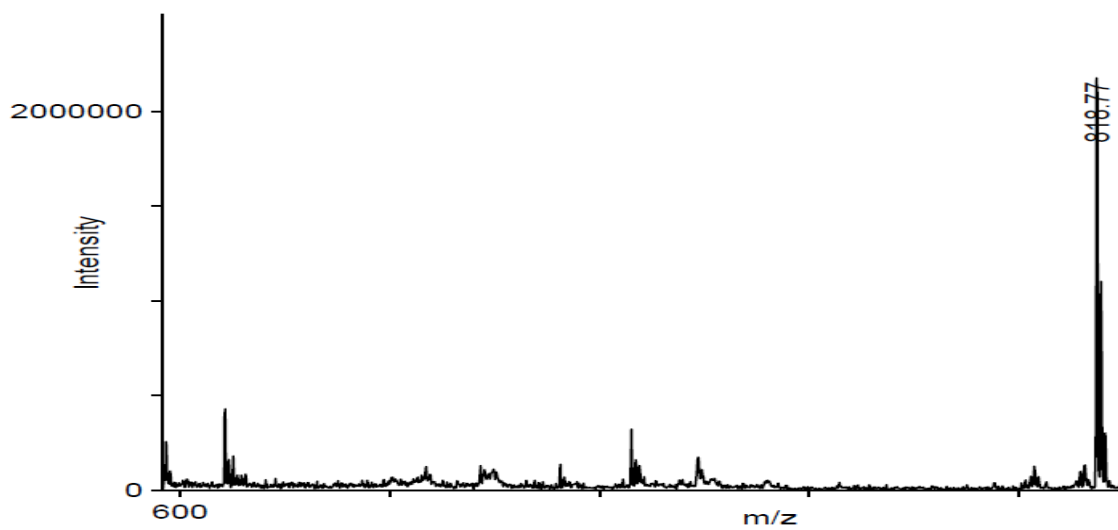

### 11 Gly-Nle

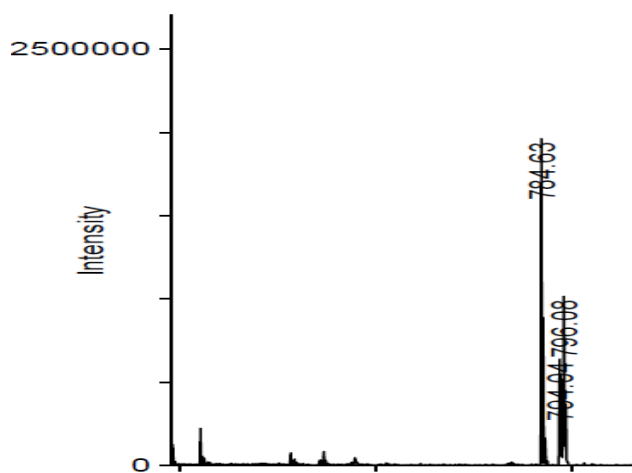

### 11 Ala-D-Thr

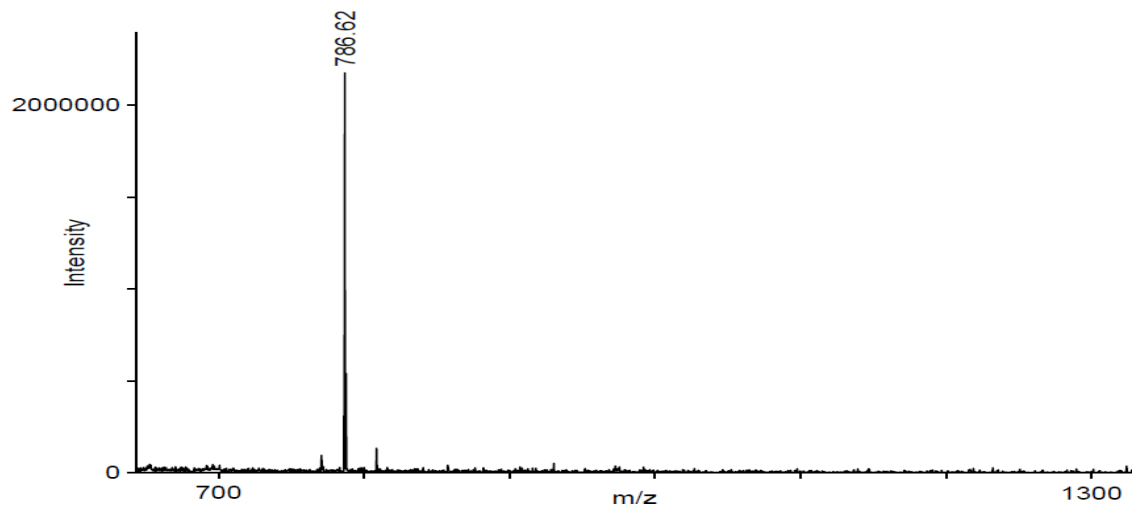

### 11 Ala-Gly

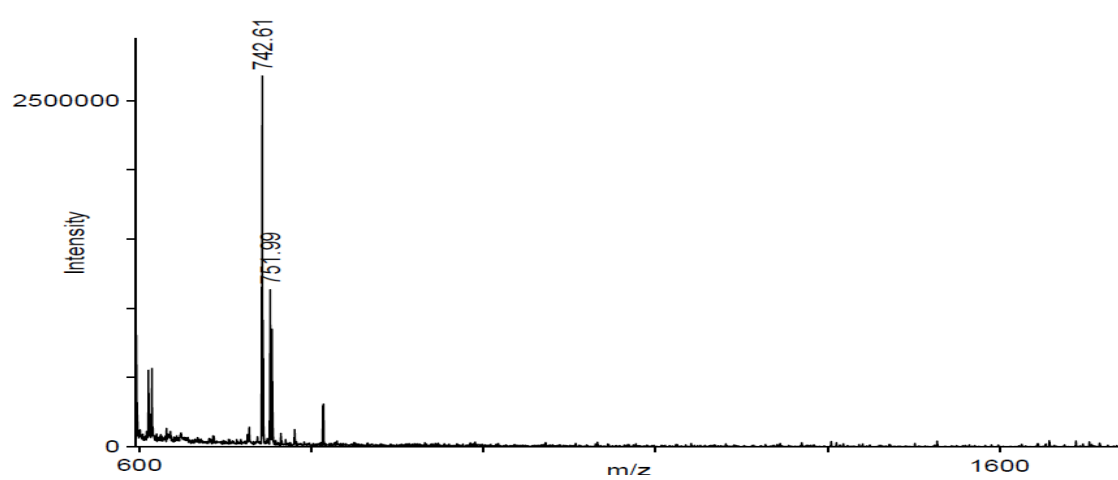

### 11 Ala-Ala

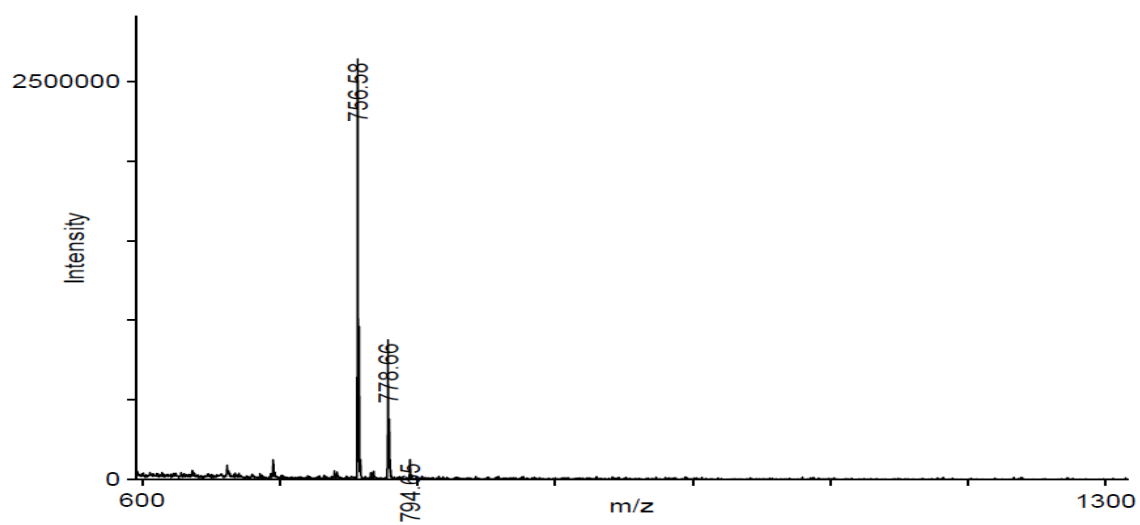

### 11 Ala-D-Val

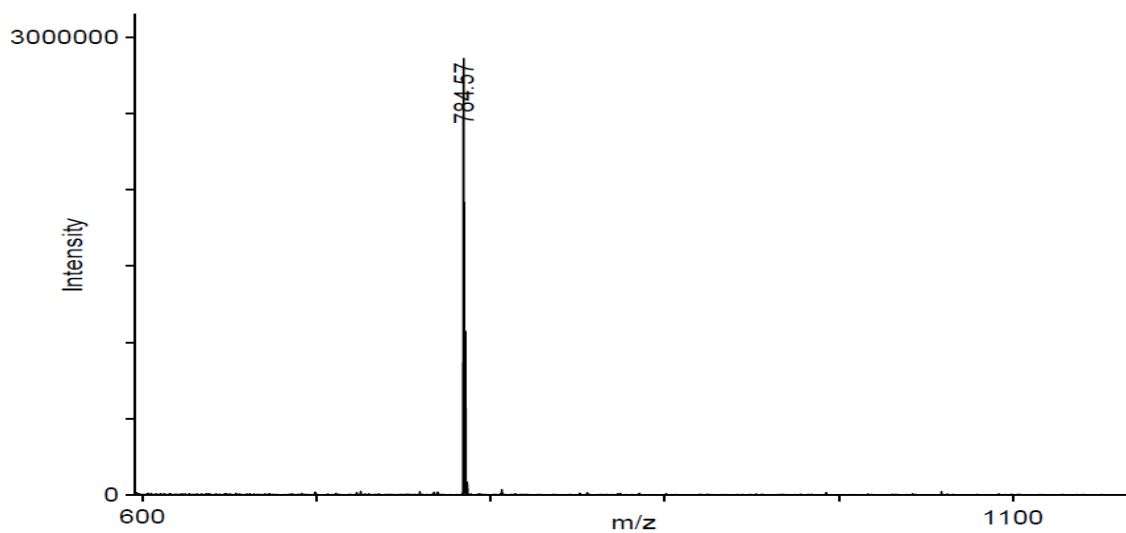

### 11 Ala-Pro

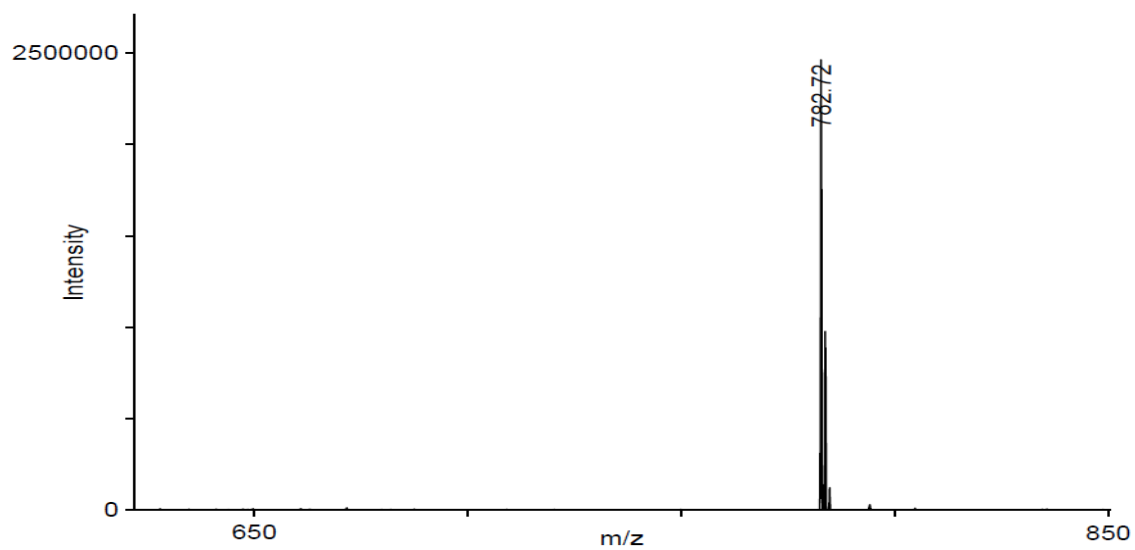

### 11 Ala-Lys

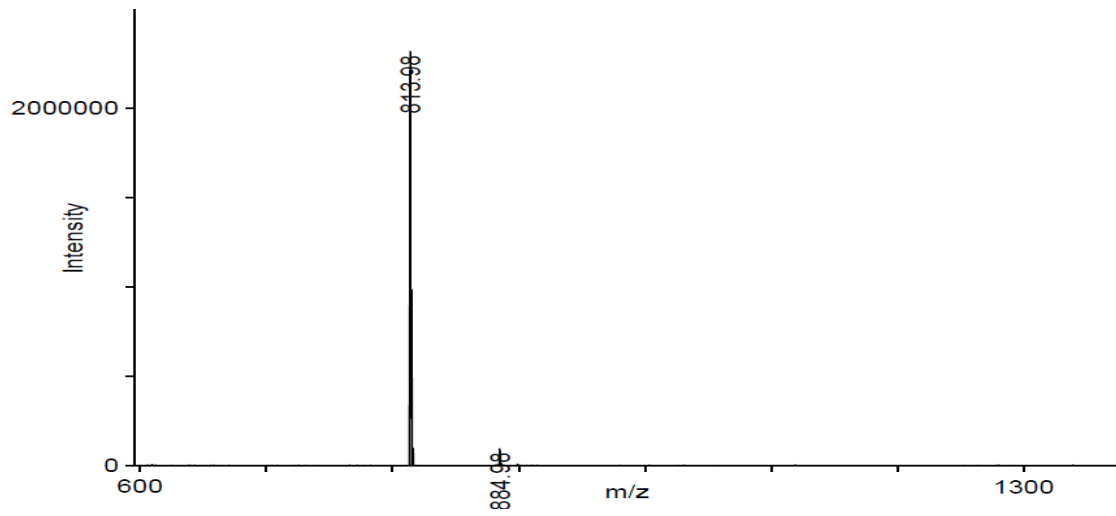

### 11 Ala-Trp

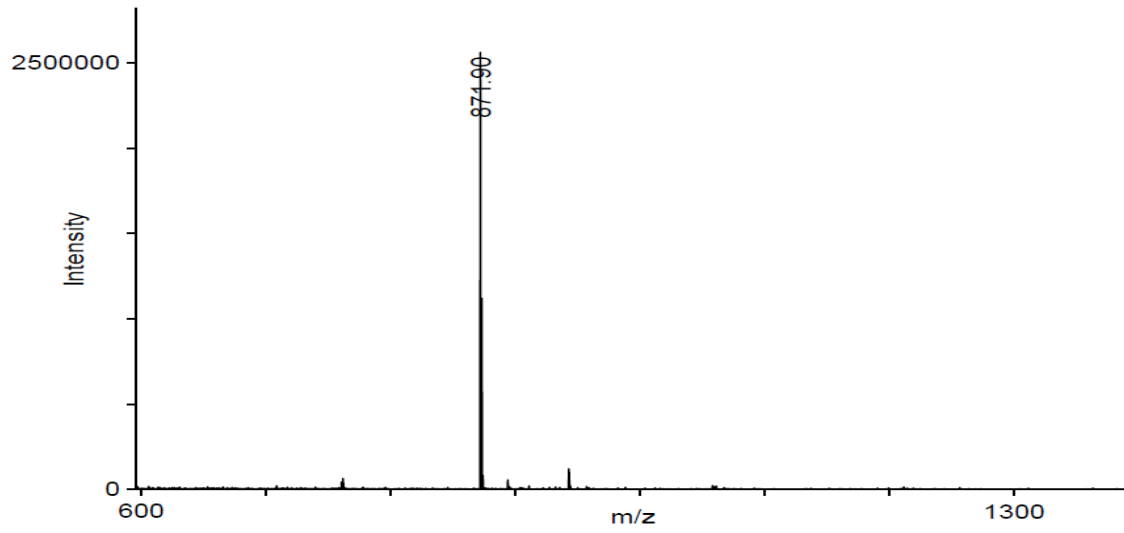

### 11Ala-Asp

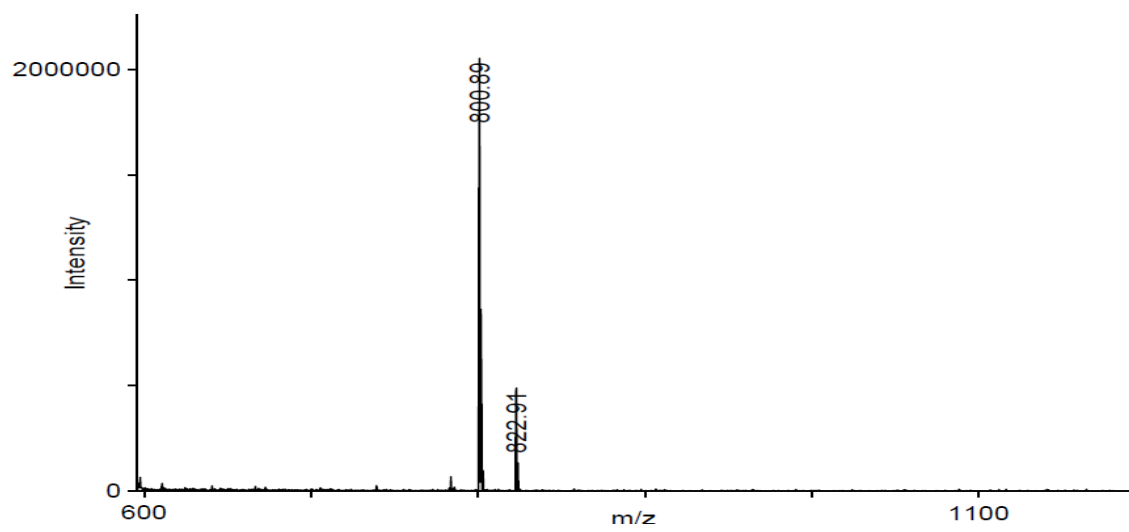

**11 Ala-D-Phe**

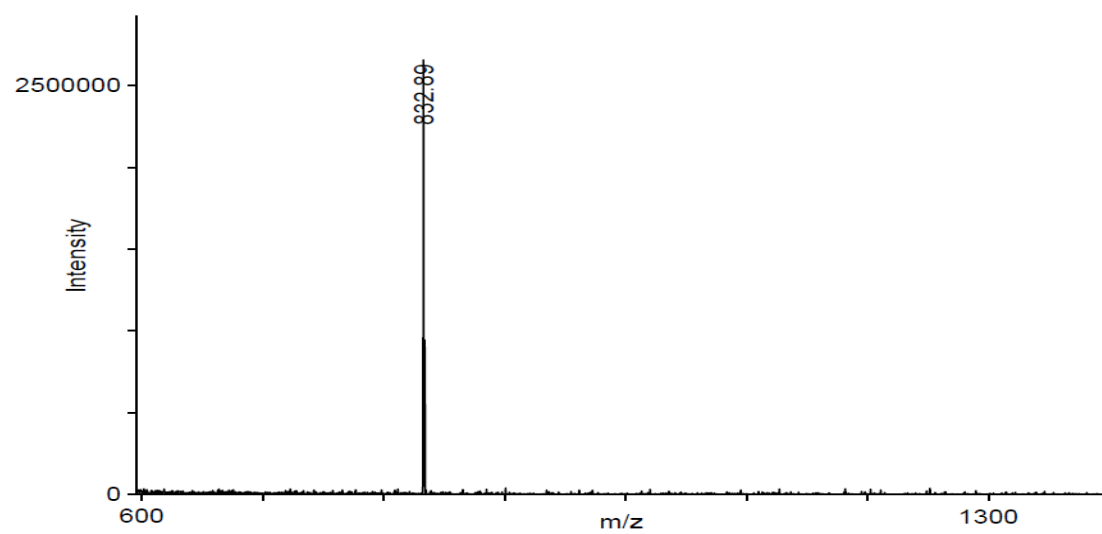

**11 Ala-Nle**

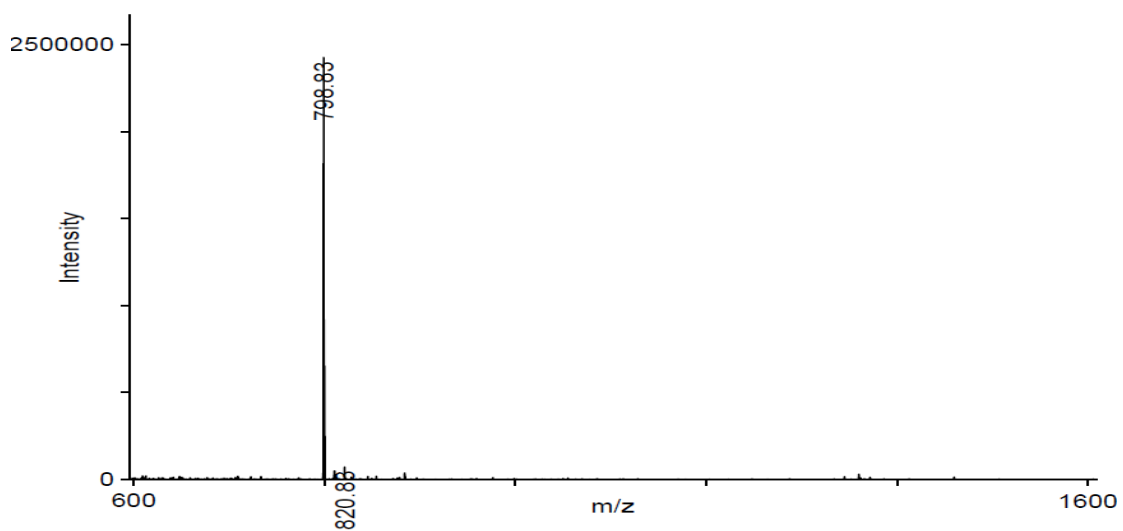

**11 D-Val-D-Thr**

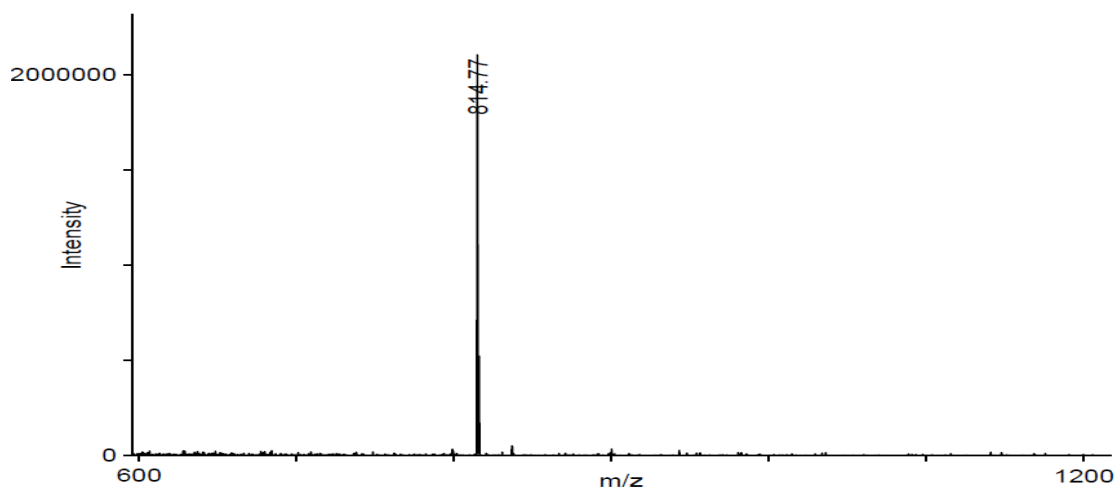

### 11 D-Val-Gly

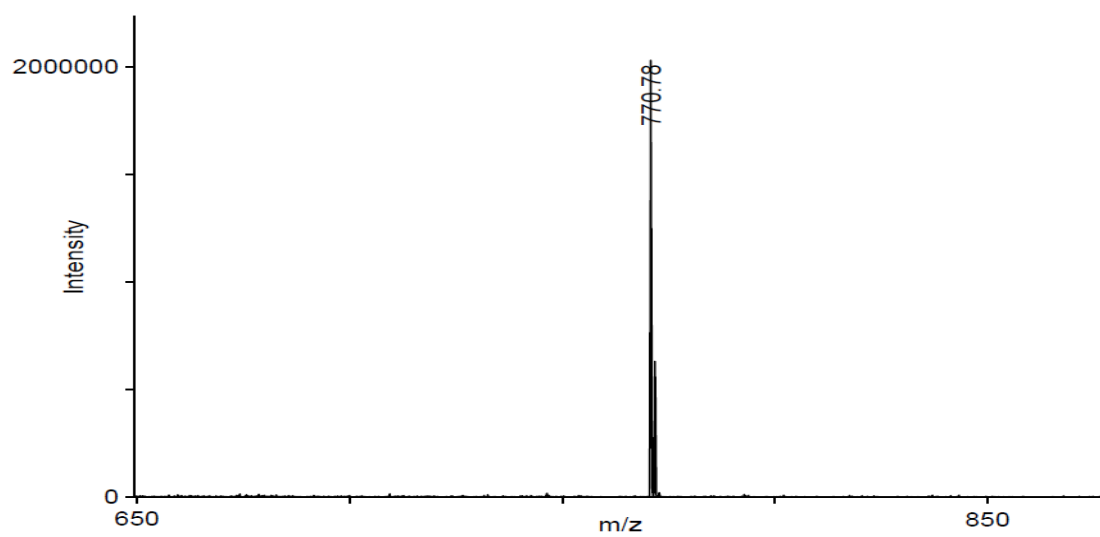

### 11 D-Val-Ala

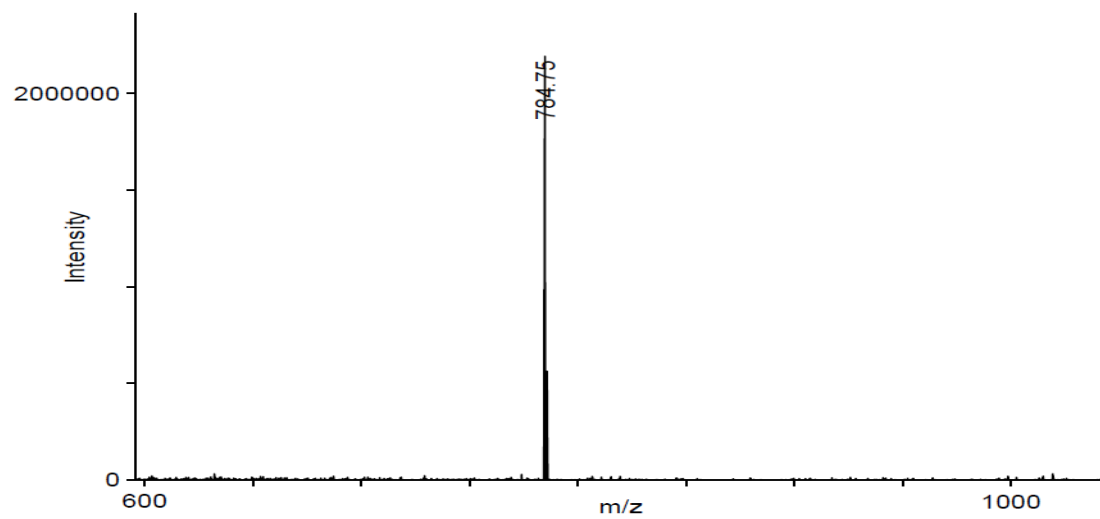

### 11 D-Val-D-Val

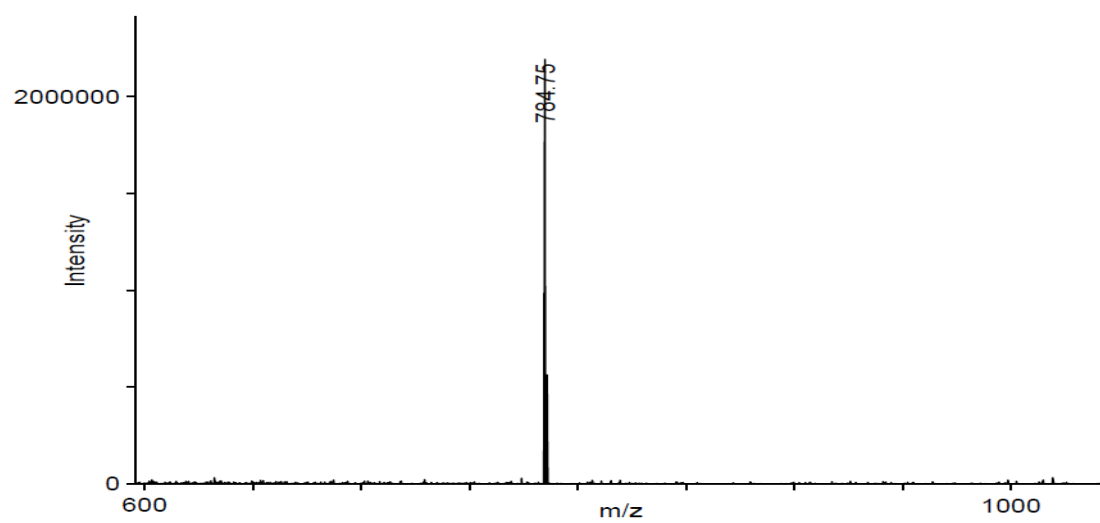

### 11 D-Val-Pro

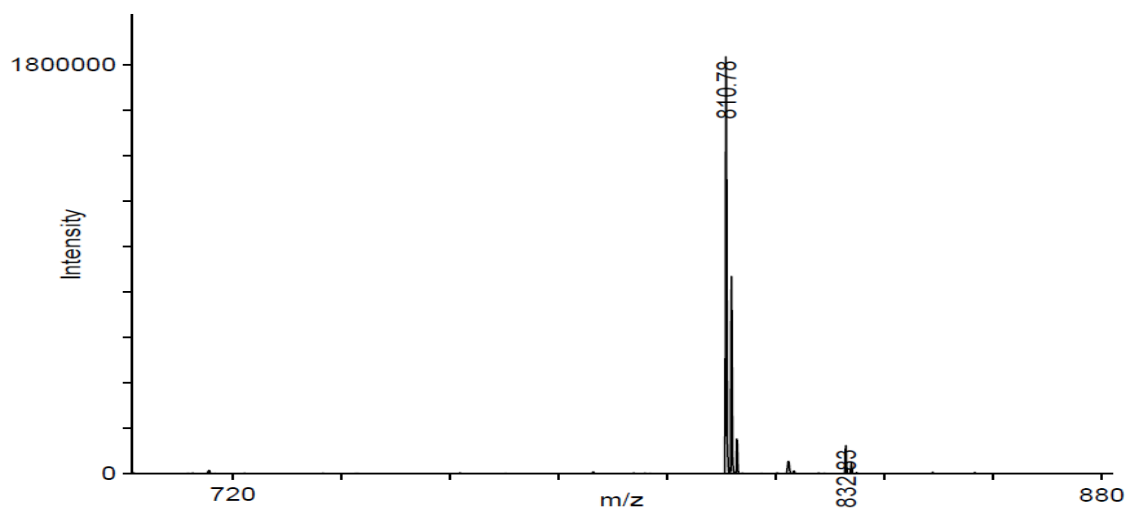

### 11 D-Val-Lys

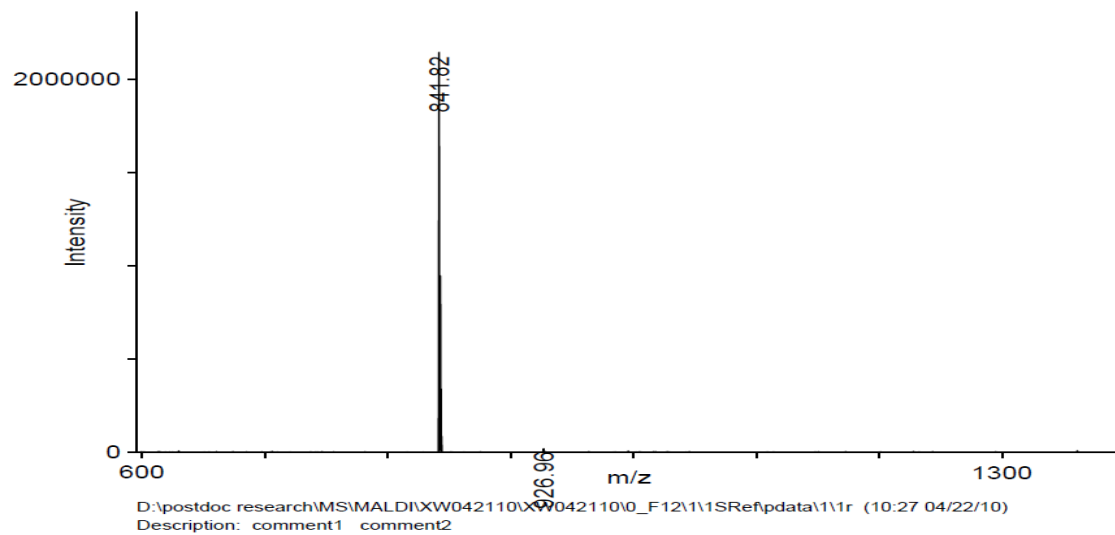

### 11 D-Val-Trp

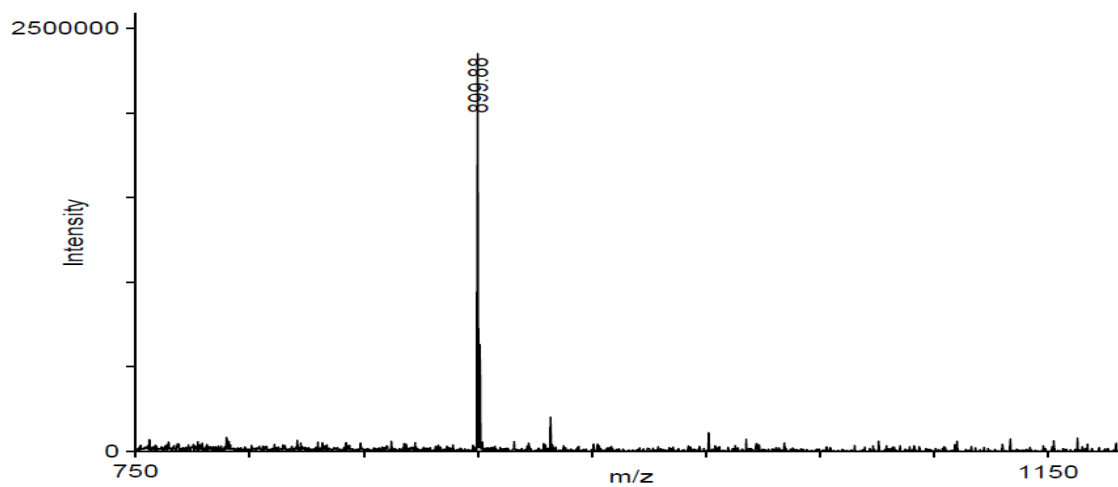



### 11 D-Val-Asp

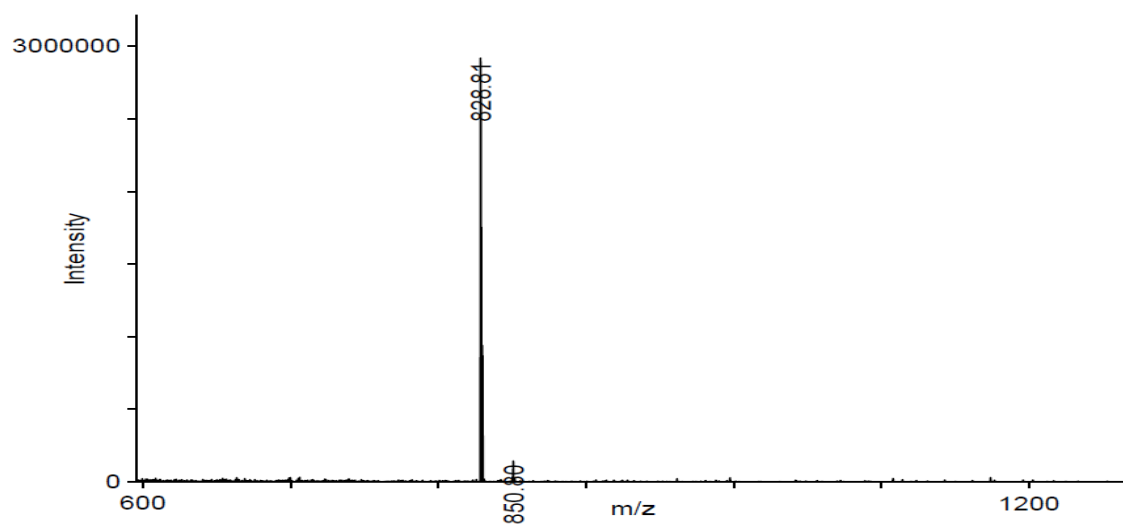

### 11 D-Val-D-Phe

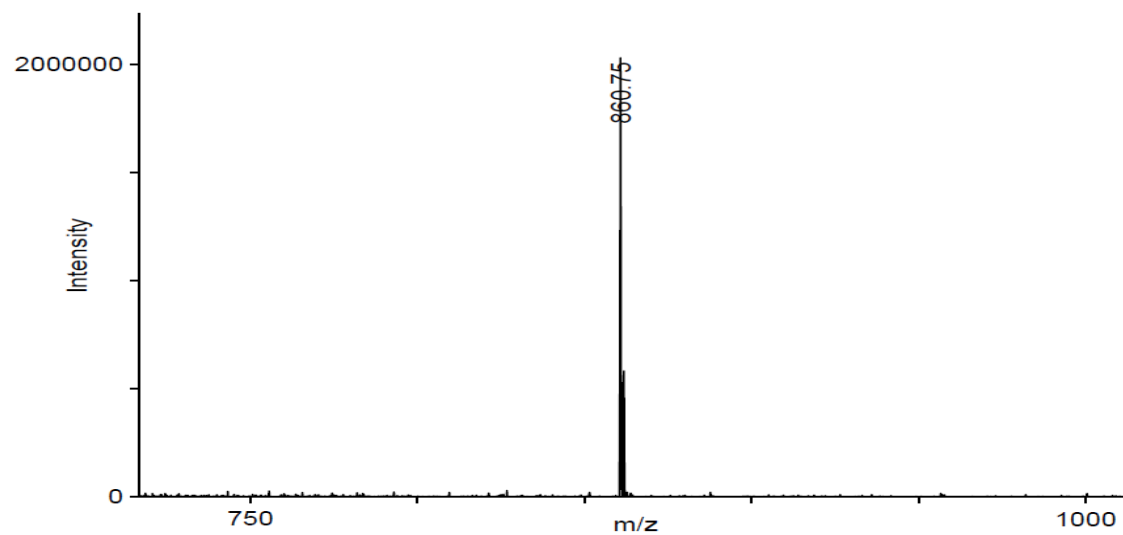

### 11 D-Val-Nle

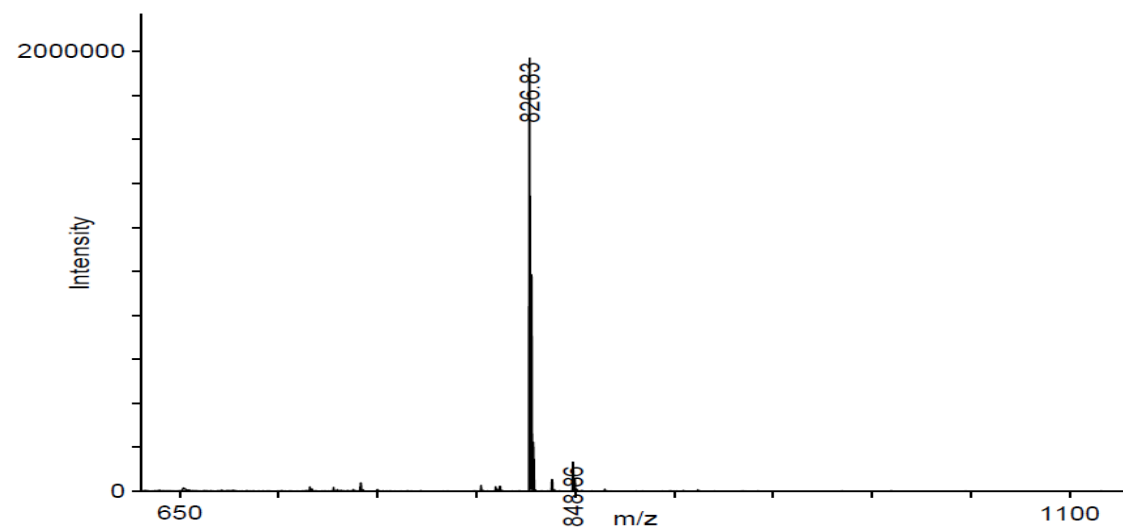

### 11 Pro-D-Thr

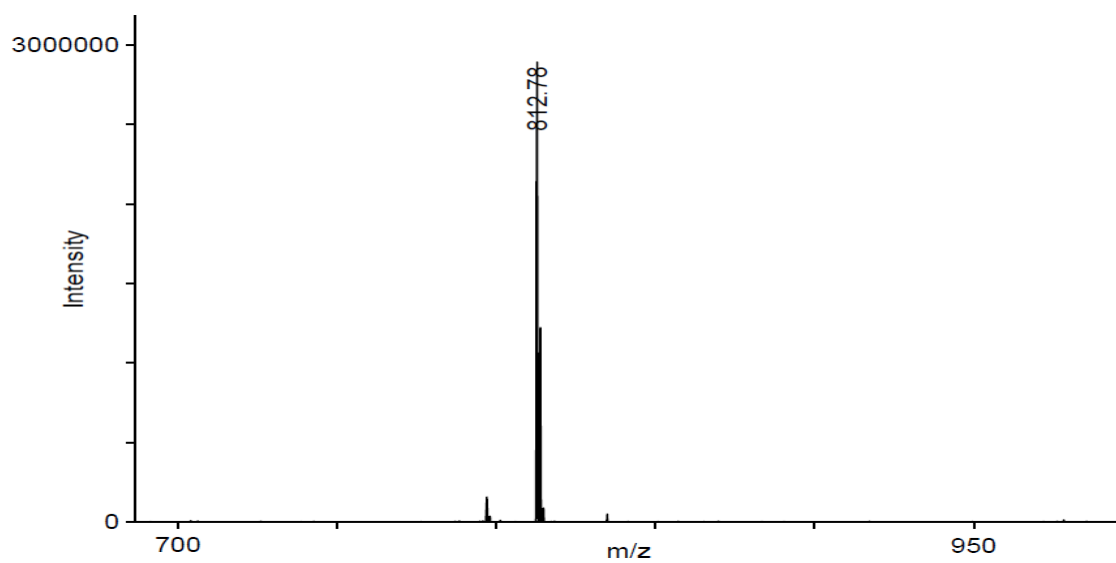

### 11 Pro-Gly

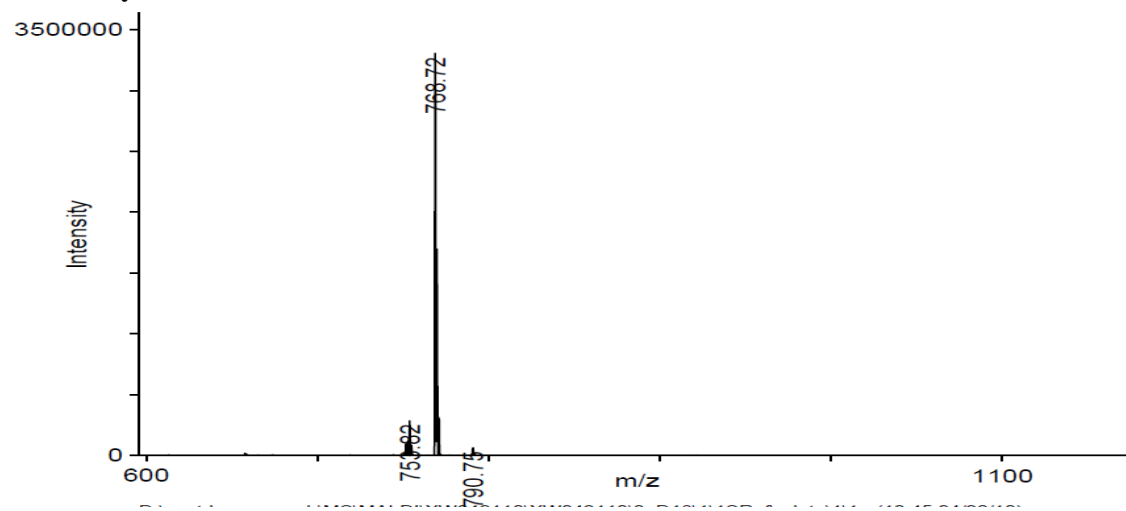

### 11 Pro-Ala

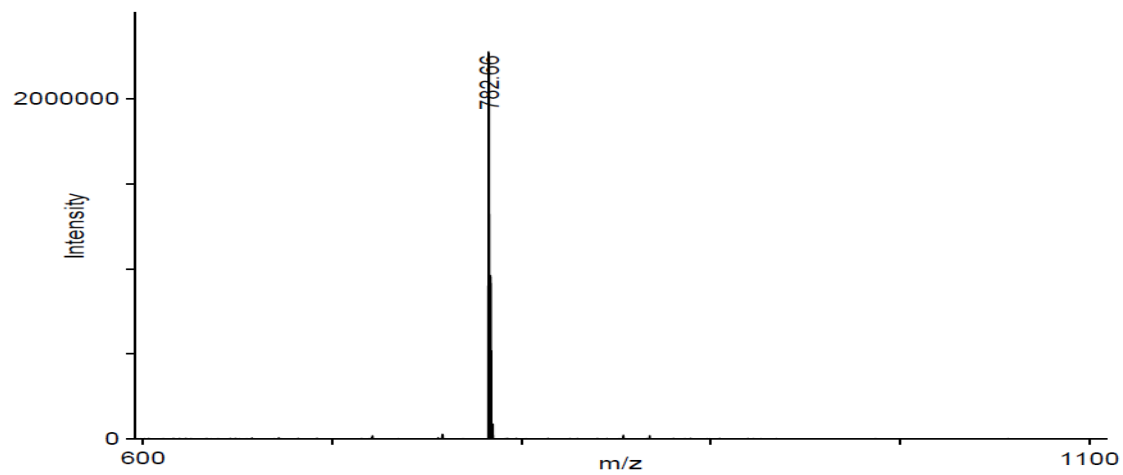

### 11 Pro-D-Val

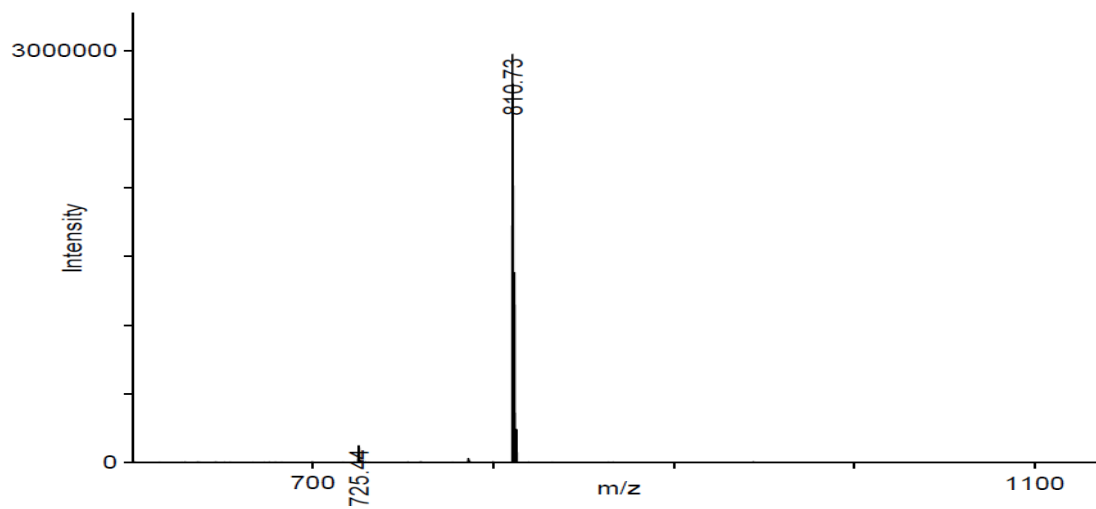

### 11 Pro-Pro

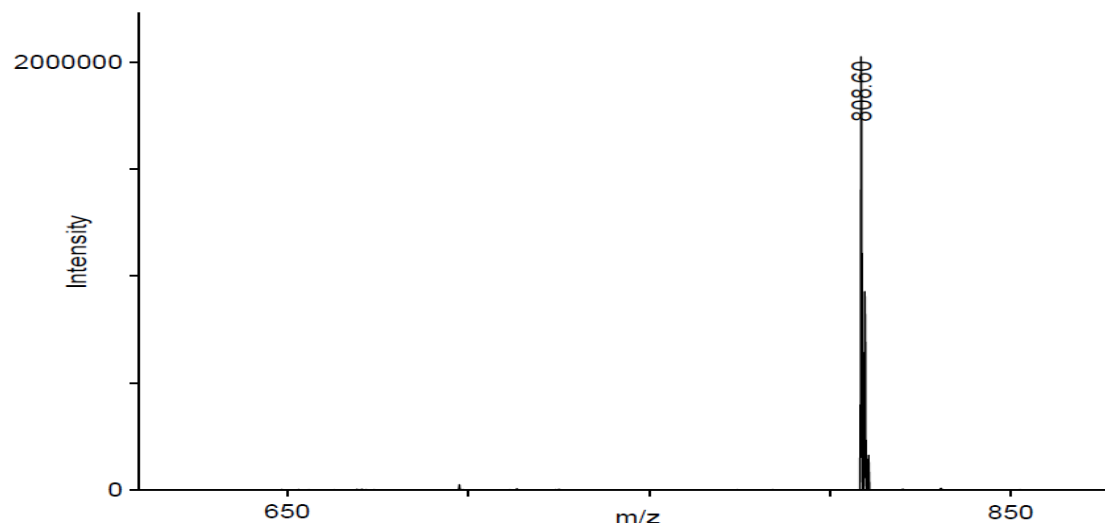

### 11 Pro-Lys

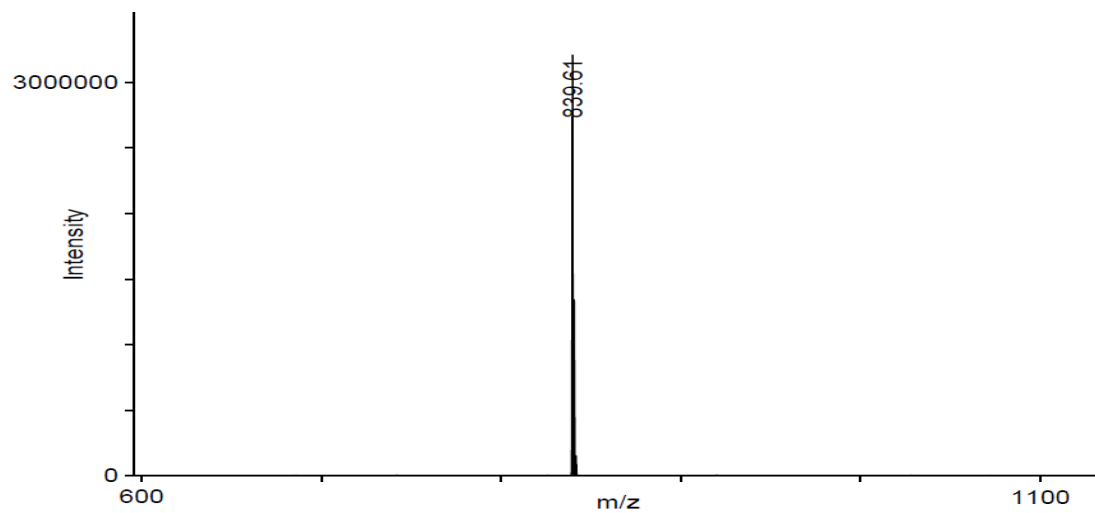

### 11 Pro-Trp

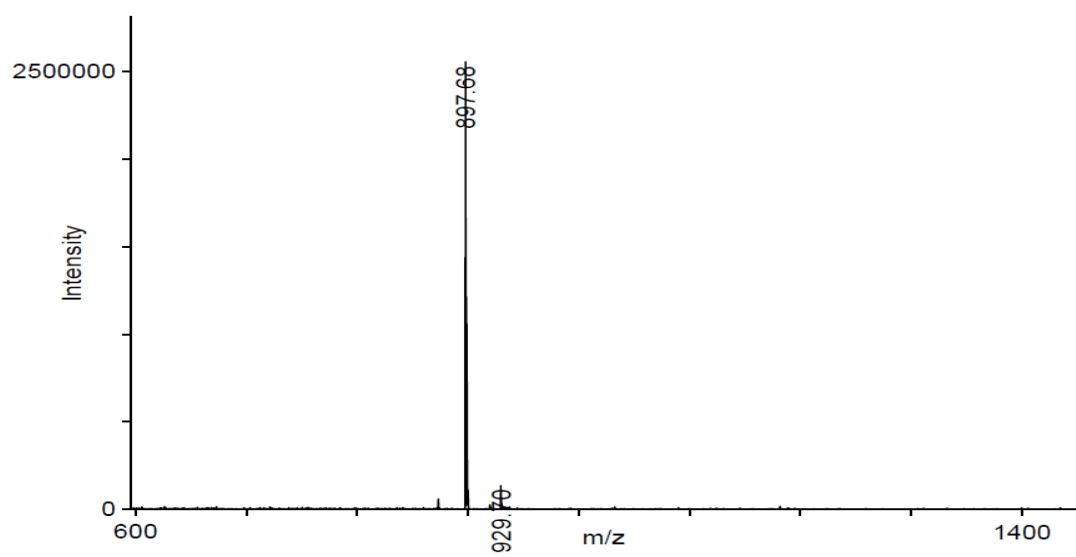

### 11 Pro-Asp

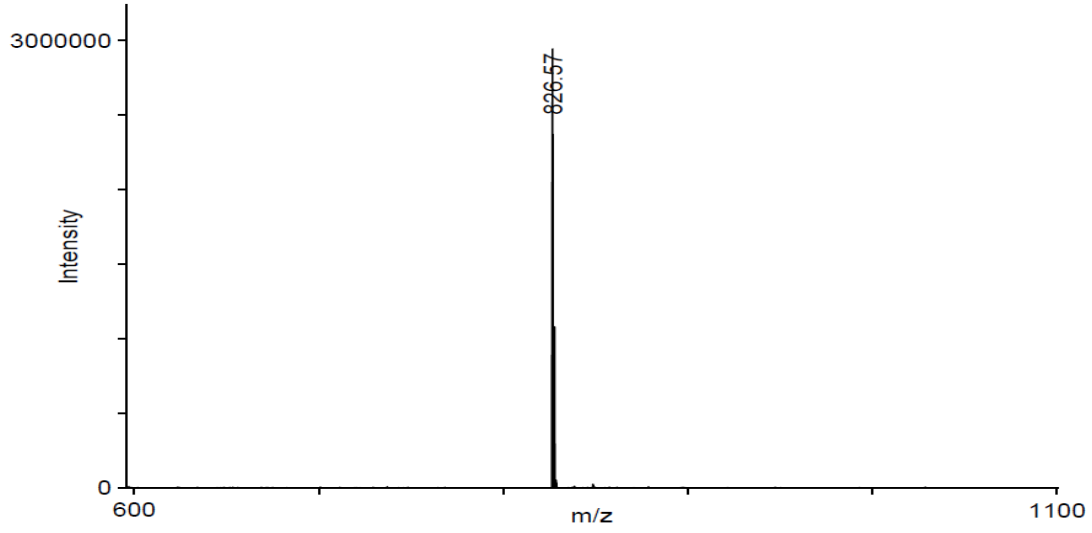

### 11 Pro-D-Phe

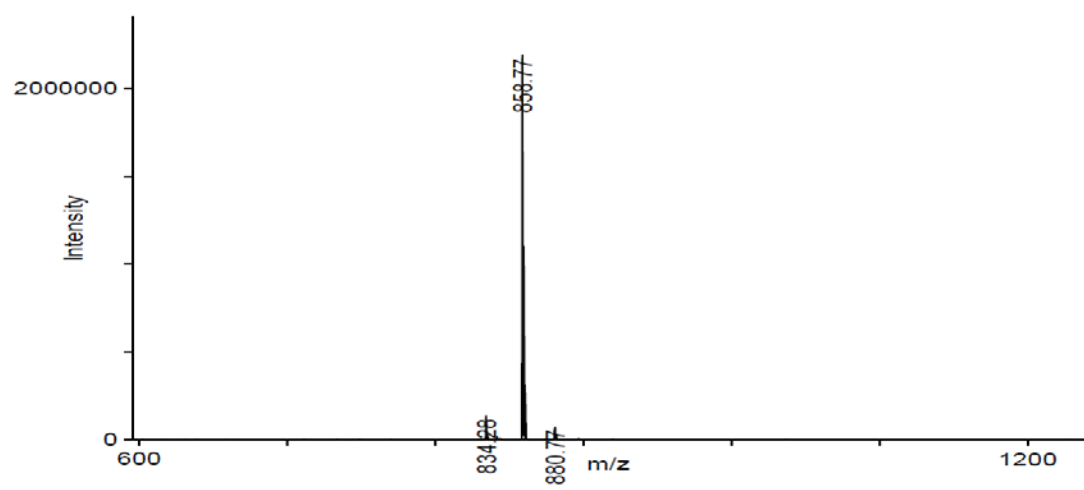

### 11 Pro-Nle

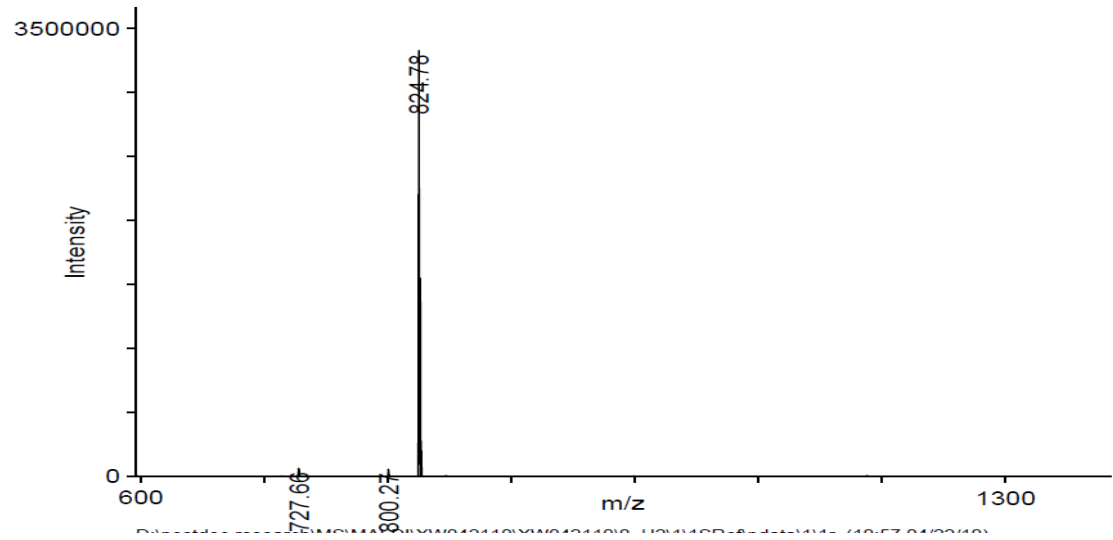

### 11 Lys-D-Thr

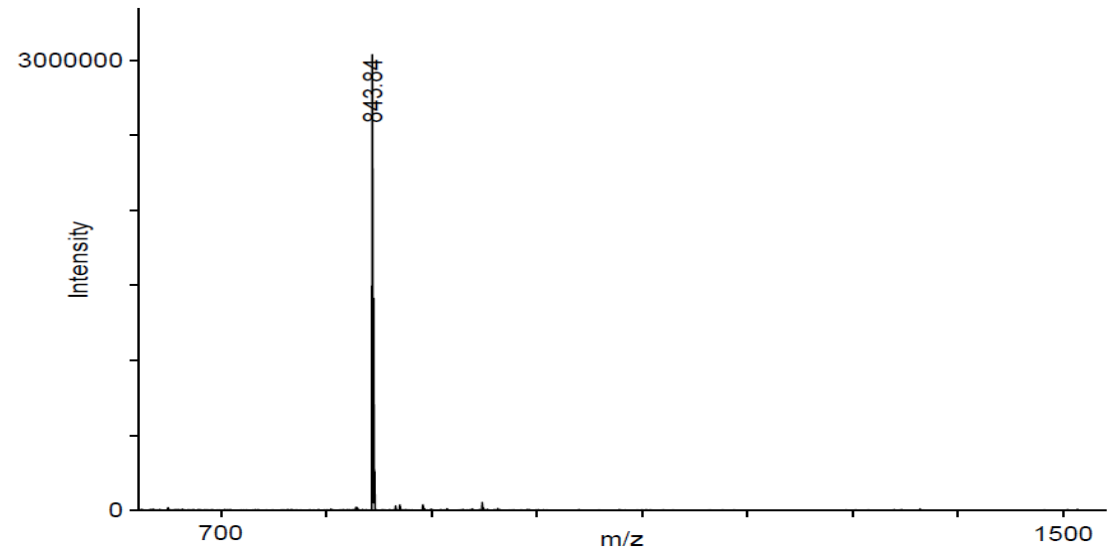

### 11 Lys-Gly

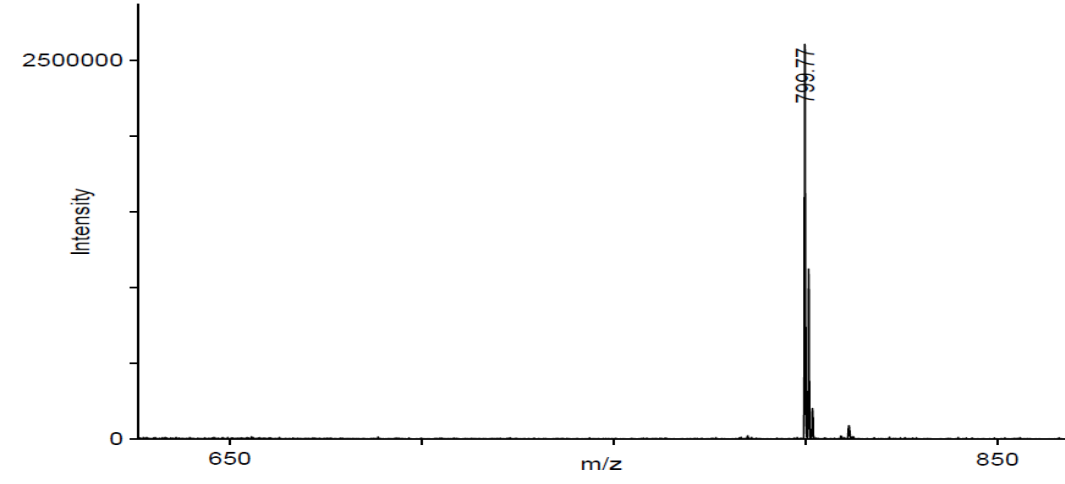

### 11 Lys-Ala

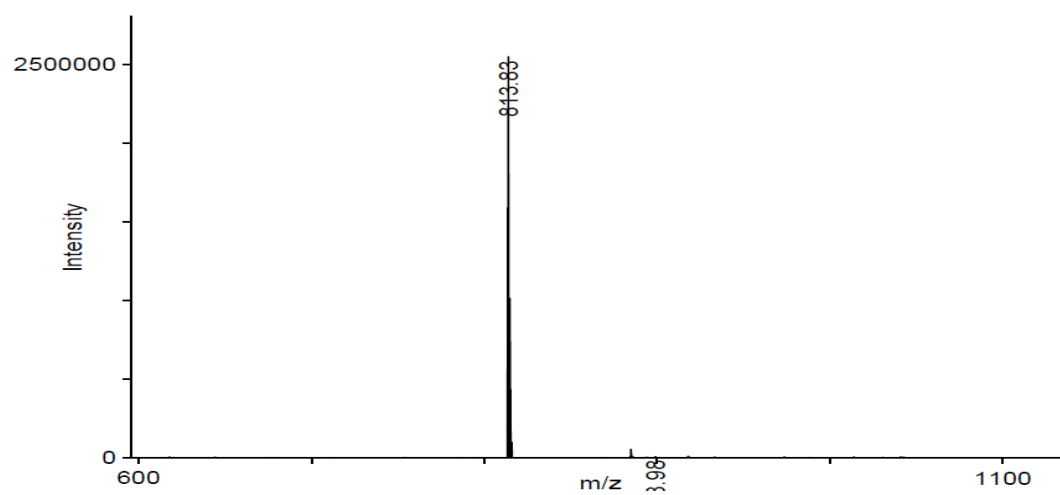

### 11 Lys-D-Val

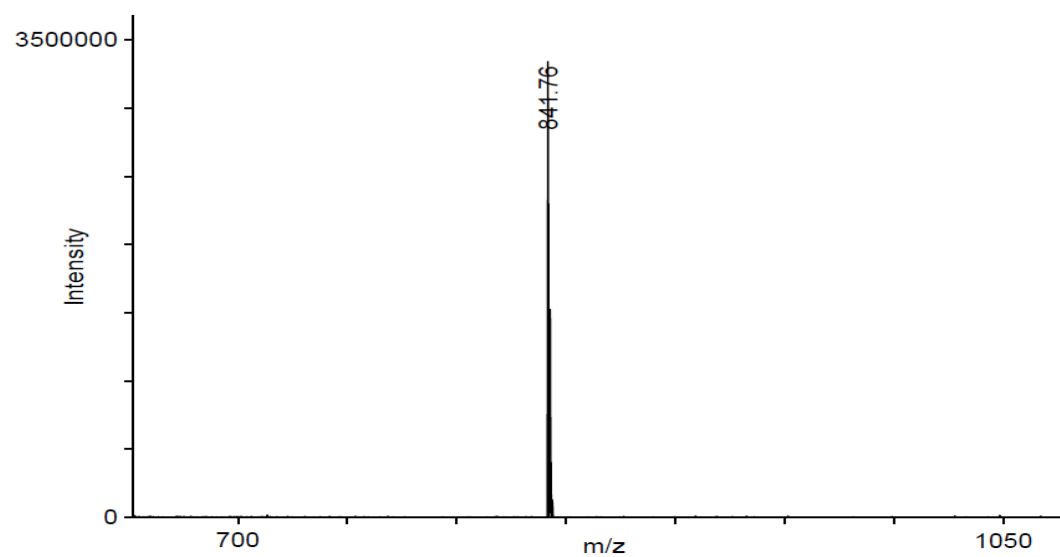

### 11 Lys-Pro

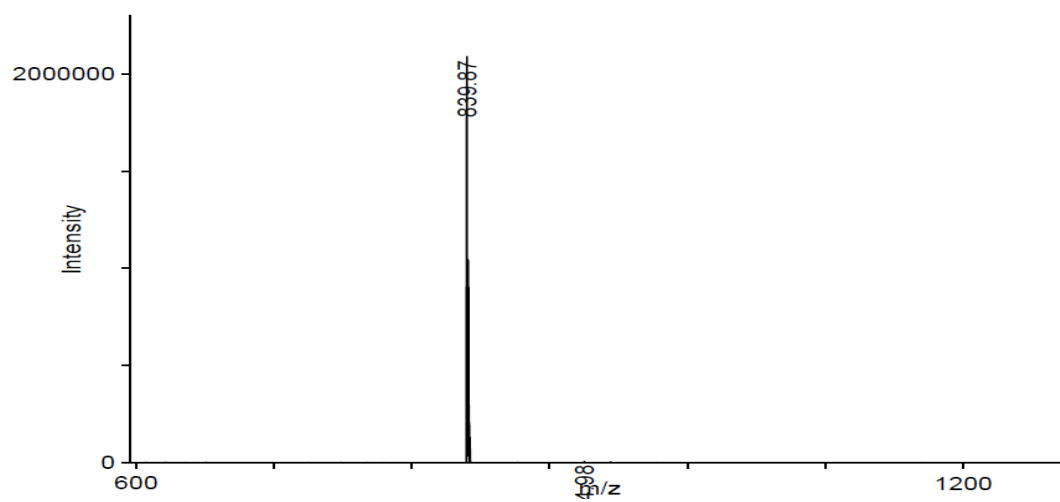

### 11 Lys-Lys

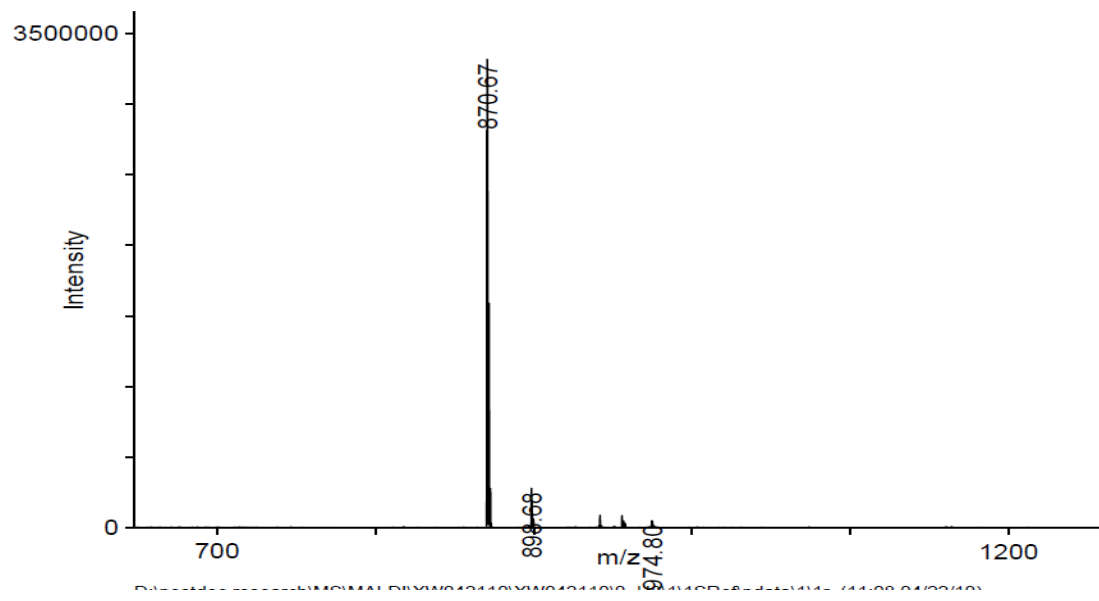

### 11 Lys-Trp

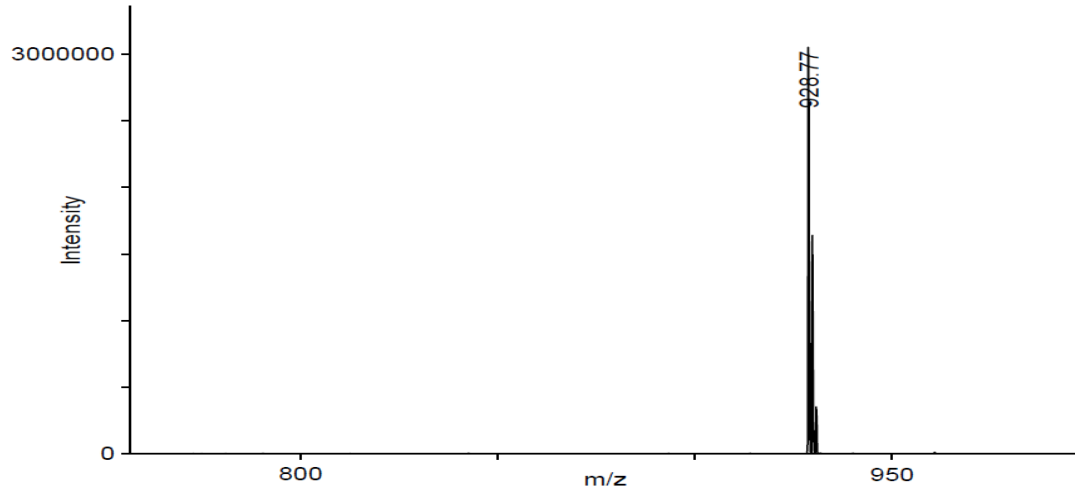

### 11 Lys-Asp

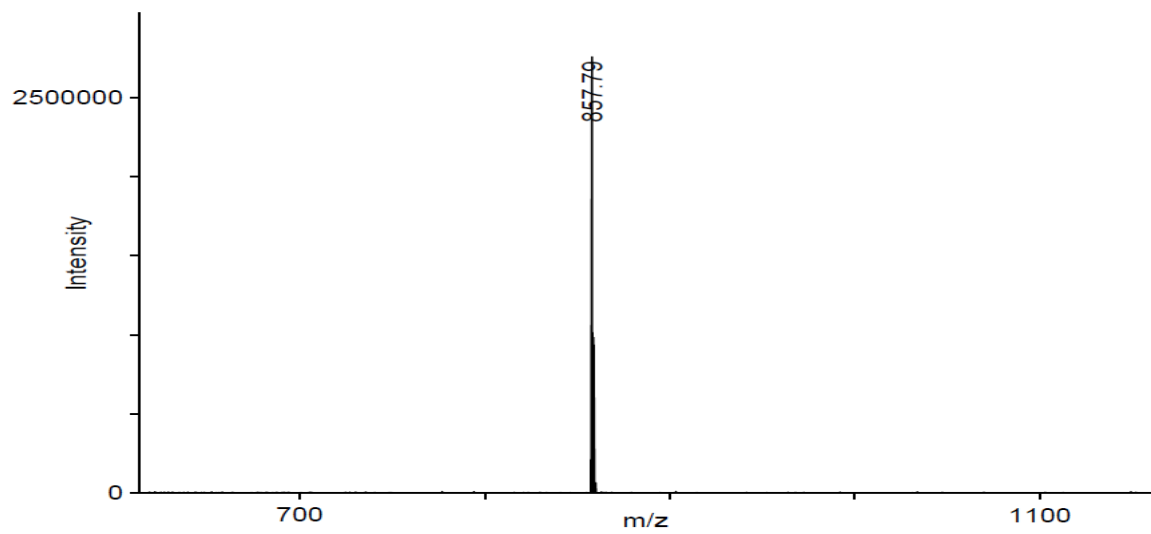

### 11 Lys-D-Phe

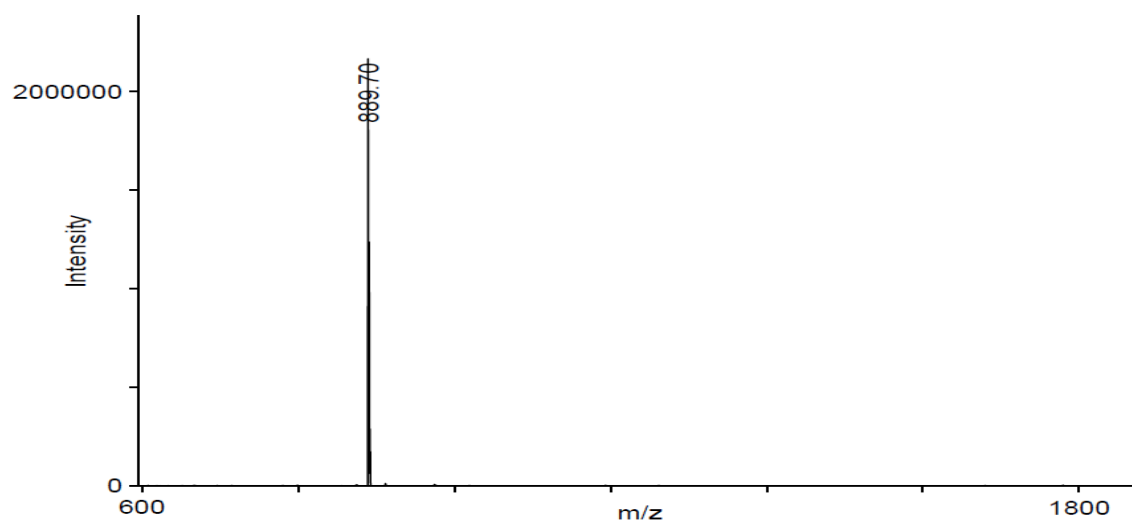

### 11 Lys-Nle

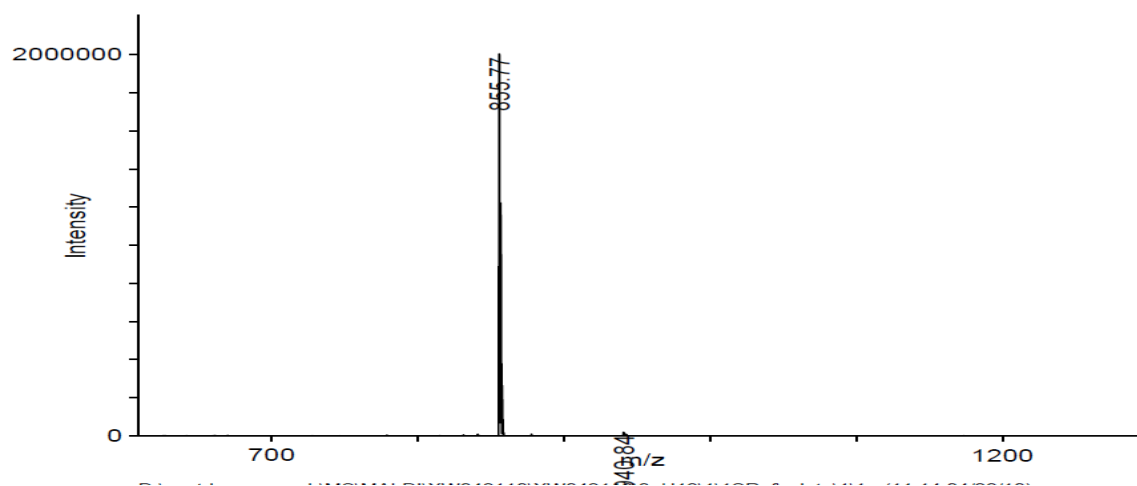

### 11 Trp-D-Thr

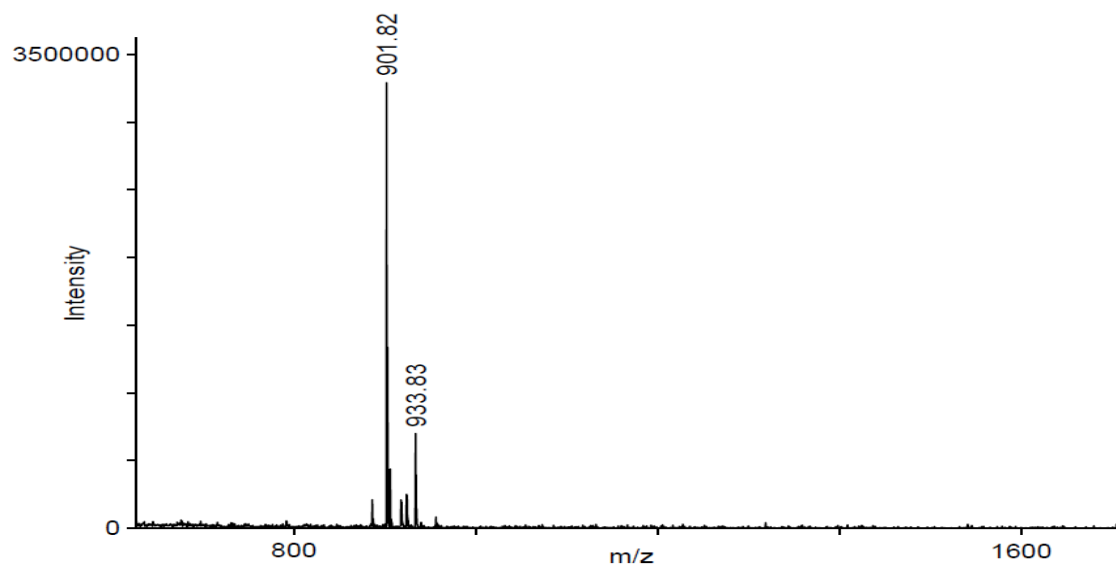



### 11 Trp-Gly

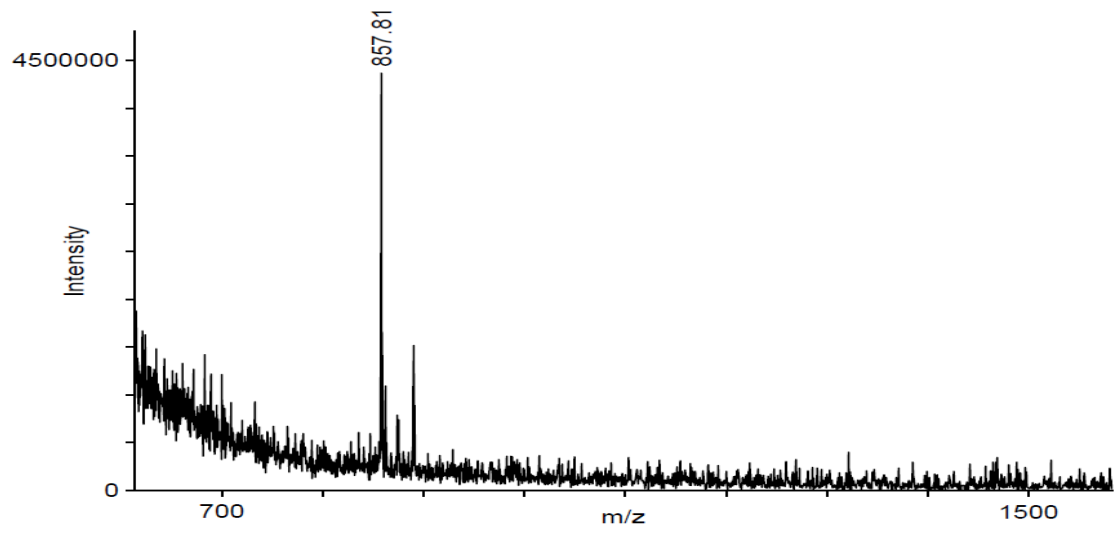

### 11 Trp-Ala

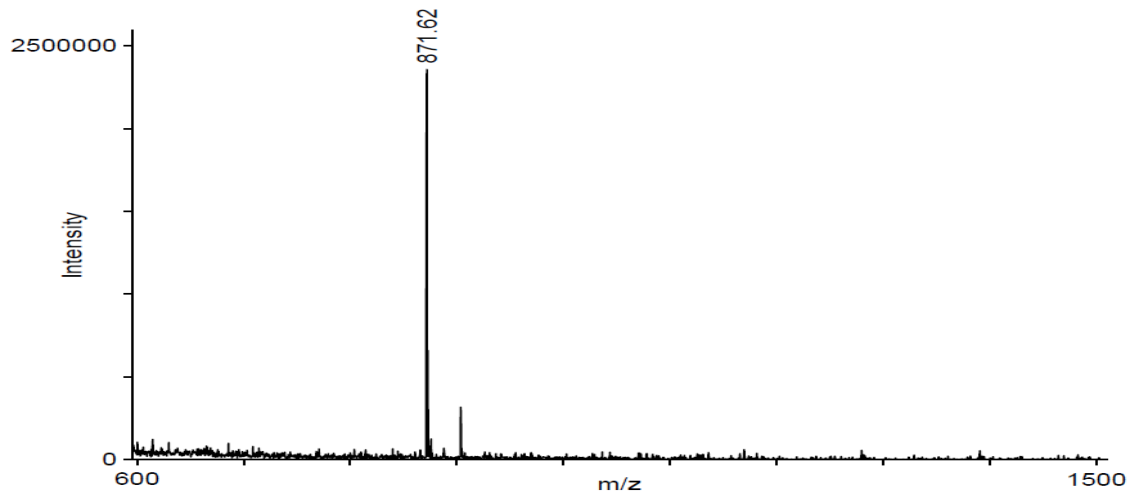

### 11 Trp-D-Val

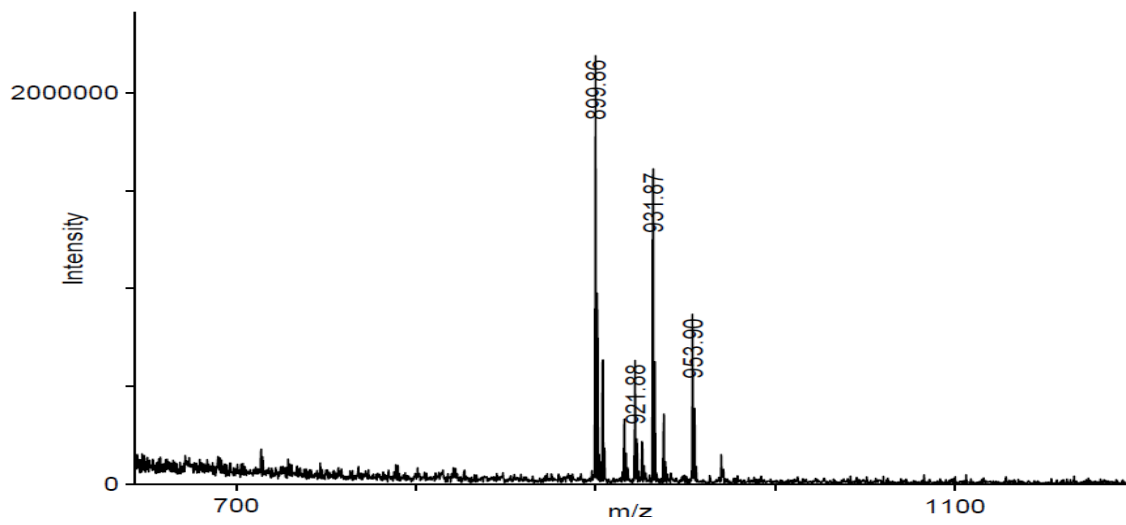

### 11 Trp-Pro

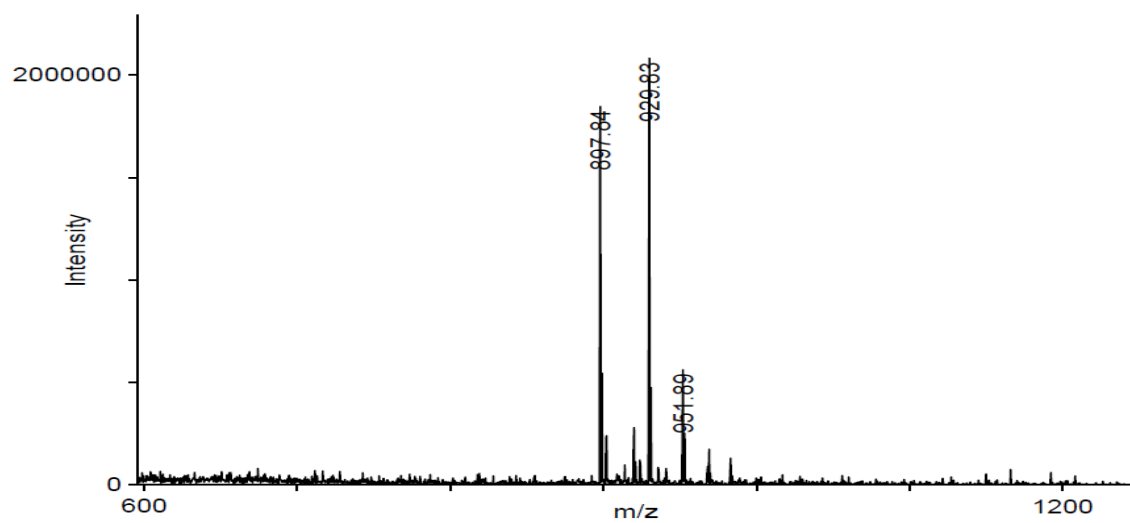

### 11 Trp-Lys

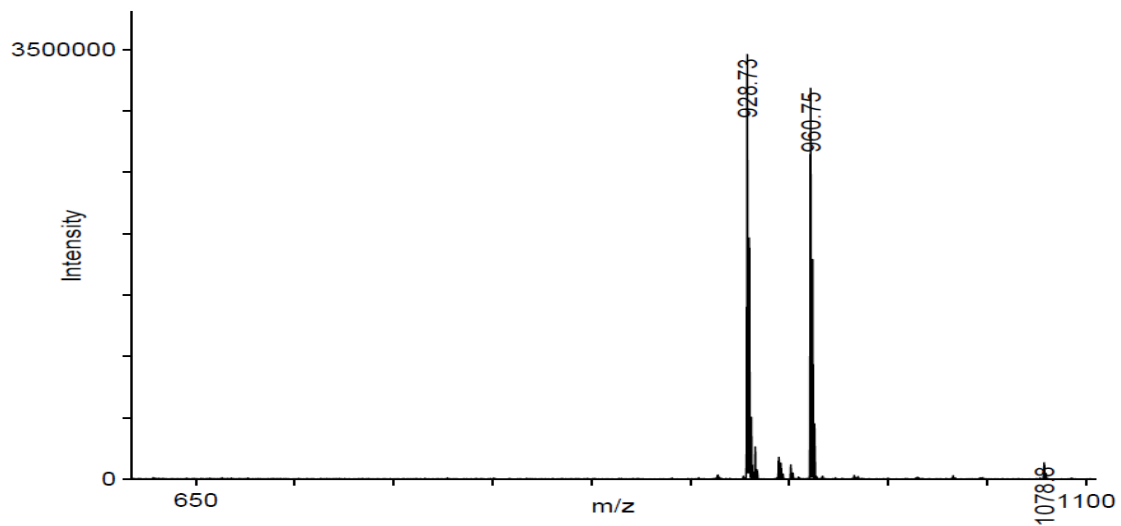

### 11 Trp-Asp

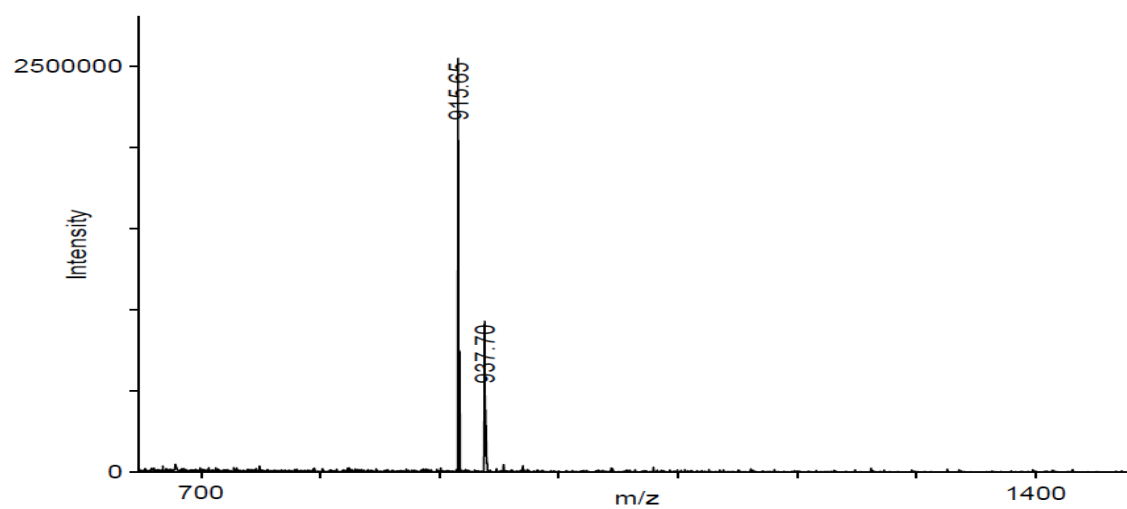

### 11 Trp-D-Phe

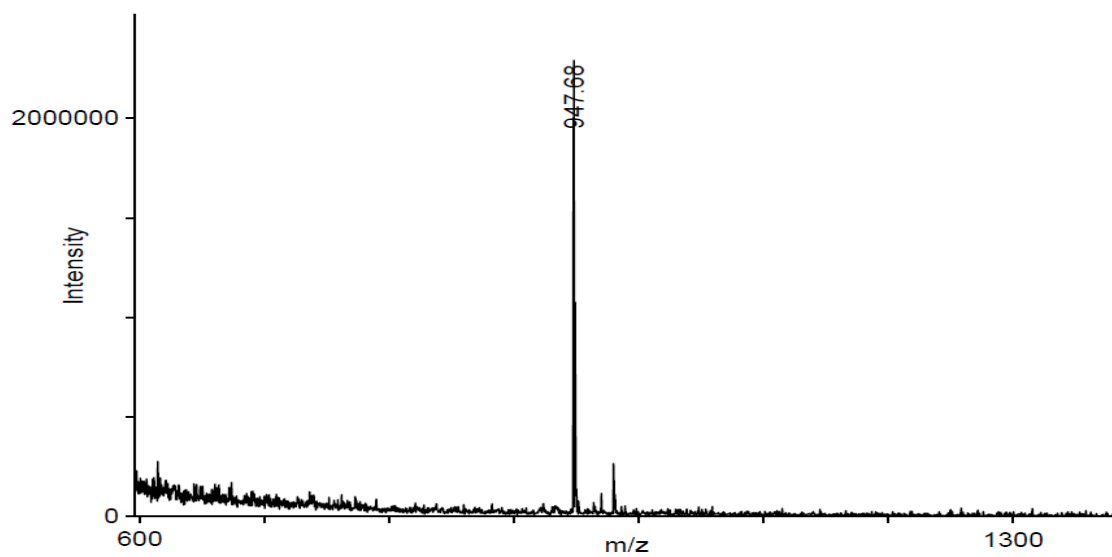

### 11 Trp-Nle

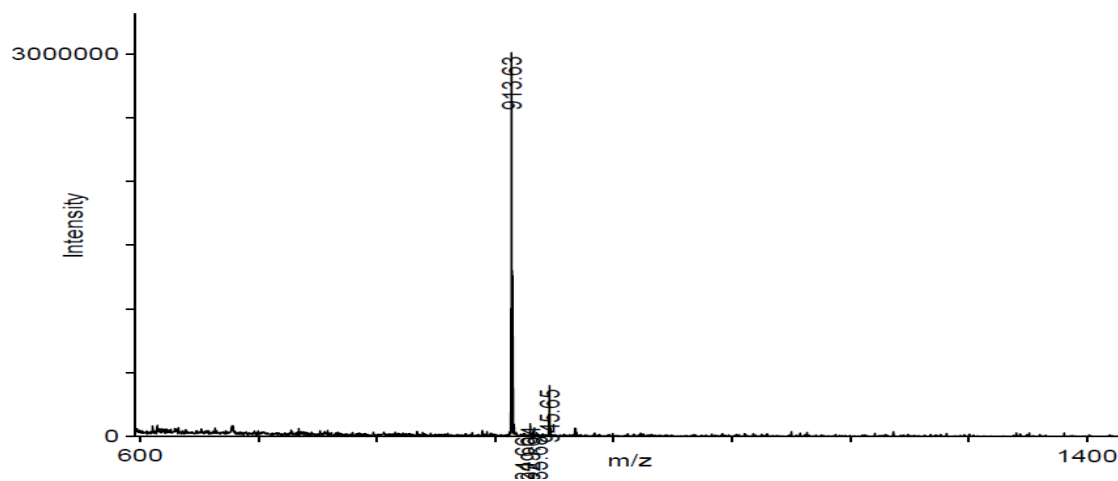

### 11 Asp-D-Thr

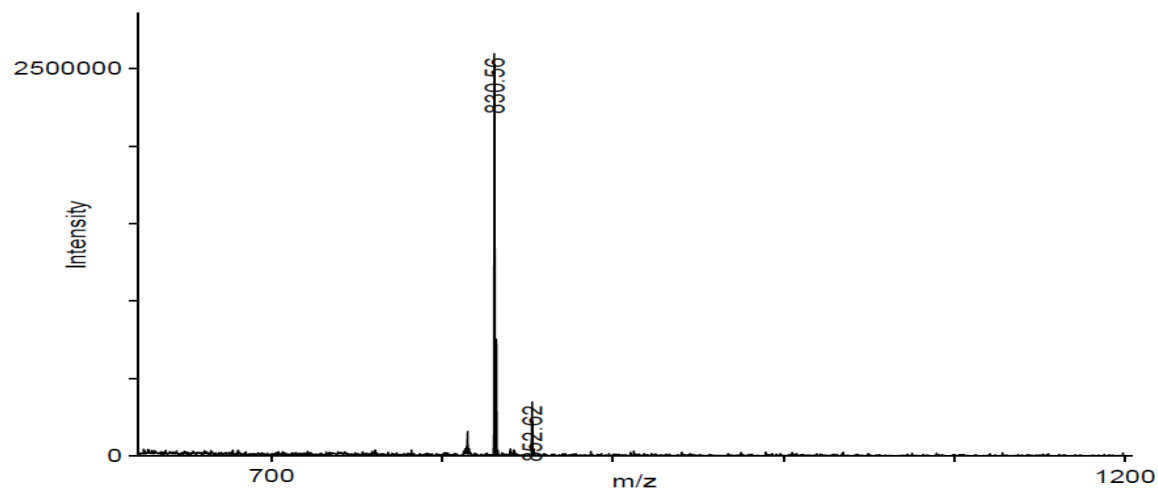

### 11 Asp-Gly

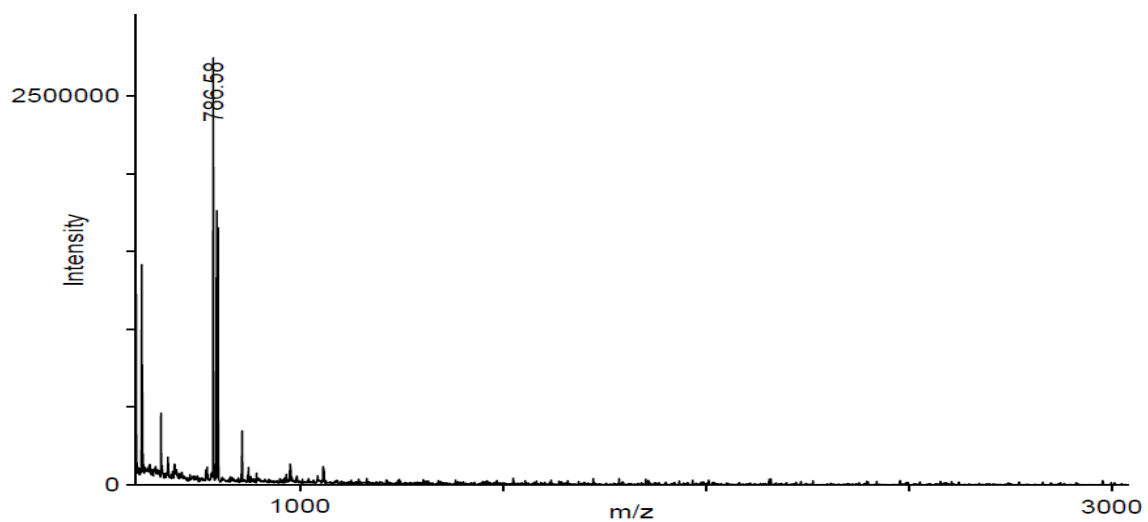

### 11 Asp-Ala

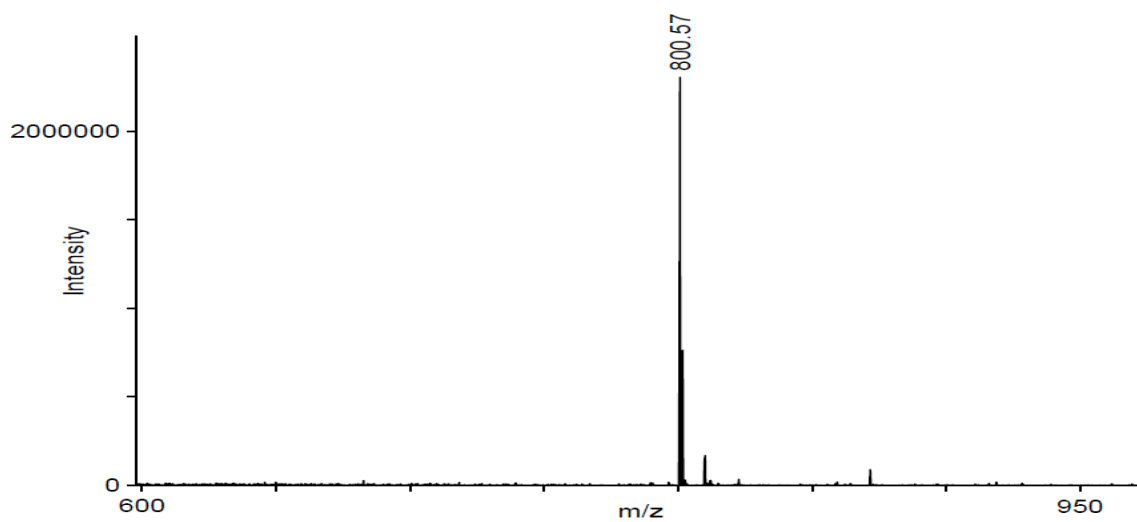

### 11 Asp-D-Val

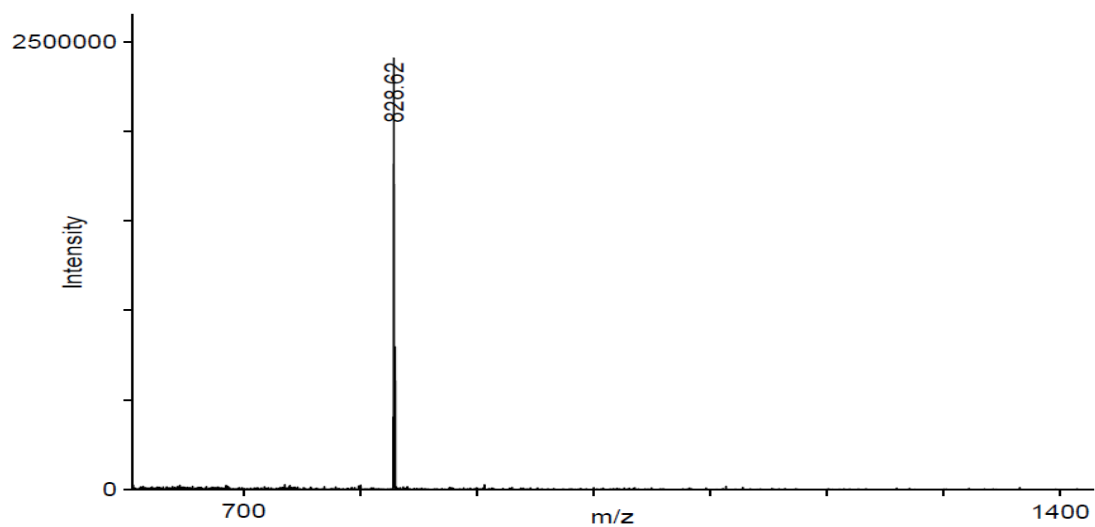

### 11 Asp-Pro

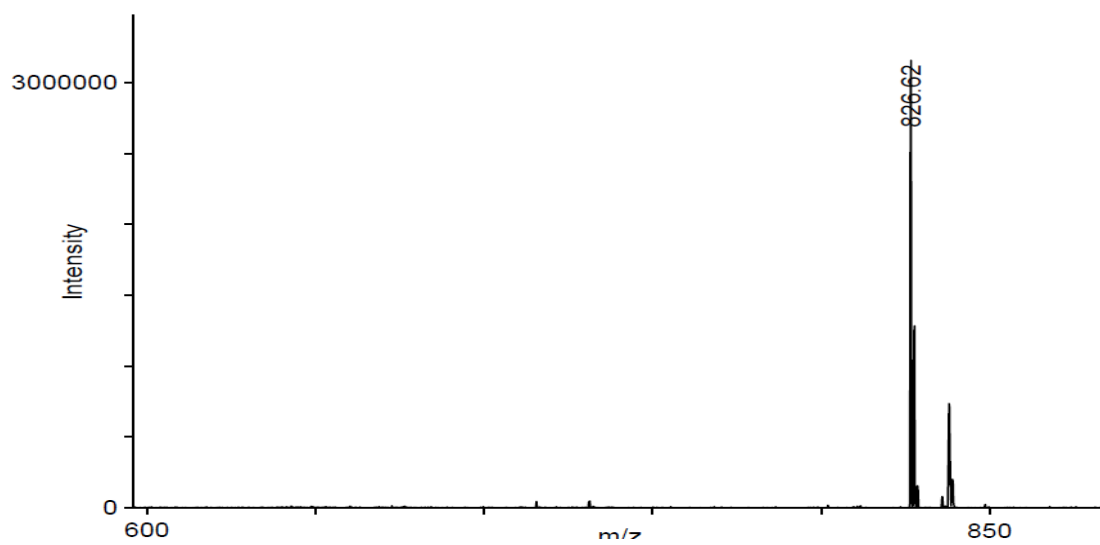

### 11 Asp-Lys

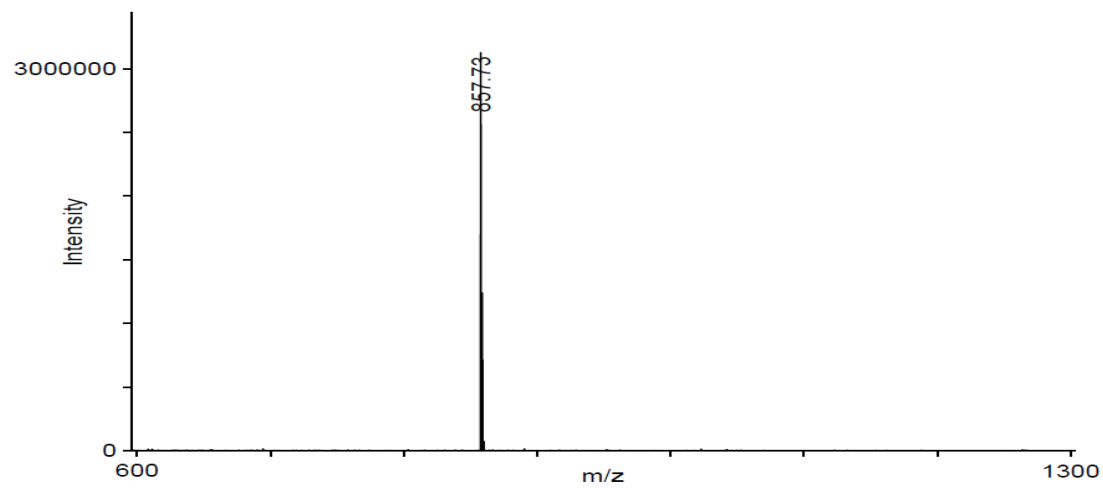

### 11 Asp-Asp

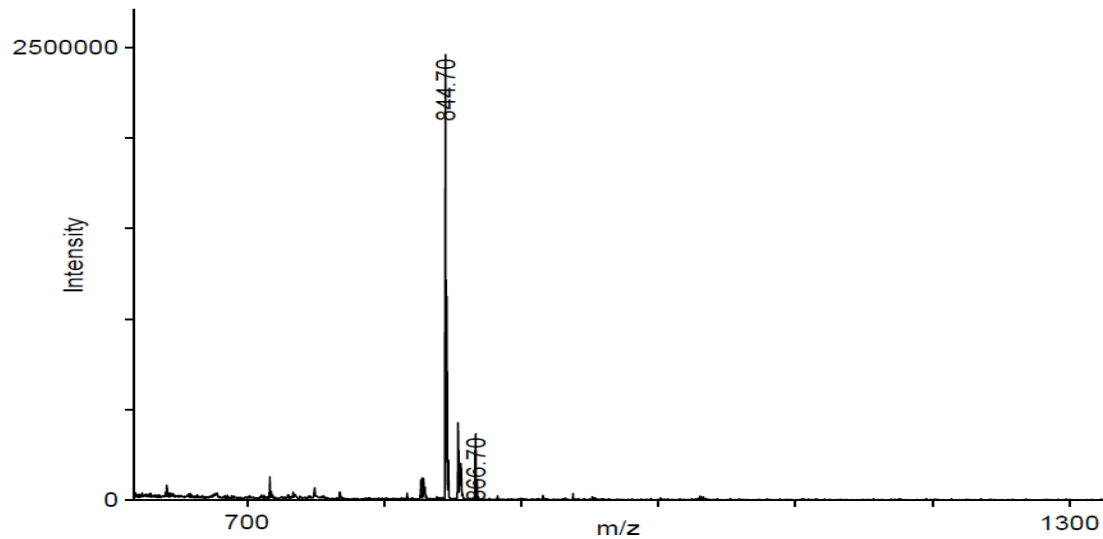

### 11 Asp-D-Phe

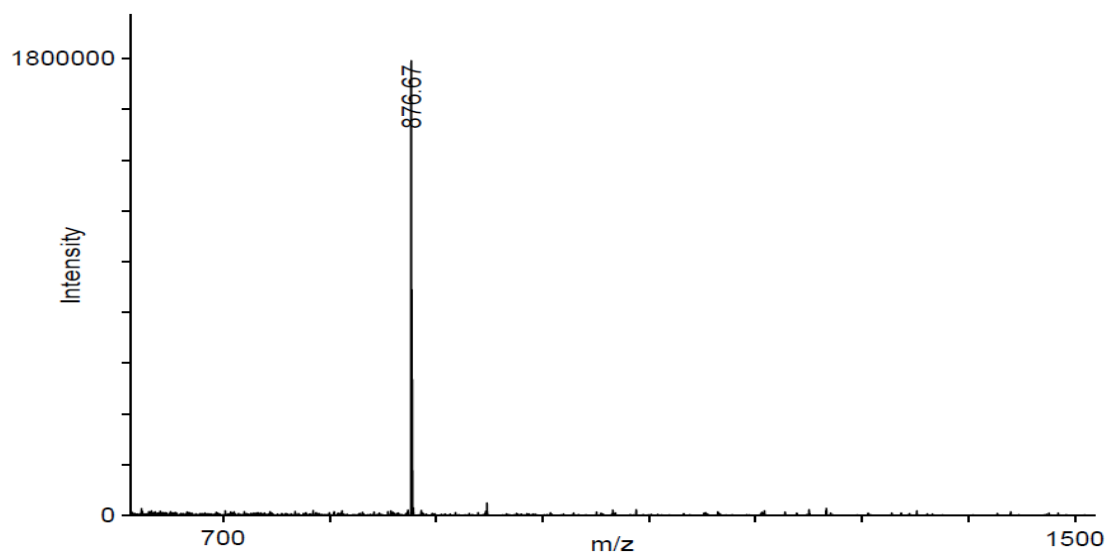

### 11 Asp-Nle

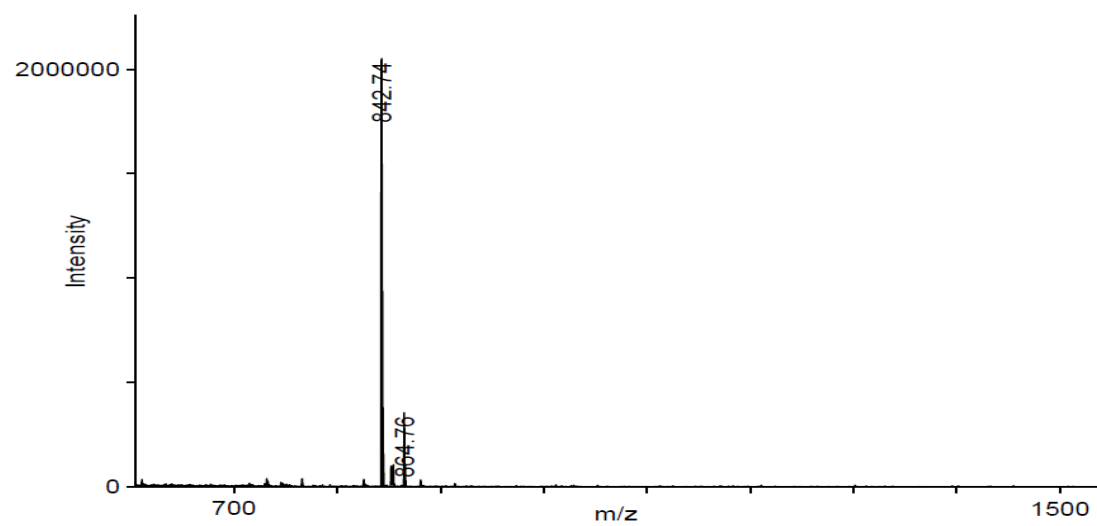

### 11 D-Phe-D-Thr

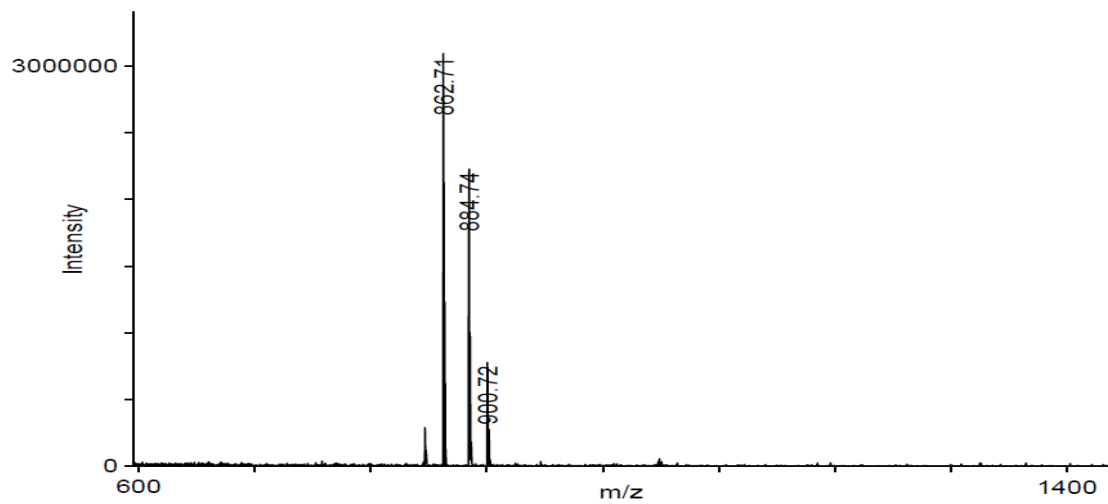

### 11 D-Phe-Gly

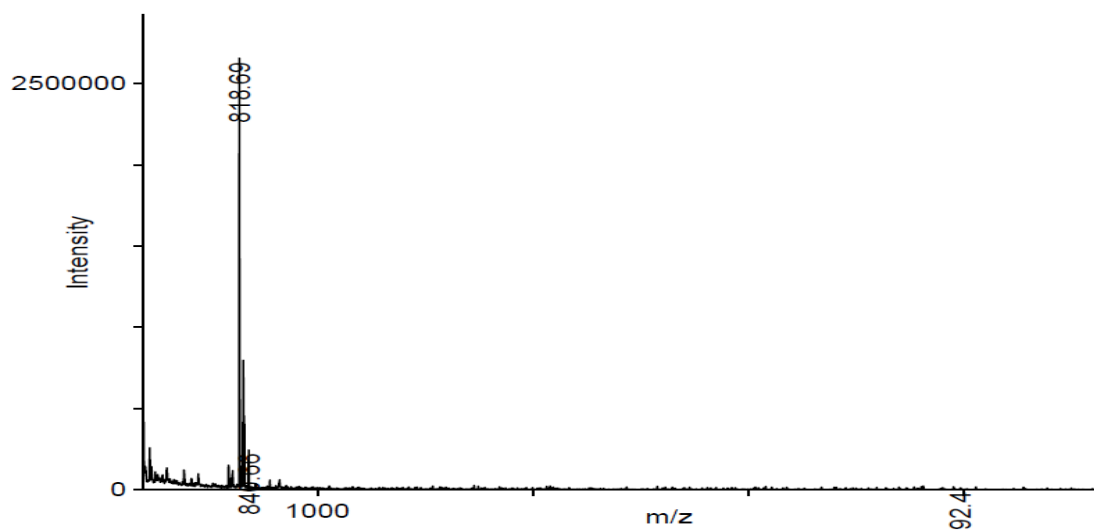

### 11 D-Phe-Ala

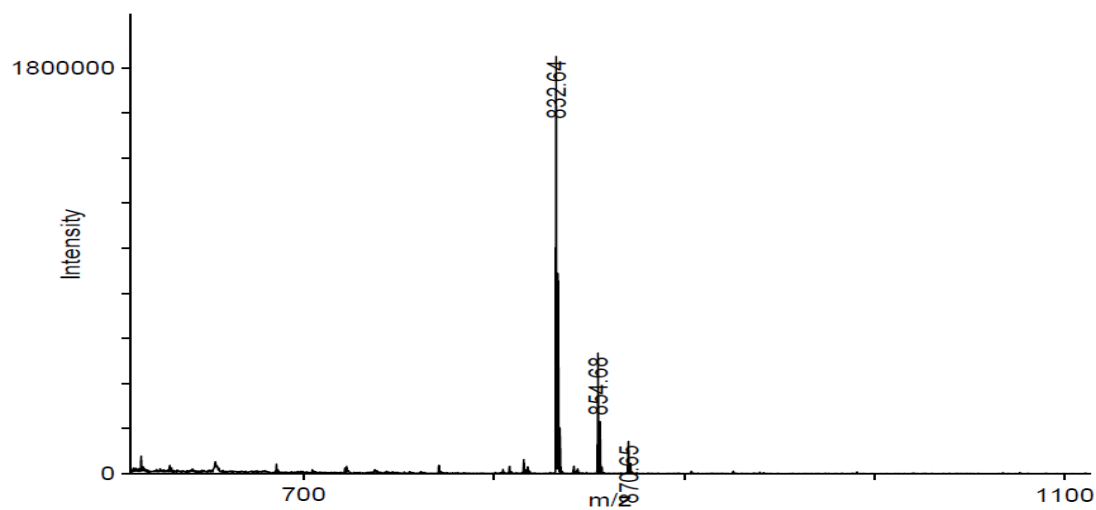

### 11 D-Phe-D-Val

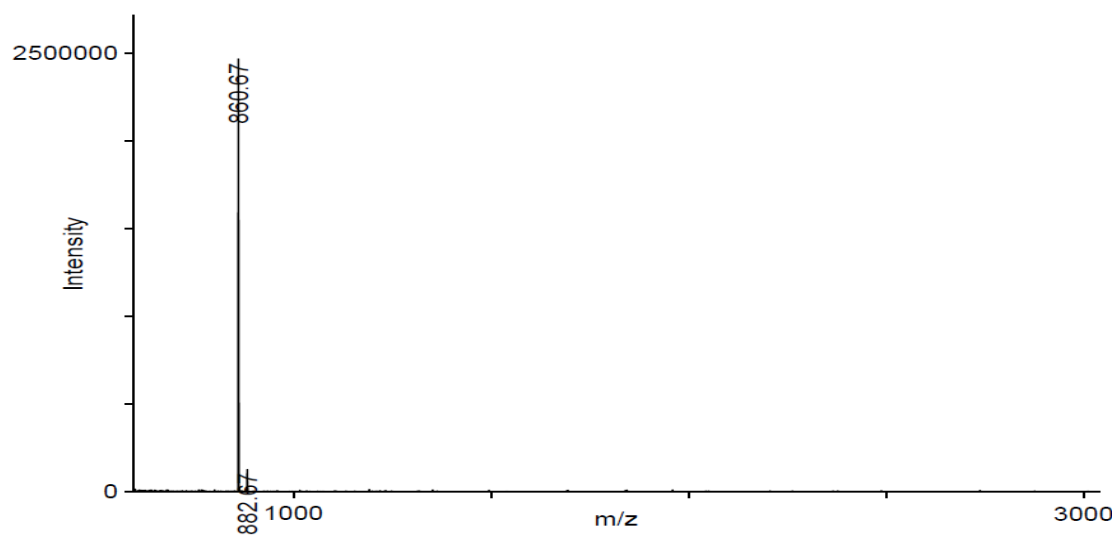

### 11 D-Phe-Pro

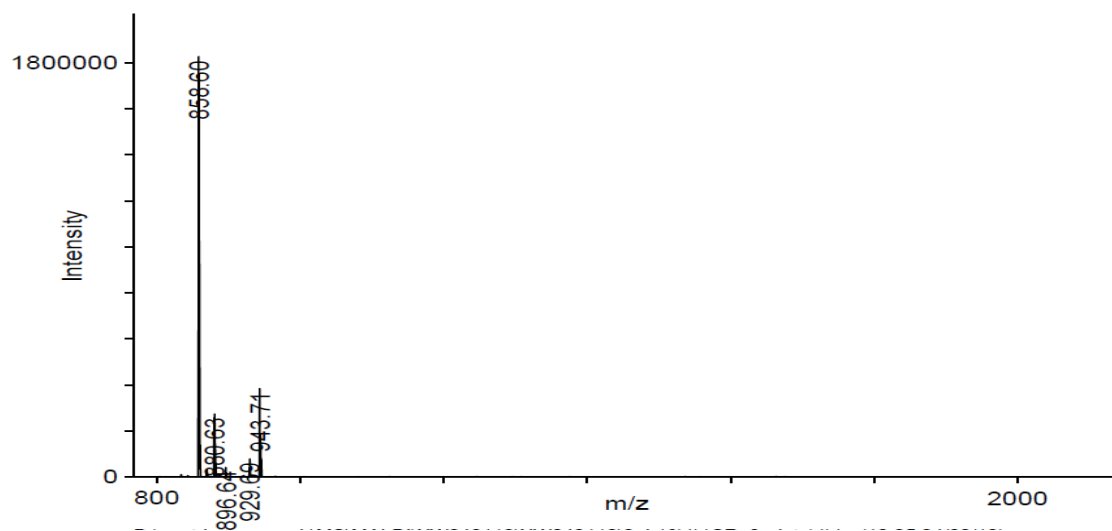

### 11 D-Phe-Lys

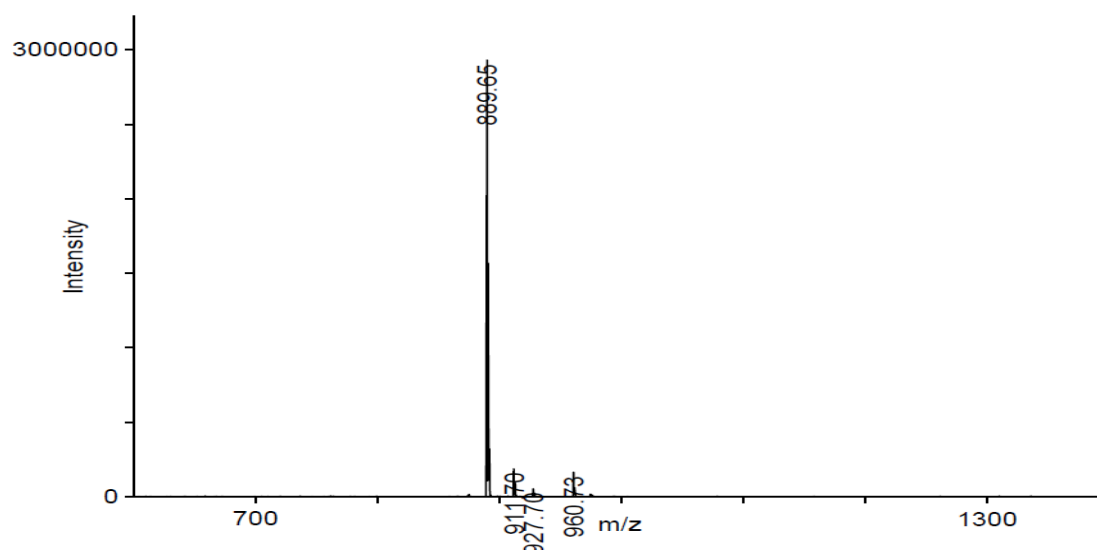

### 11 D-Phe-Trp

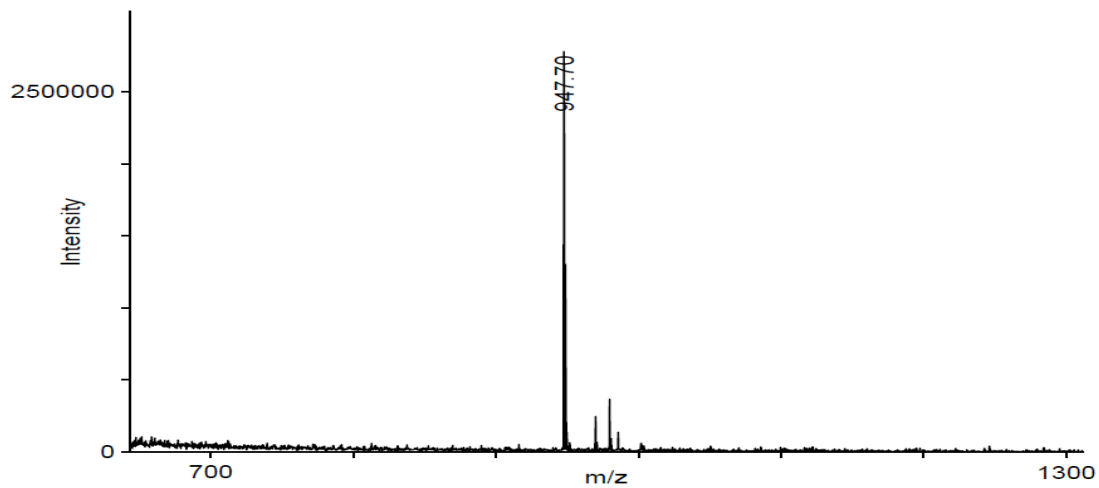



### 11 D-Phe-Asp

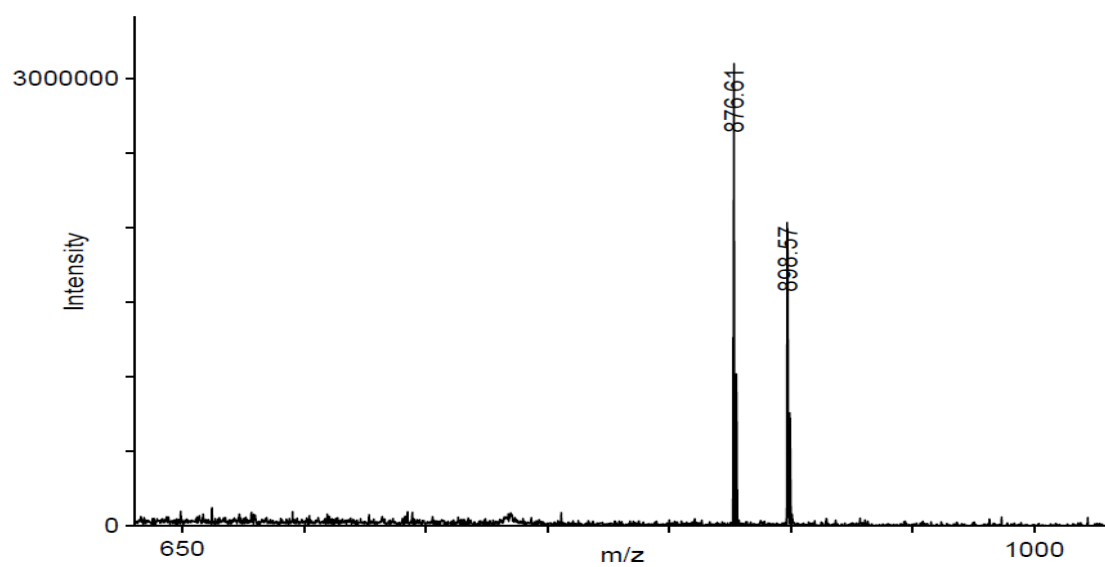

### 11 D-Phe-D-Phe

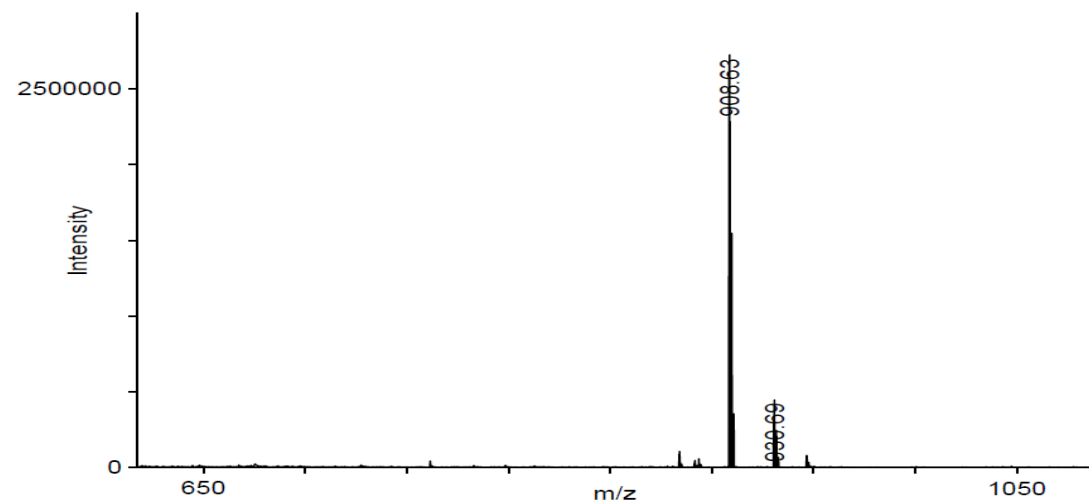

### 11 D-Phe-Nle

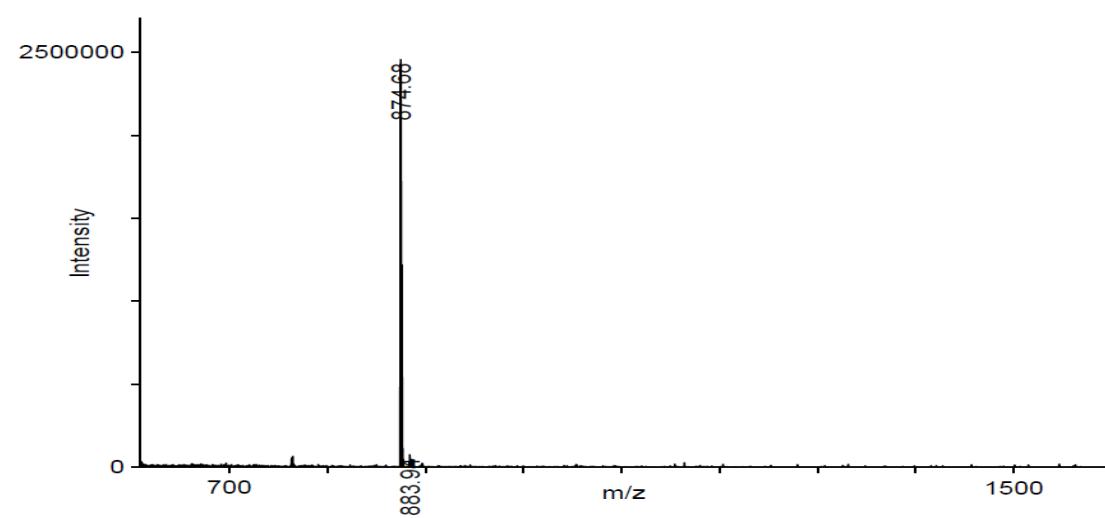

### 11 Nle-D-Thr

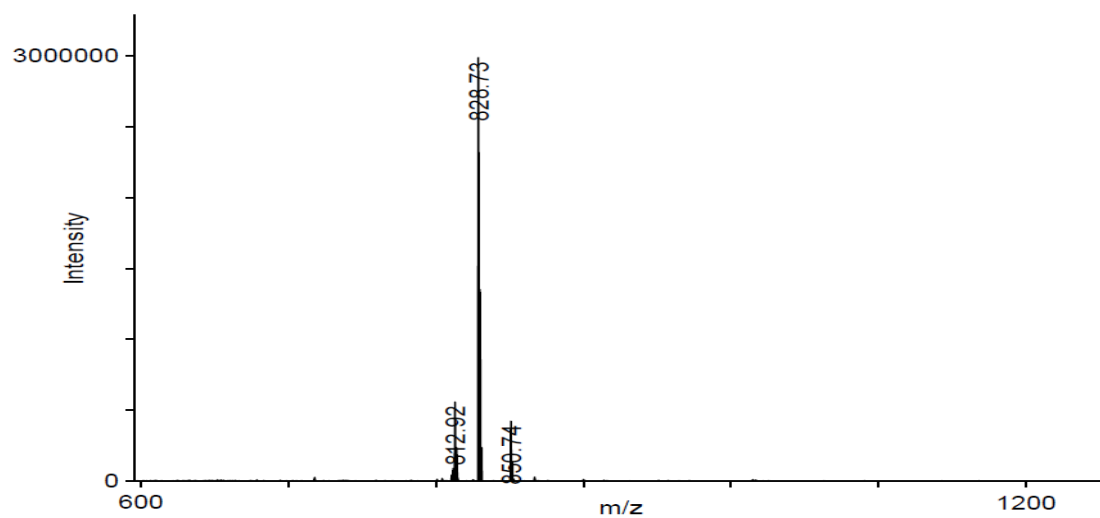

### 11 Nle-Gly

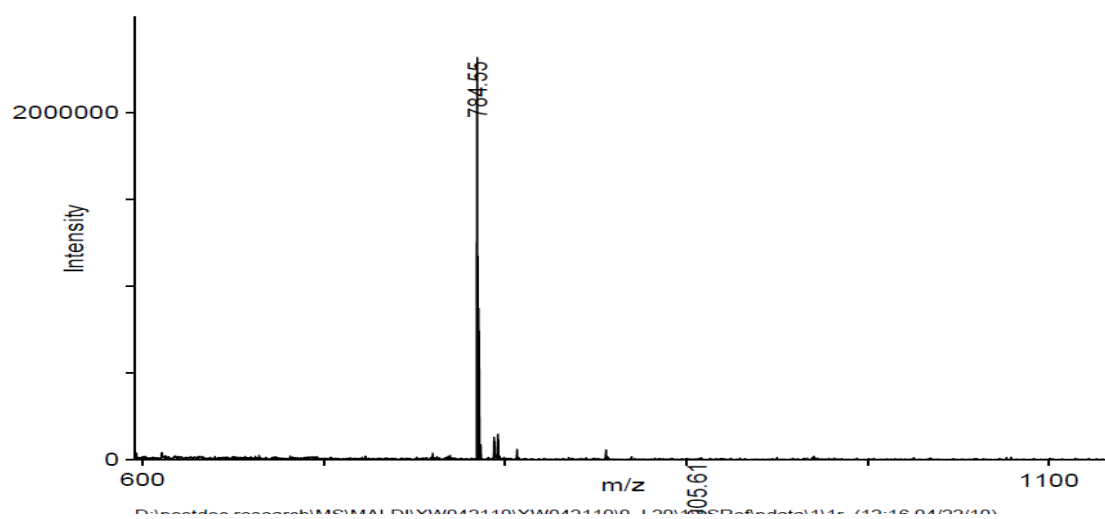

### 11 Nle-Ala

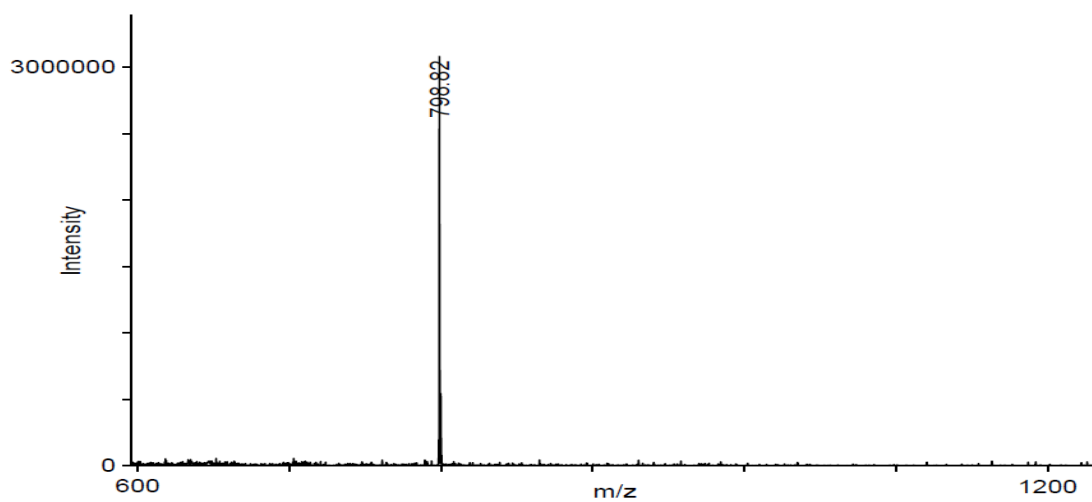

### 11 Nle-D-Val

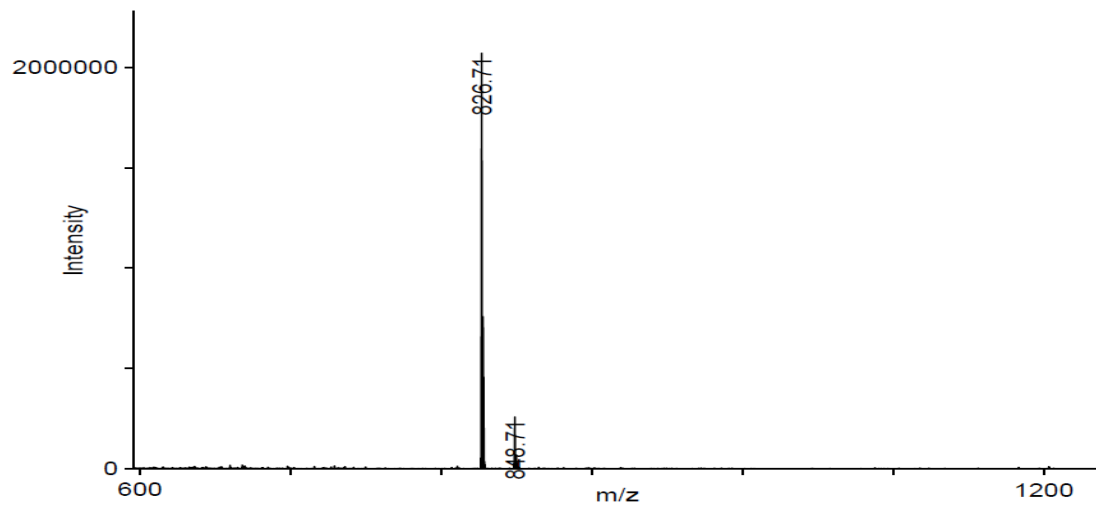

### 11 Nle-Pro

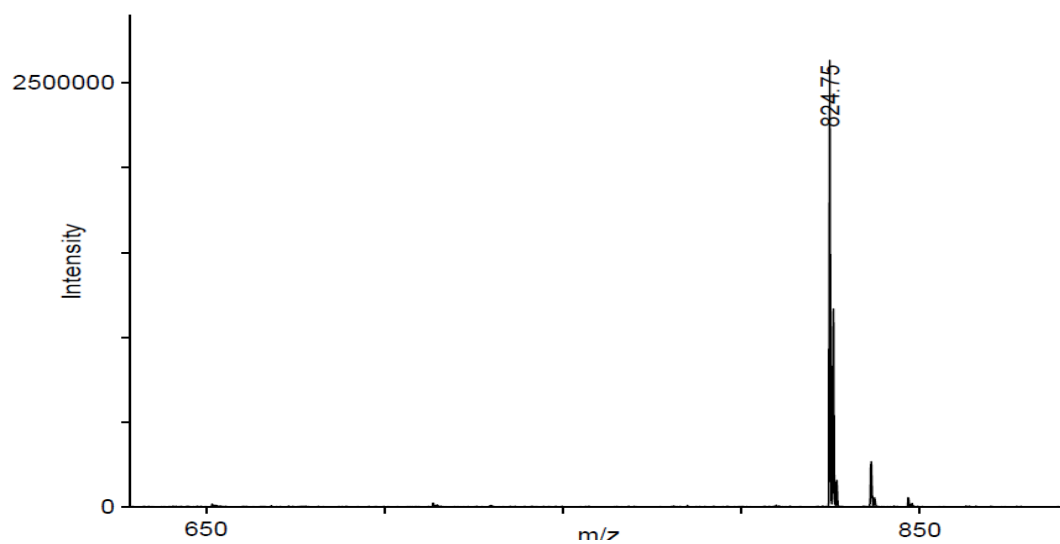

### 11 Nle-Lys

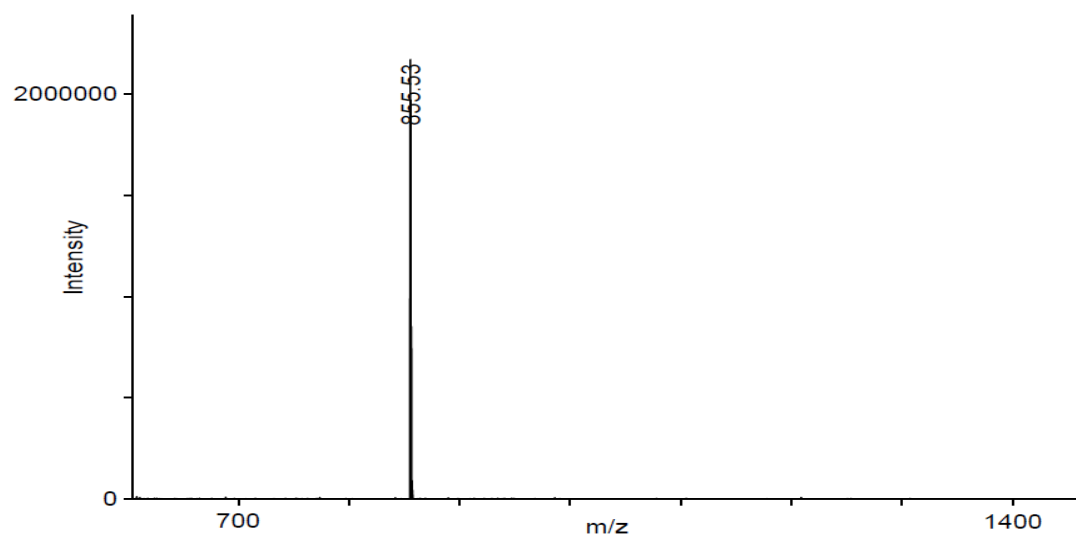

### 11 Nle-Trp

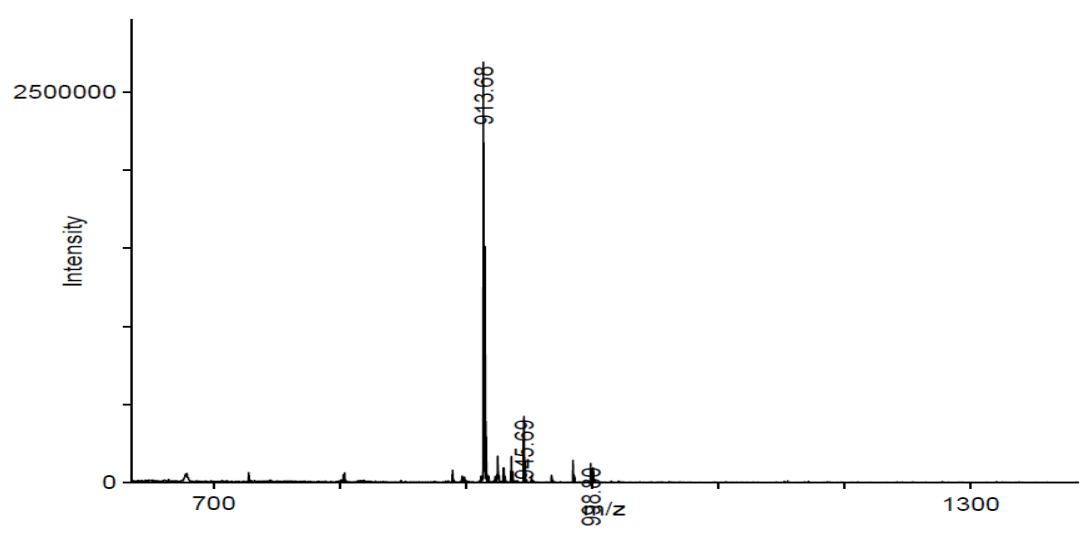

### 11 Nle-Asp

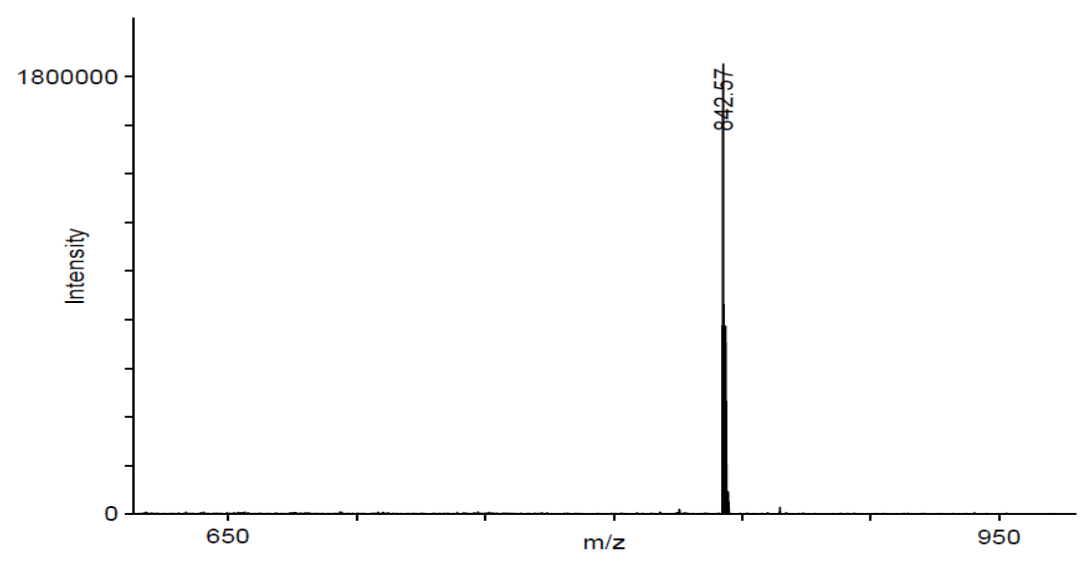

### 11 Nle-D-Phe

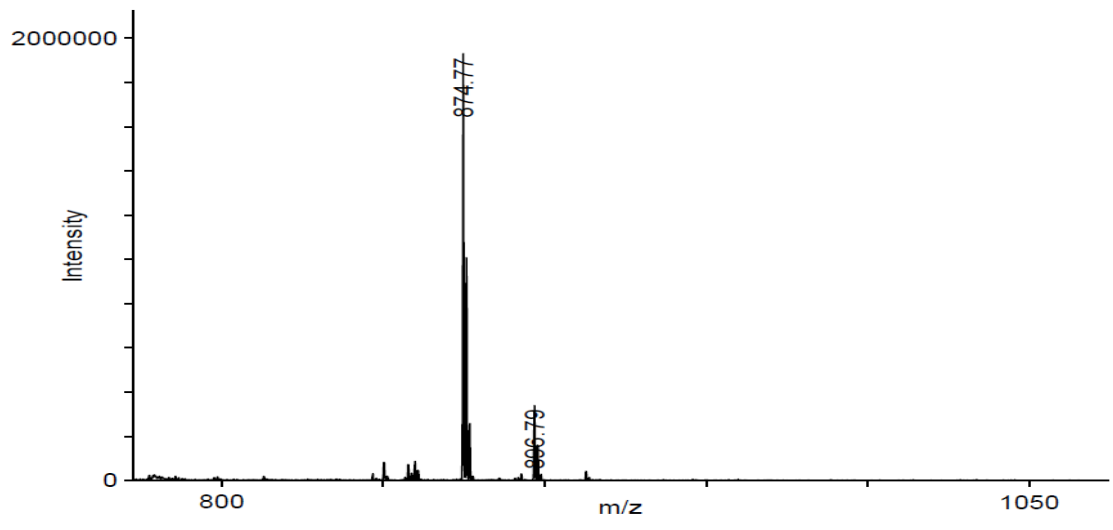

11 Nle-Nle

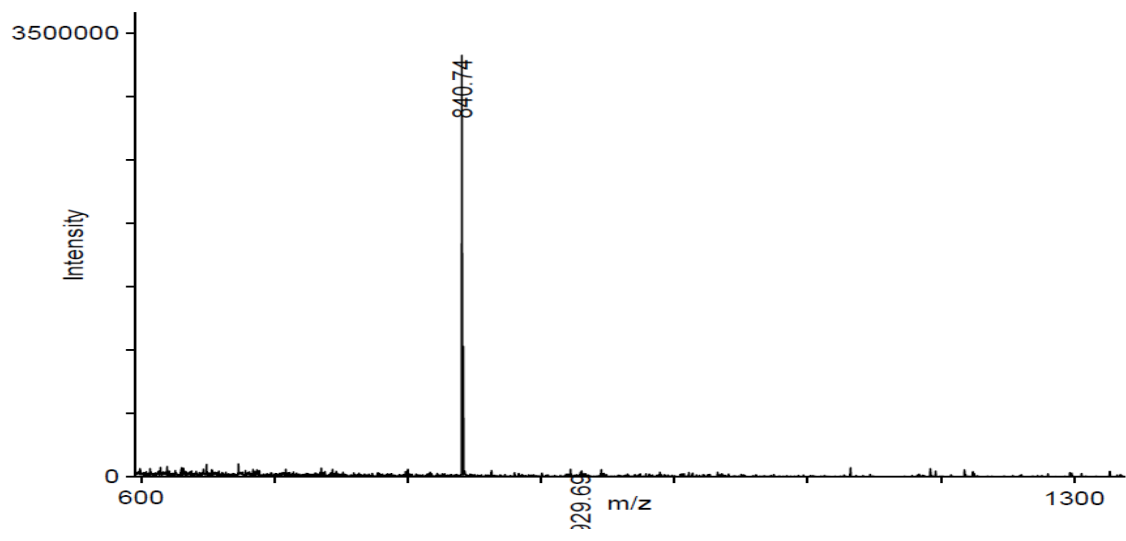

**Figure S4.** MALDI-TOF MS of Rapalogs **12** in Table 2

**12 D-Thr-D-Thr**

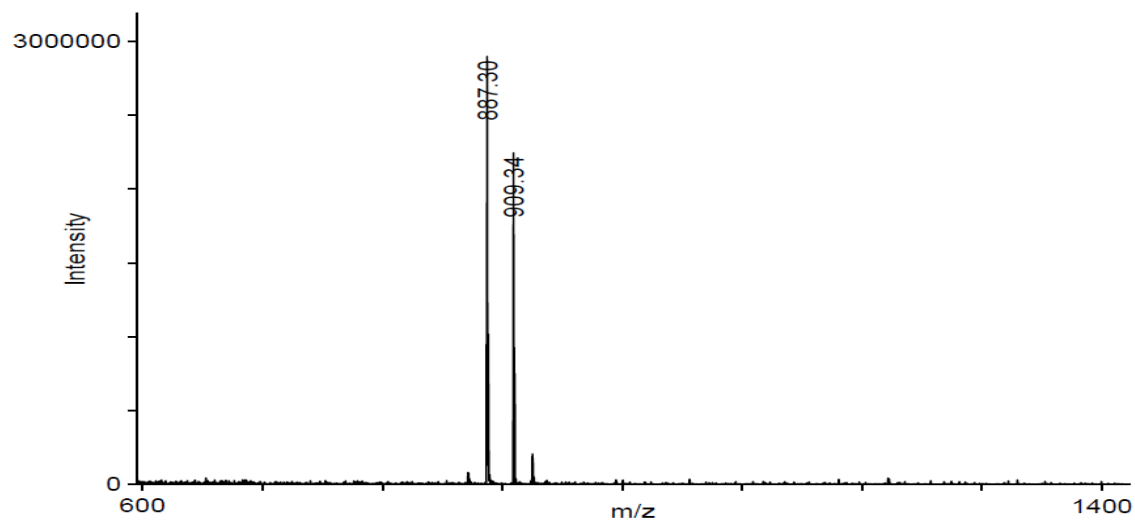

**12 D-Thr-Gly**

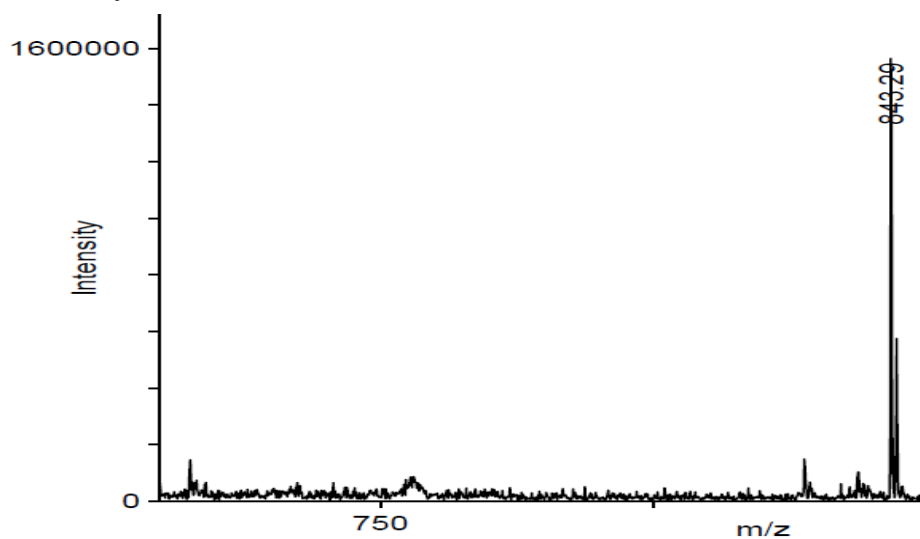

**12 D-Thr-Ala**

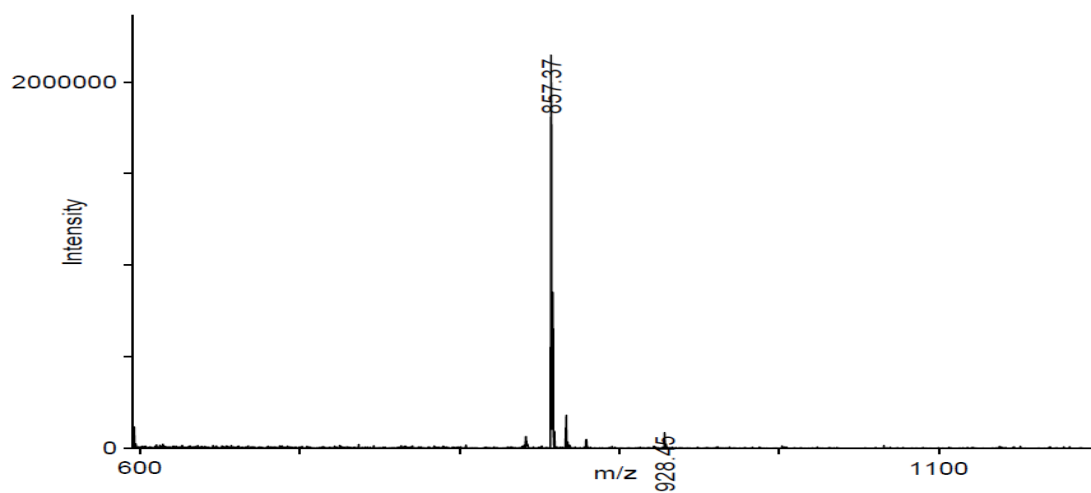

**12**  
**D-Thr-D-**  
**Val**

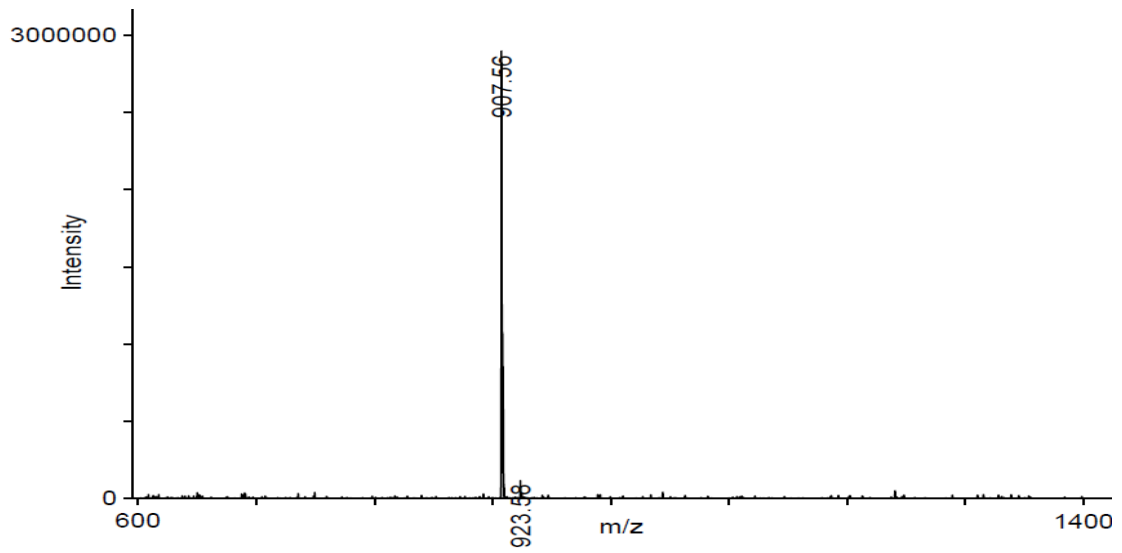

**12 D-Thr-Pro**

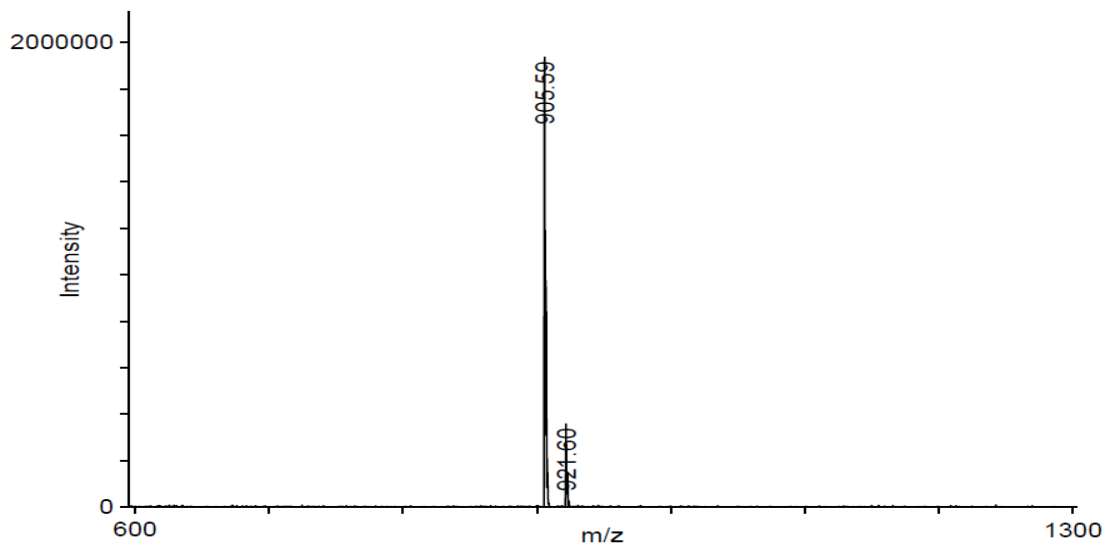

**12 D-Thr-Lys**

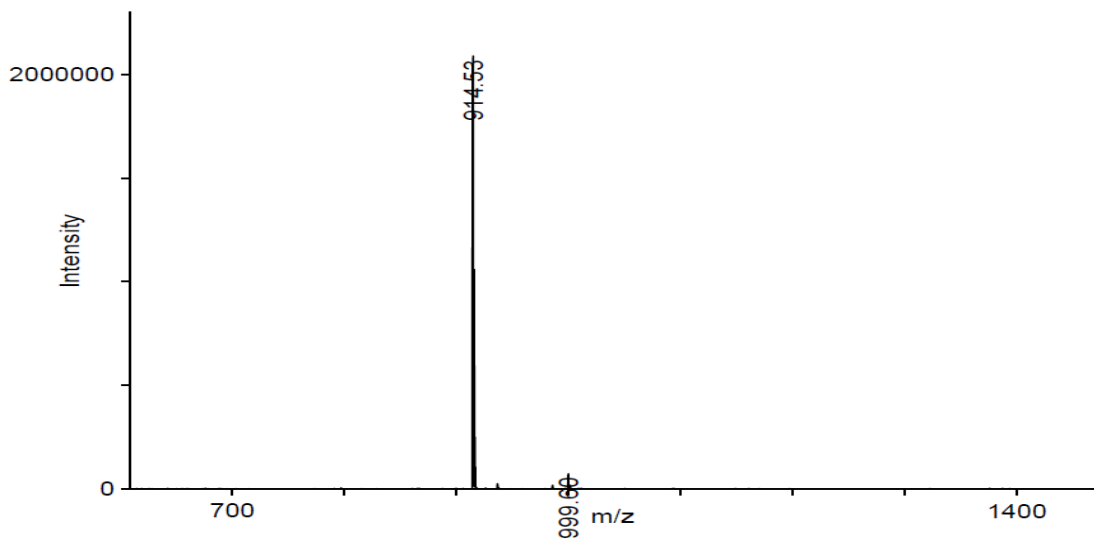

**12 D-Thr-Trp**

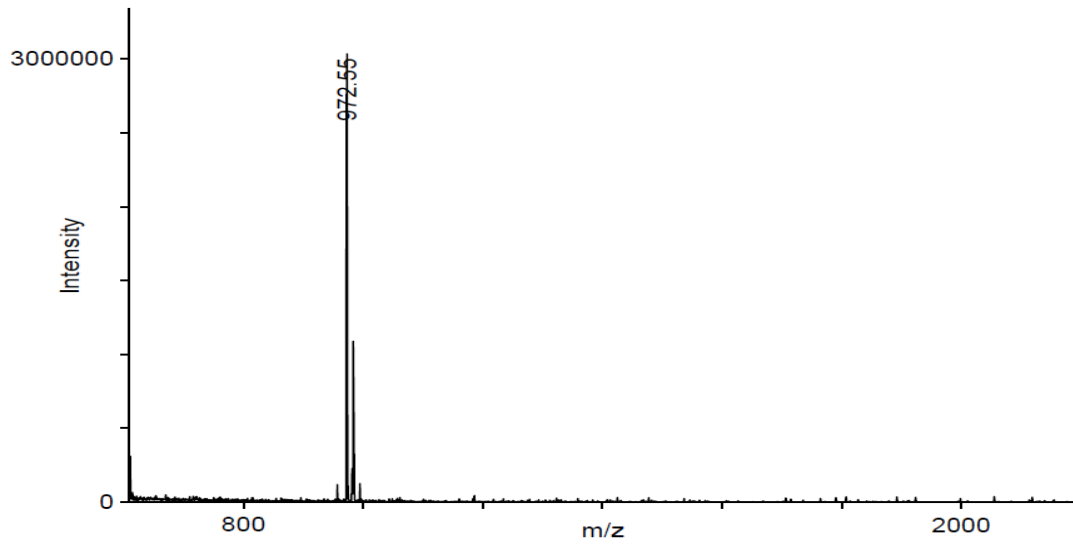

**12 D-Thr-Asp**

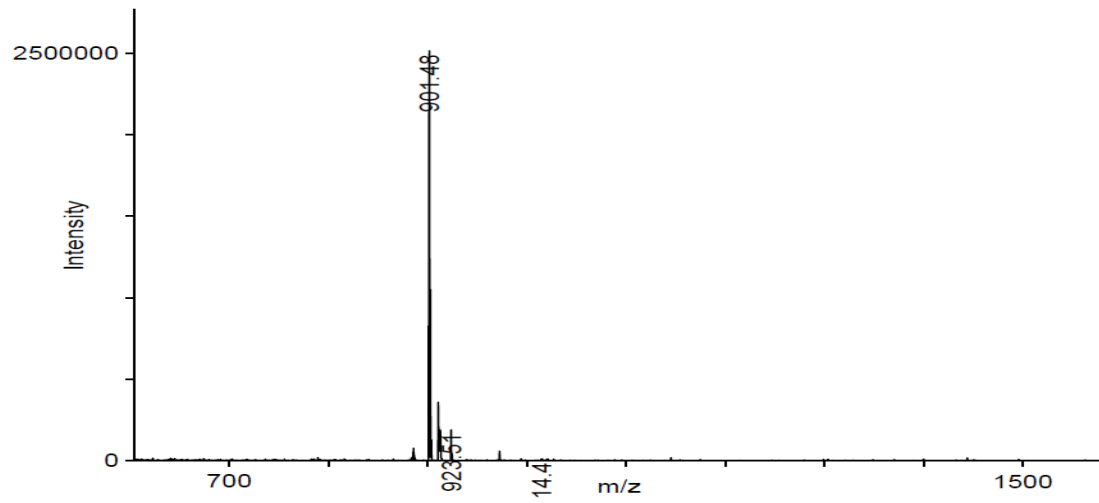

**12 D-Thr-D-Phe**

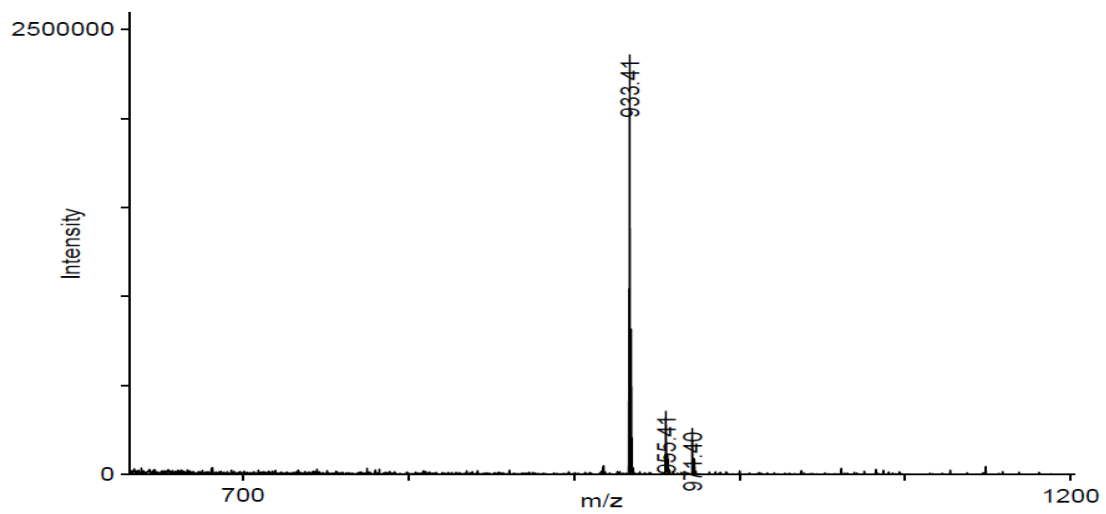



### 12 D-Thr-Nle

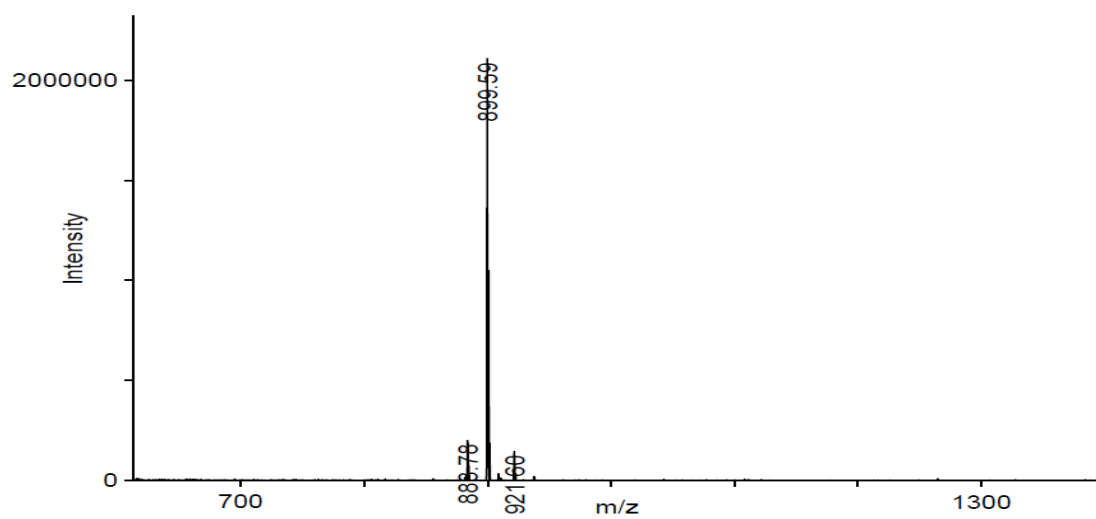

### 12 Gly-D-Thr

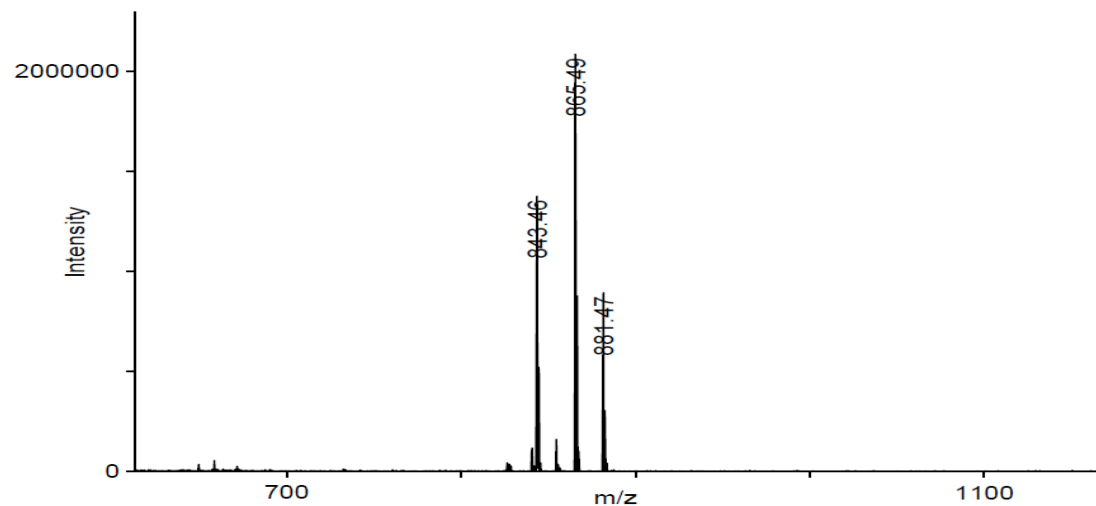

843(MW+H<sup>+</sup>); 865(MW+Na<sup>+</sup>), 881(MW+K<sup>+</sup>)

### 12 Gly-Gly

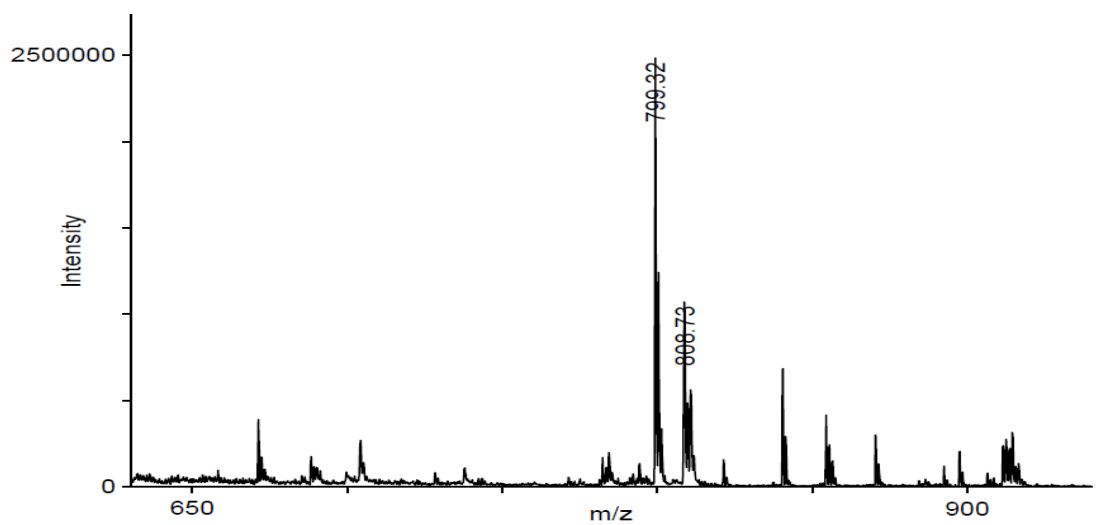

### 12 Gly-Ala (12b)

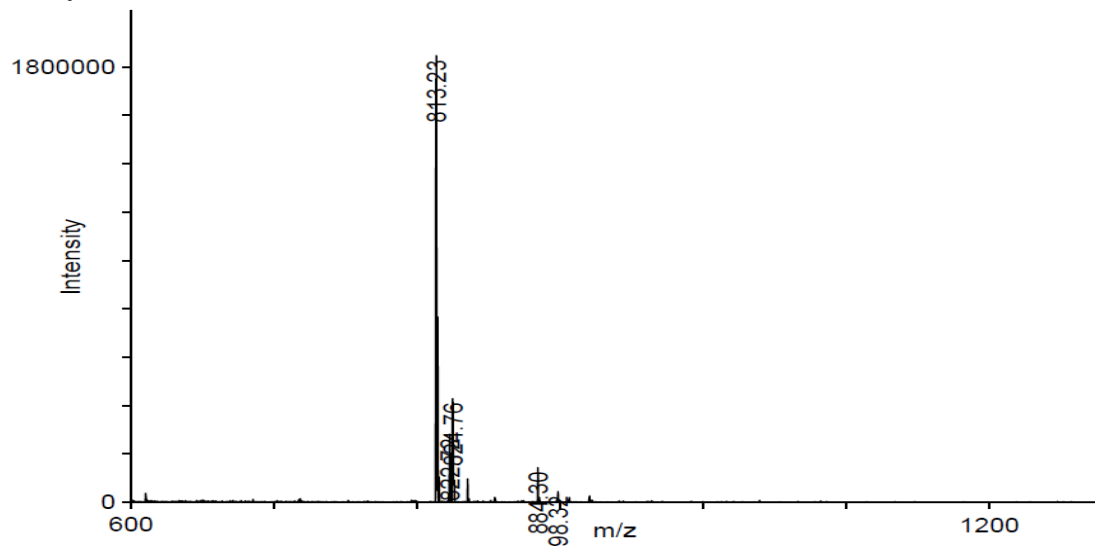

### 12 Gly-D-Val

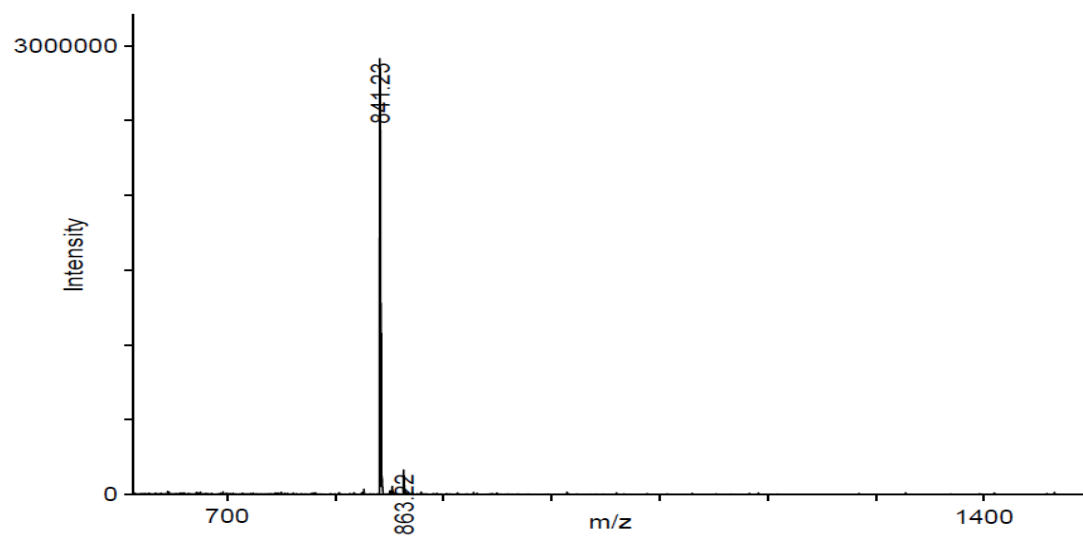

### 12 Gly-Pro

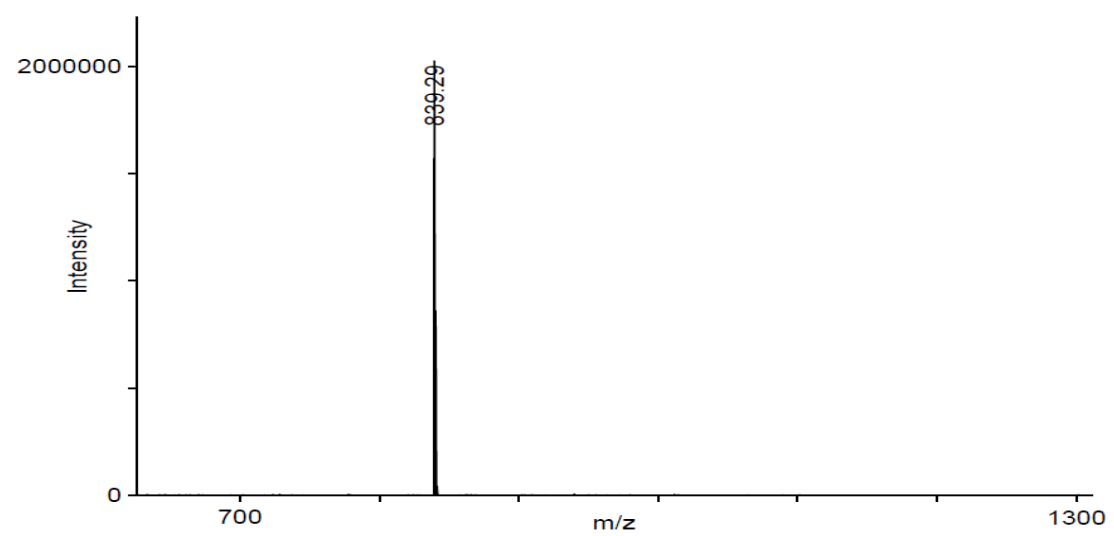

### 12 Gly-Lys

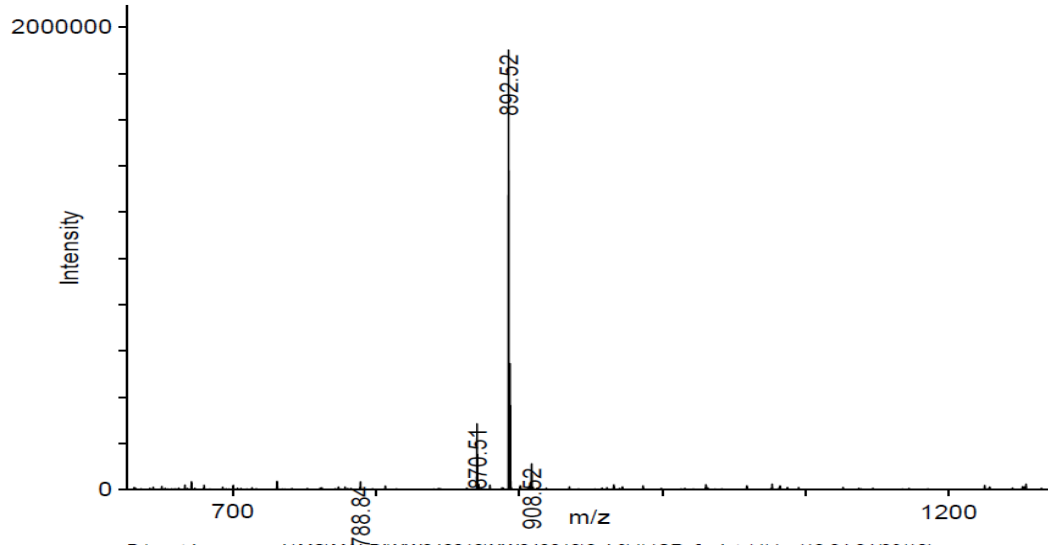

### 12 Gly-Trp

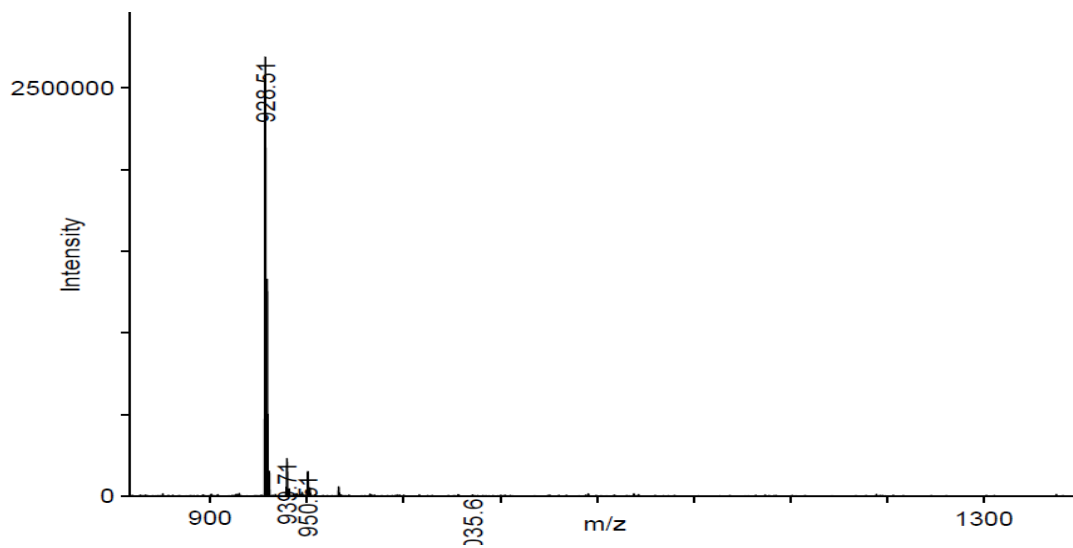

### 12 Gly-Asp

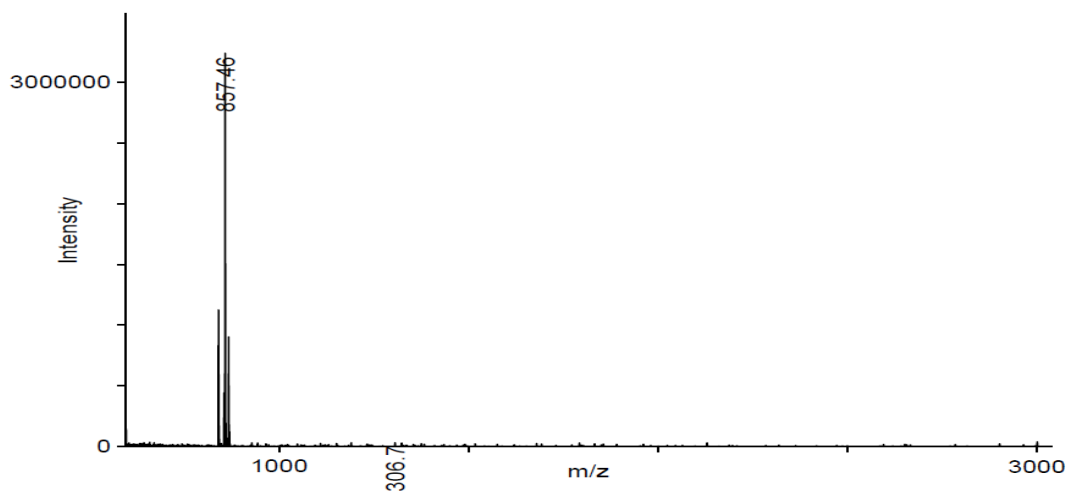

### 12 Gly-D-Phe

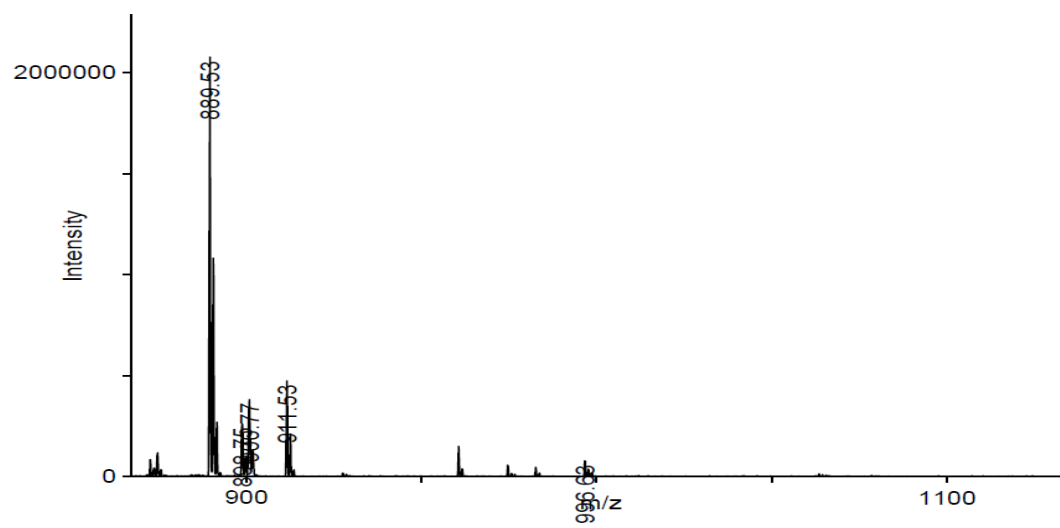

### 12 Gly-Nle

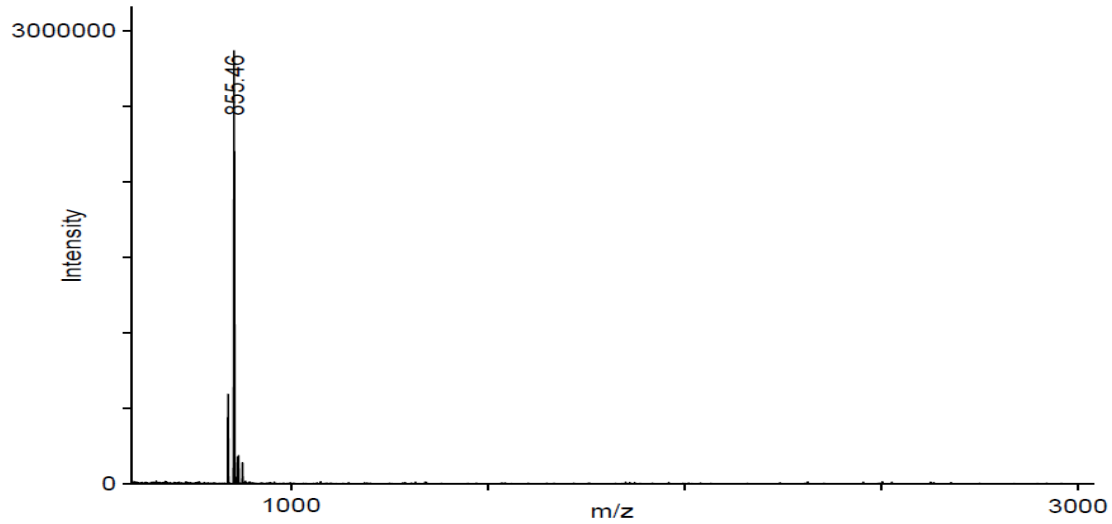

### 12 Ala-D-Thr

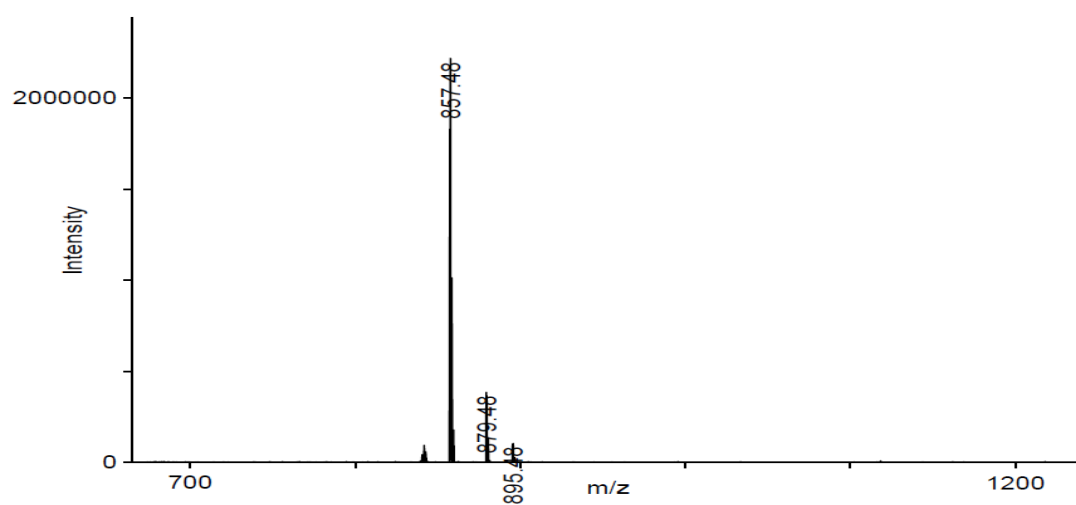

**12 Ala-Ala**

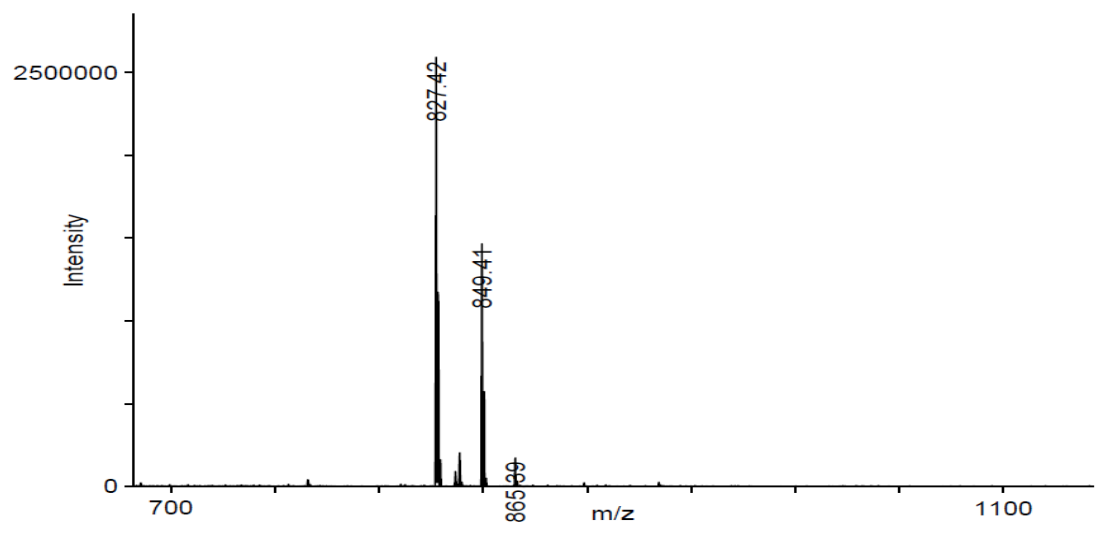

**12 Ala-D-Val**

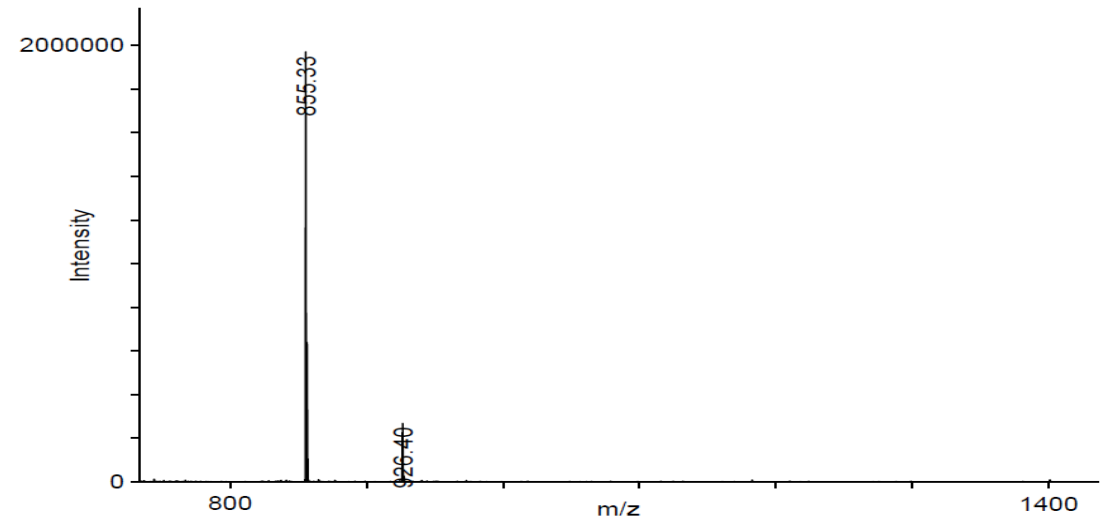

**12 Ala-Pro**

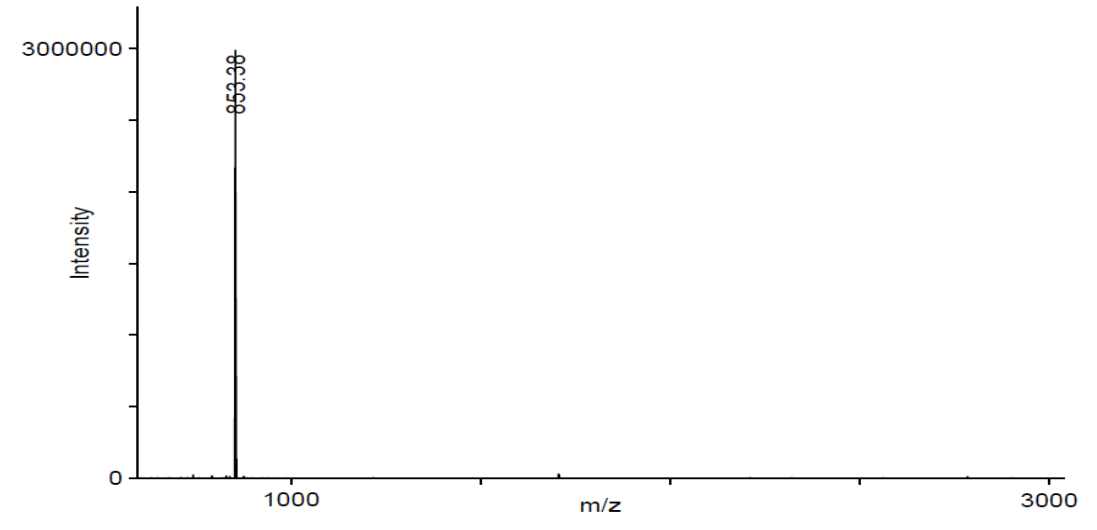

### 12 Ala-Lys

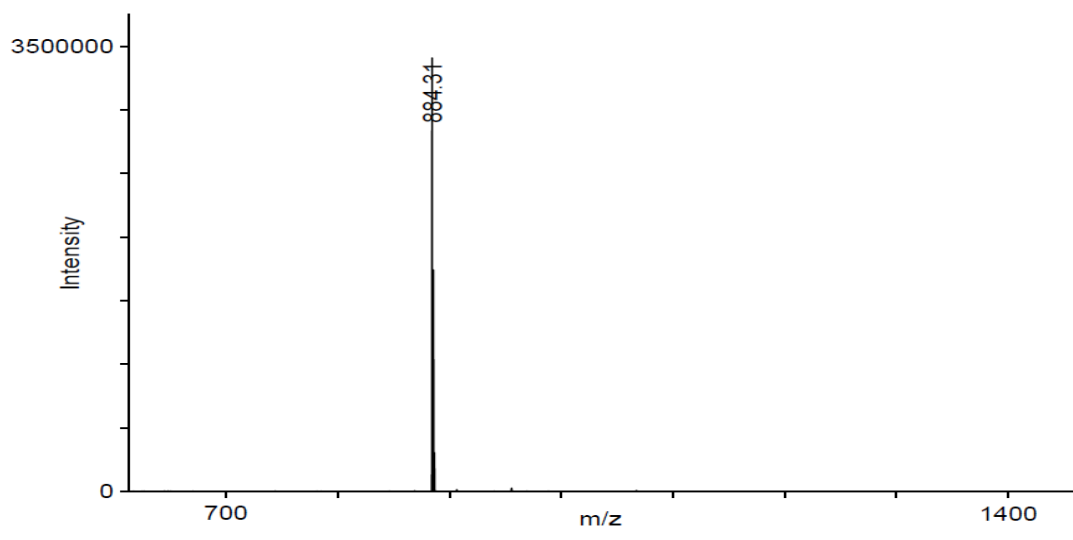

### 12 Ala-Trp

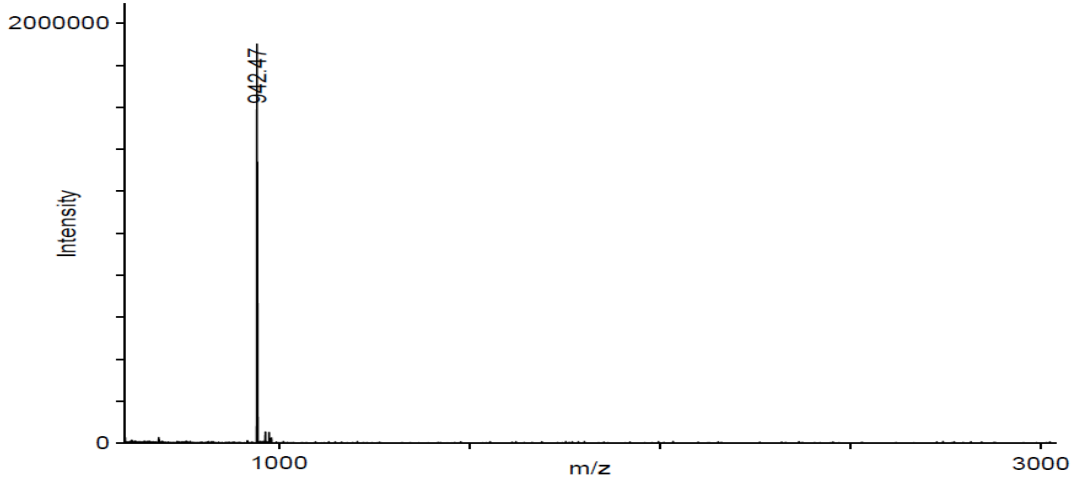

### 12 Ala-Asp

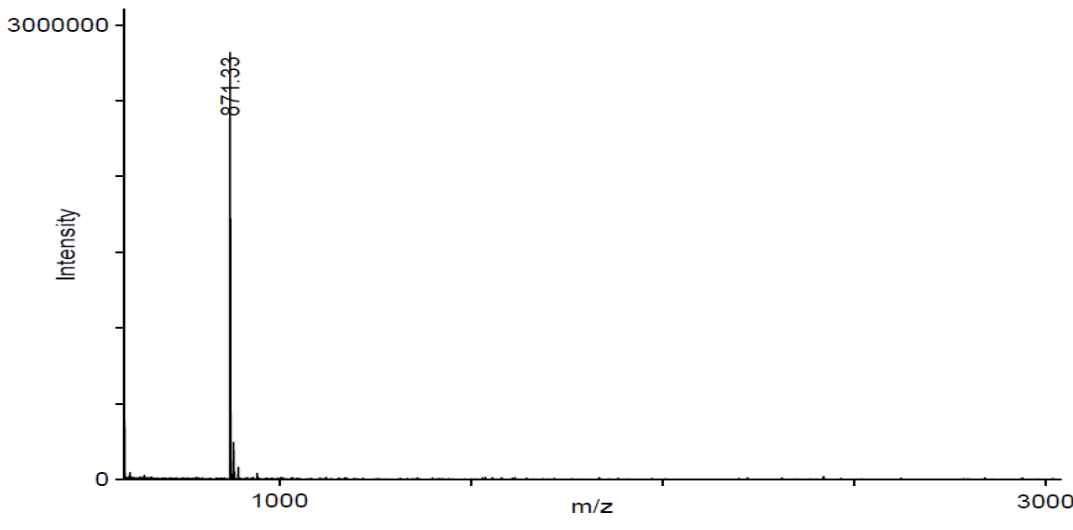

### 12 Ala-D-Phe

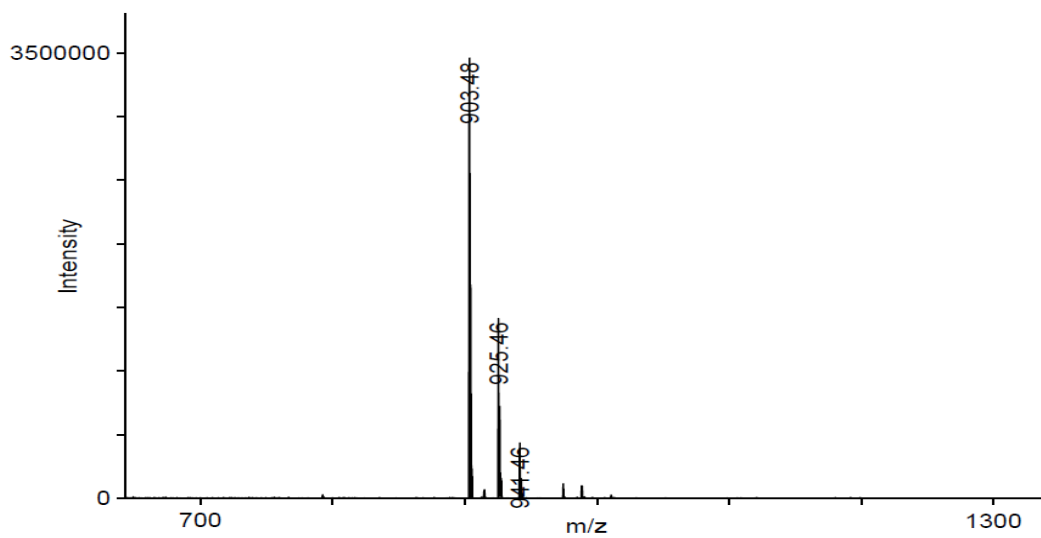

### 12 Ala-Nle

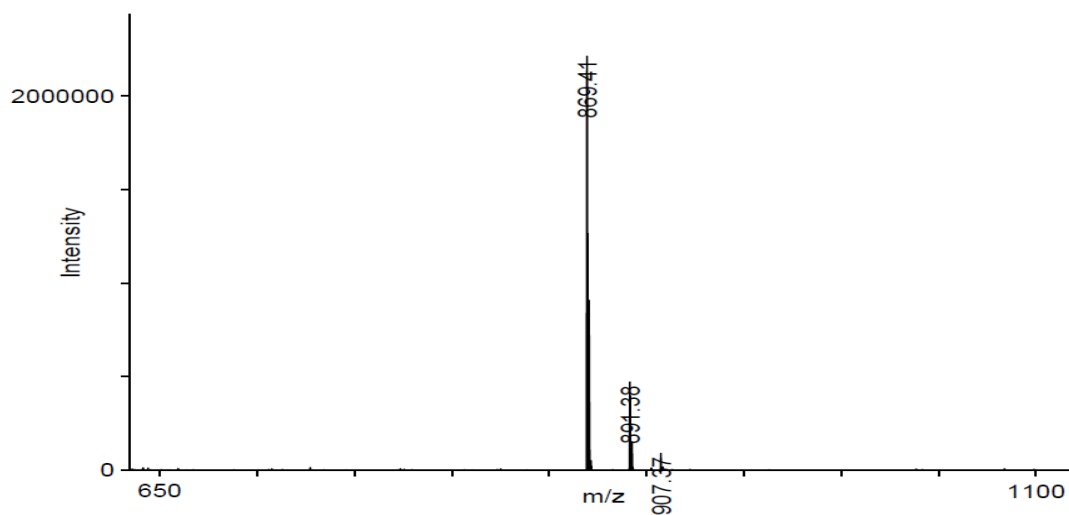

### 12 D-Val-D-Thr

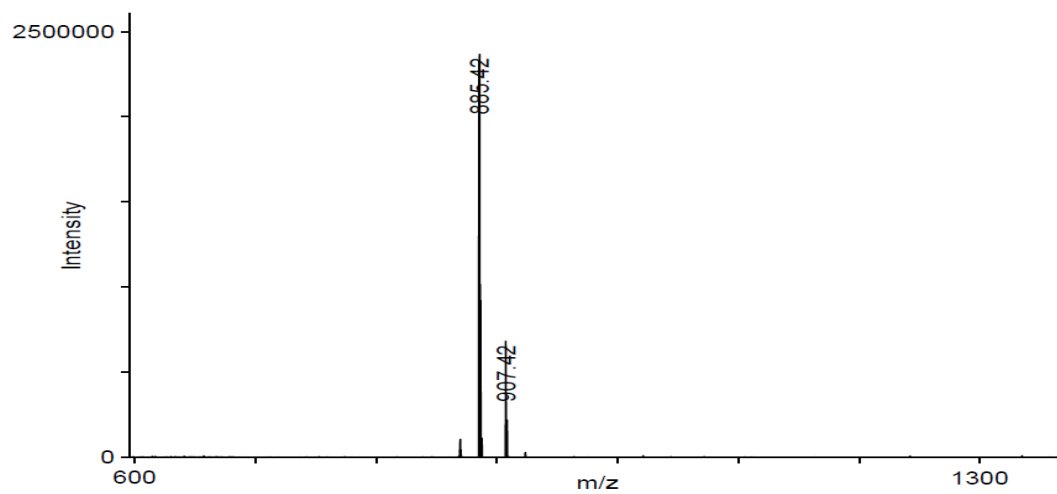

**12 D-Val-Gly (12c)**

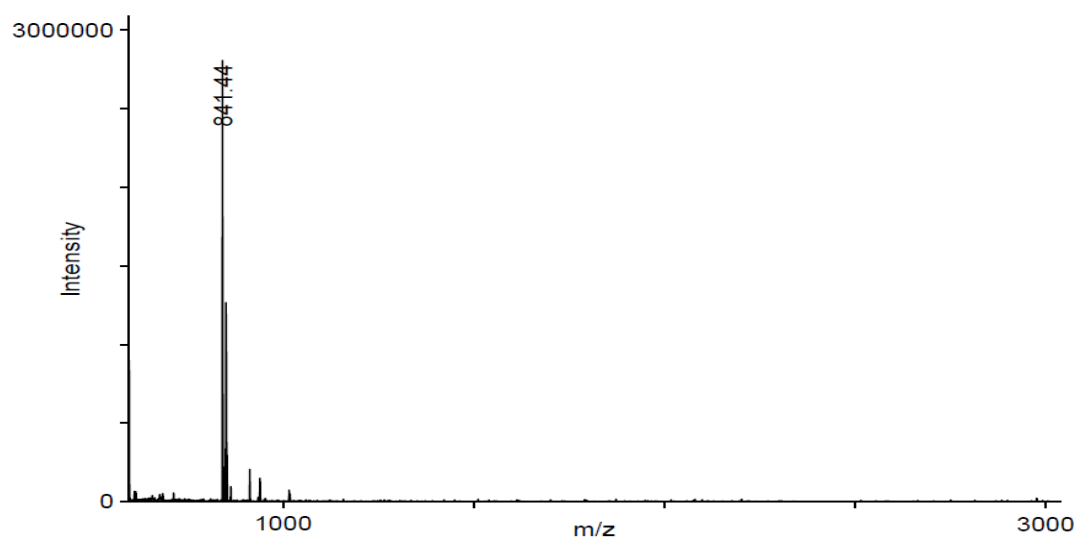

**12 D-Val-Ala**

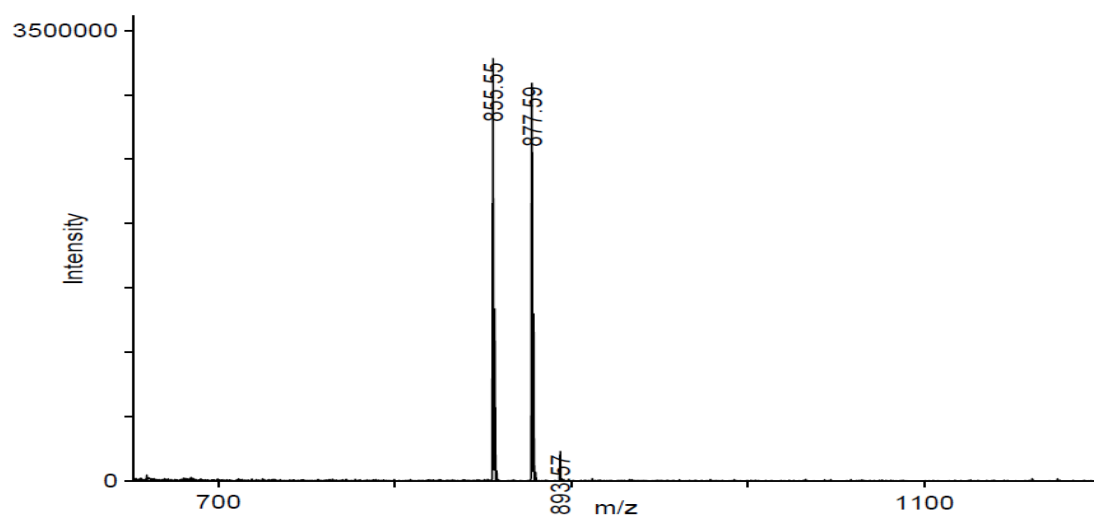

**12 D-Val-D-Val**

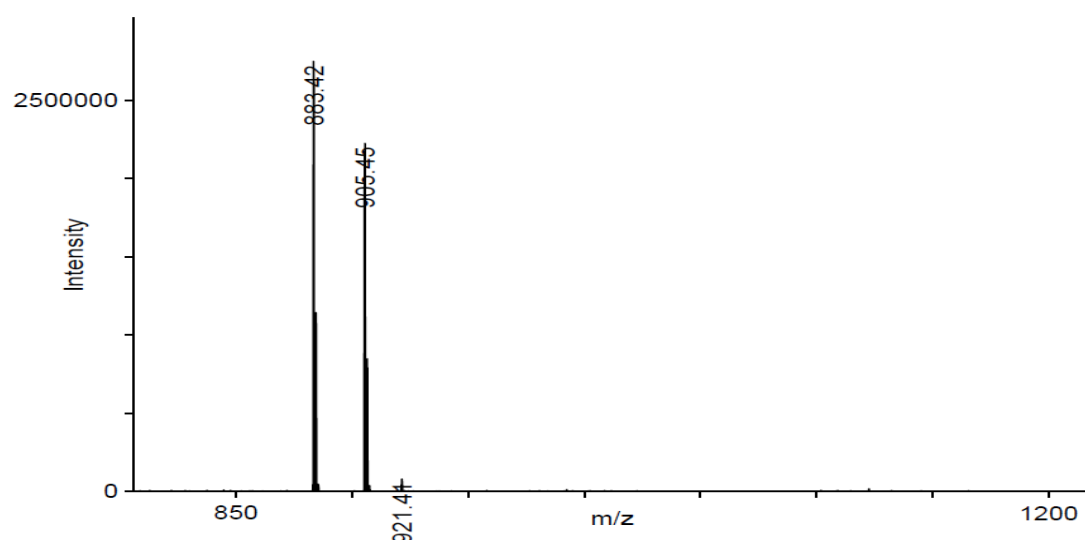



### 12 D-Val-Pro

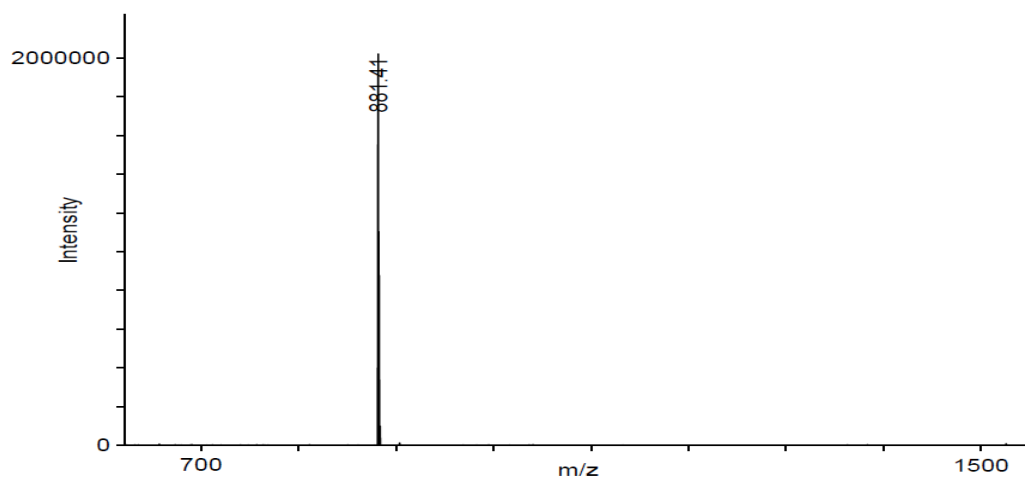

### 12 D-Val-Lys

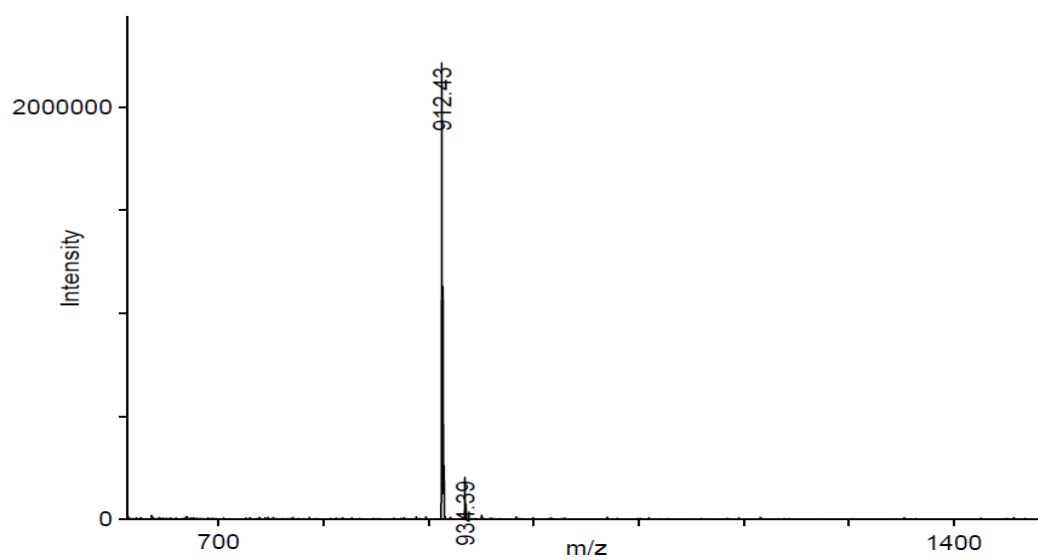

### 12 D-Val-Trp

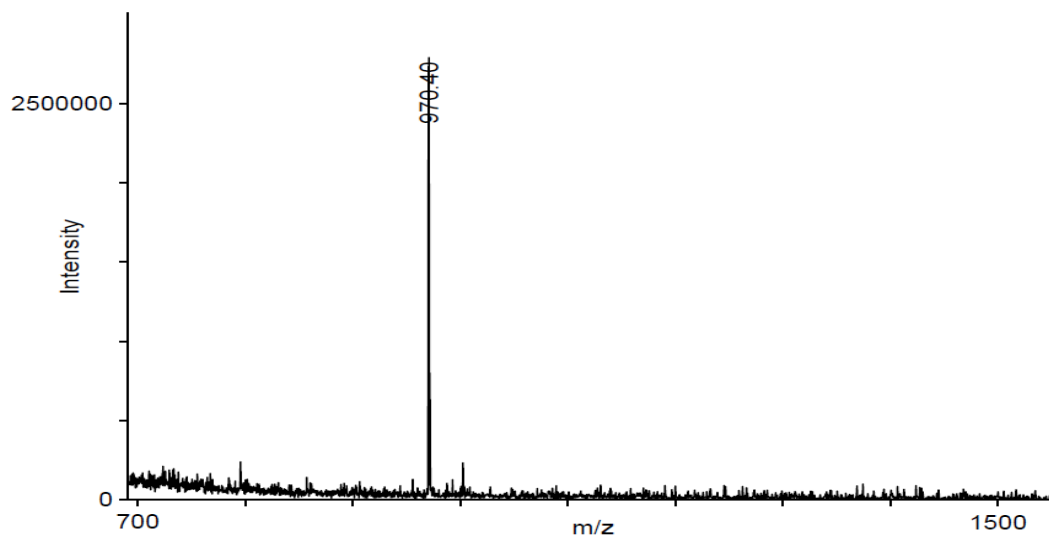

### 12 D-Val-Asp

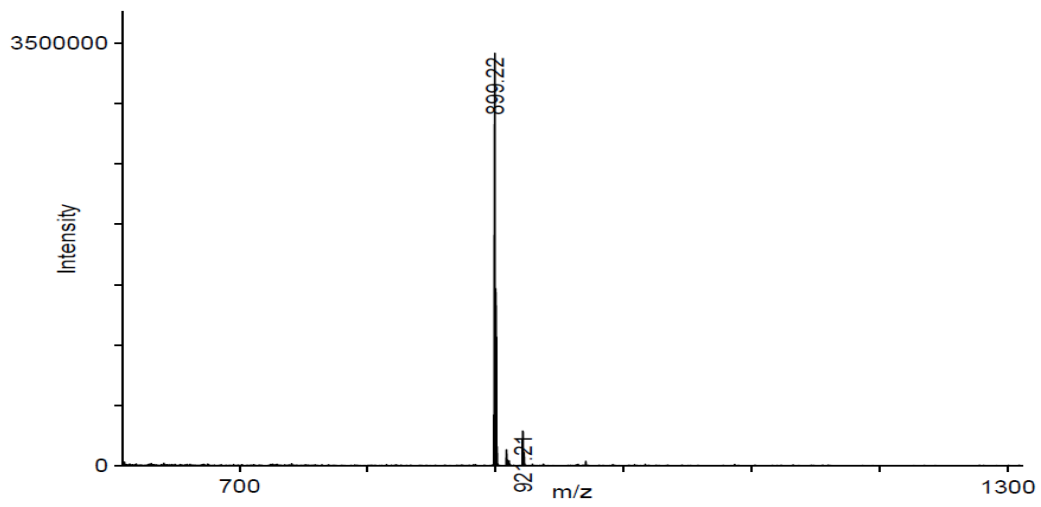

### 12 D-Val-D-Phe

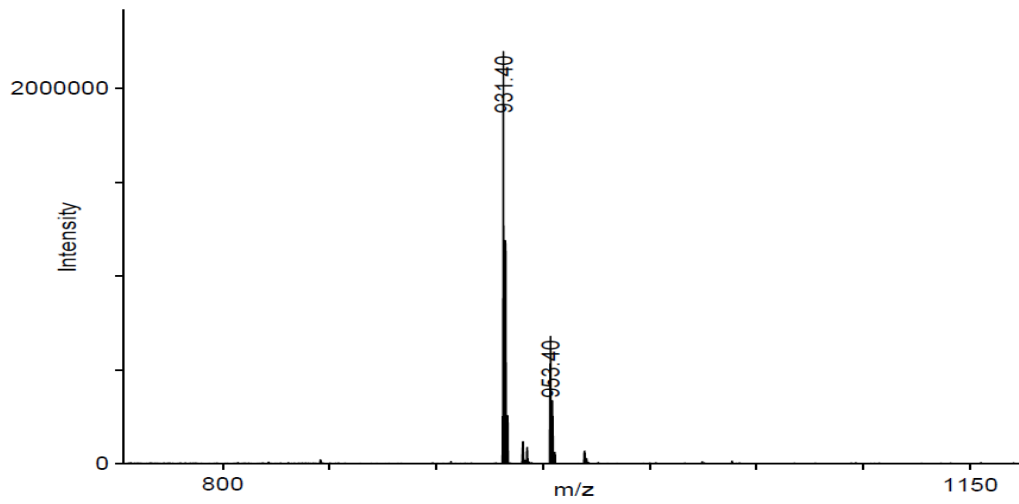

### 12 D-Val-Nle

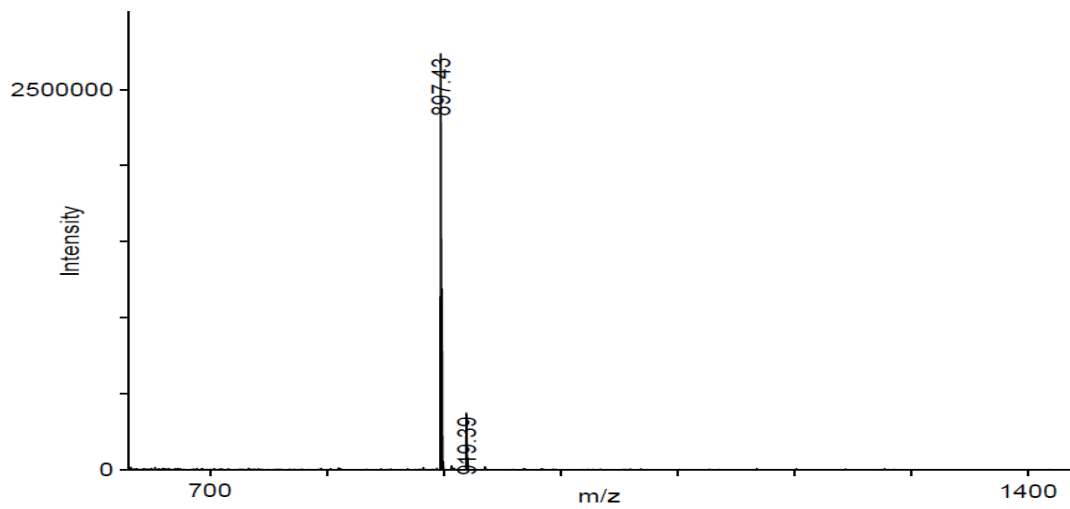

### 12 Pro-D-Thr

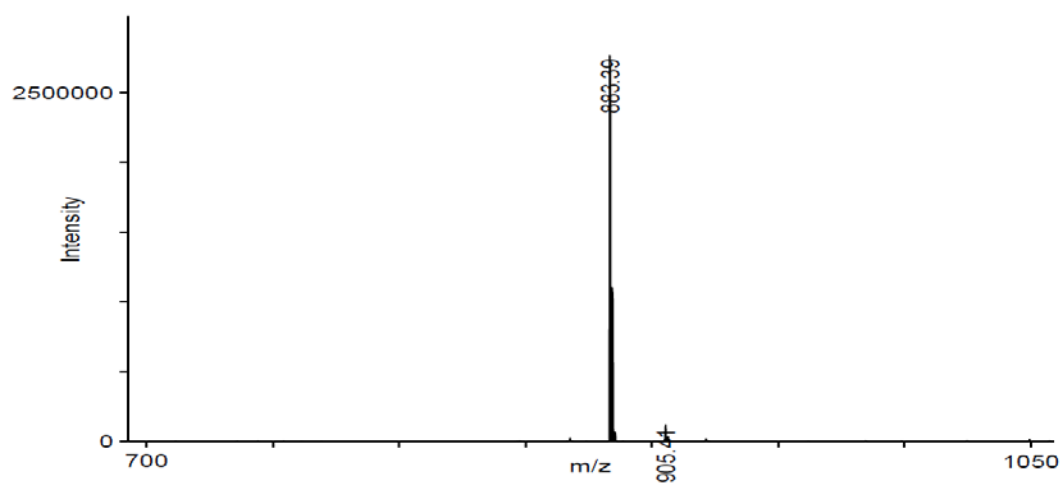

### 12 Pro-Gly

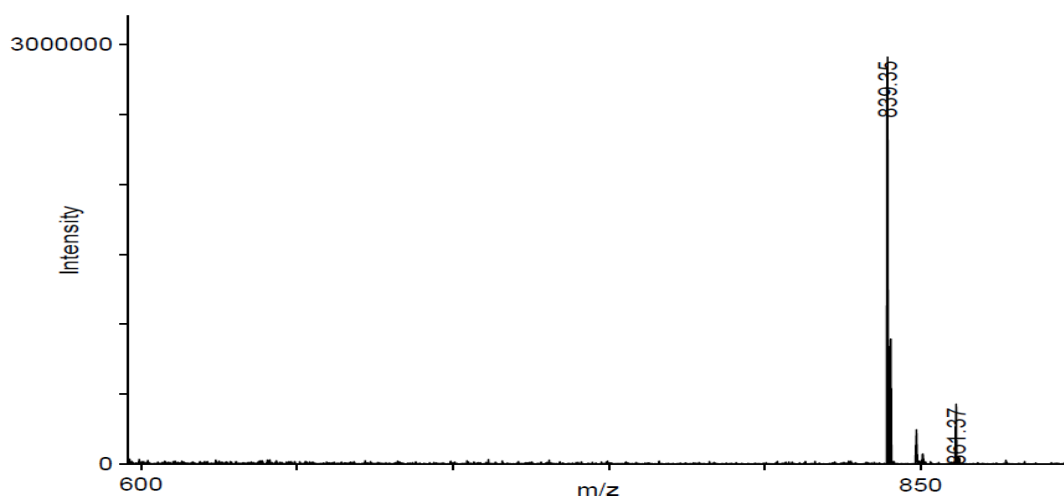

### 12 Pro-Ala

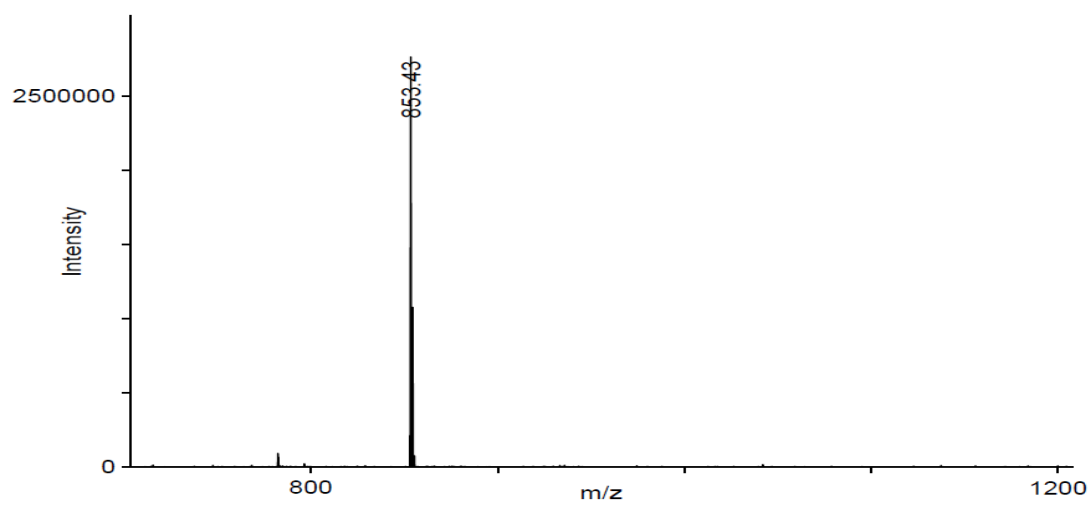

### 12 Pro-D-Val

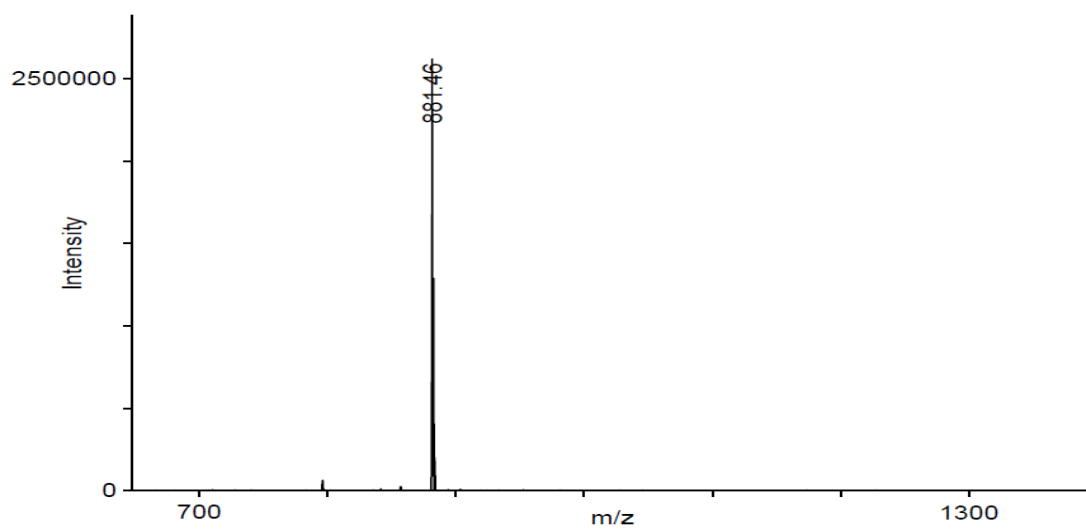

### 12 Pro-Pro

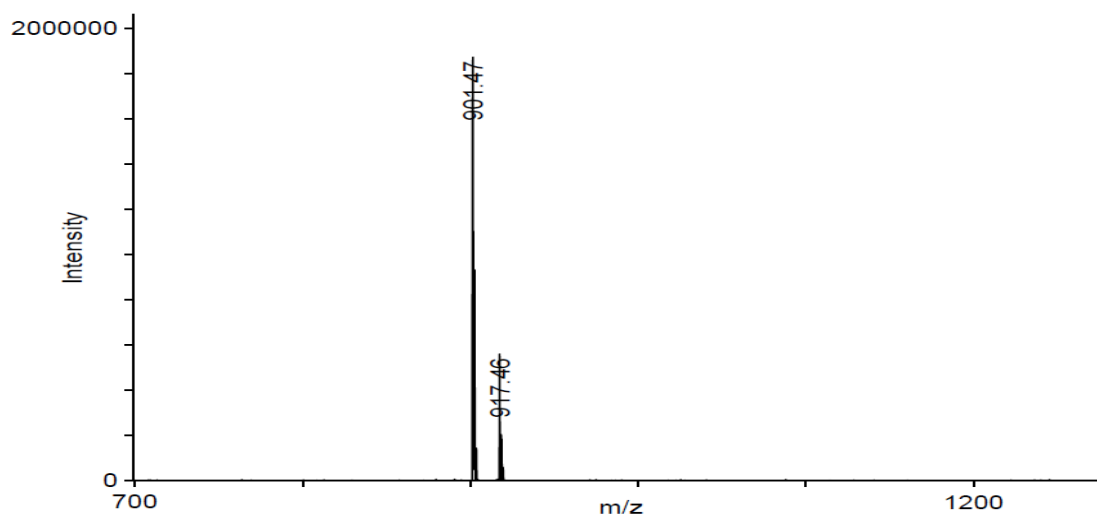

### 12 Pro-Lys

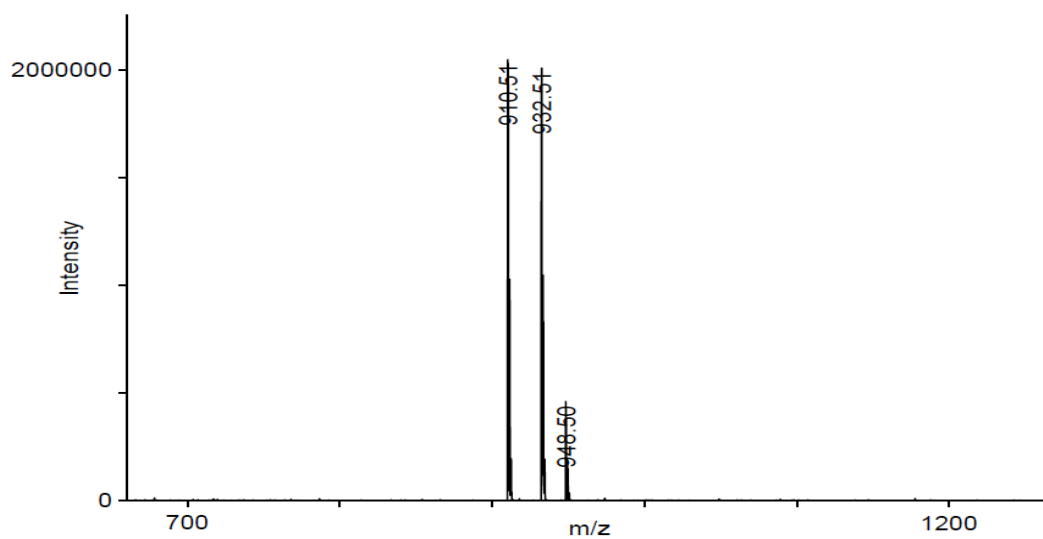

### 12 Pro-Asp

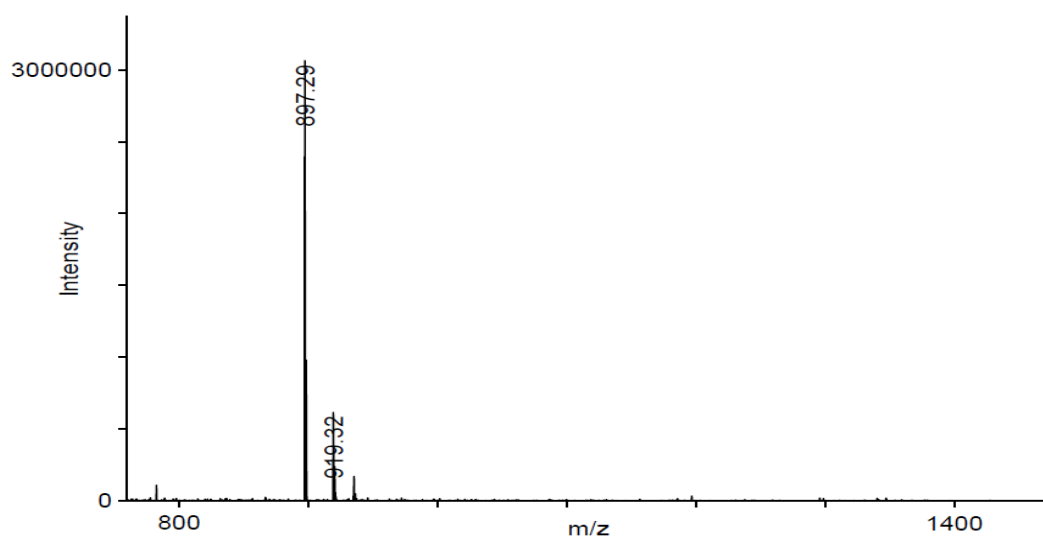

### 12 Pro-D-Phe

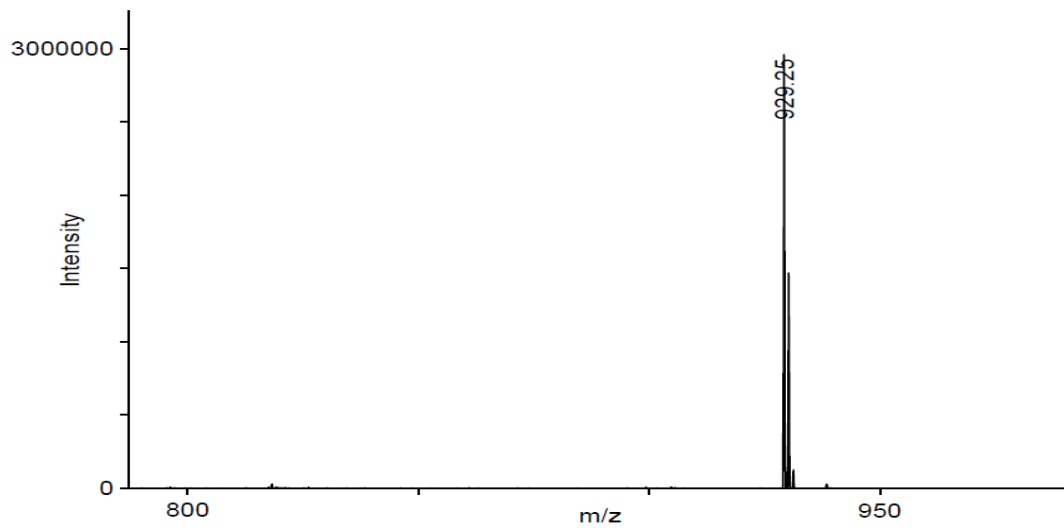

### 12 Pro-Nle

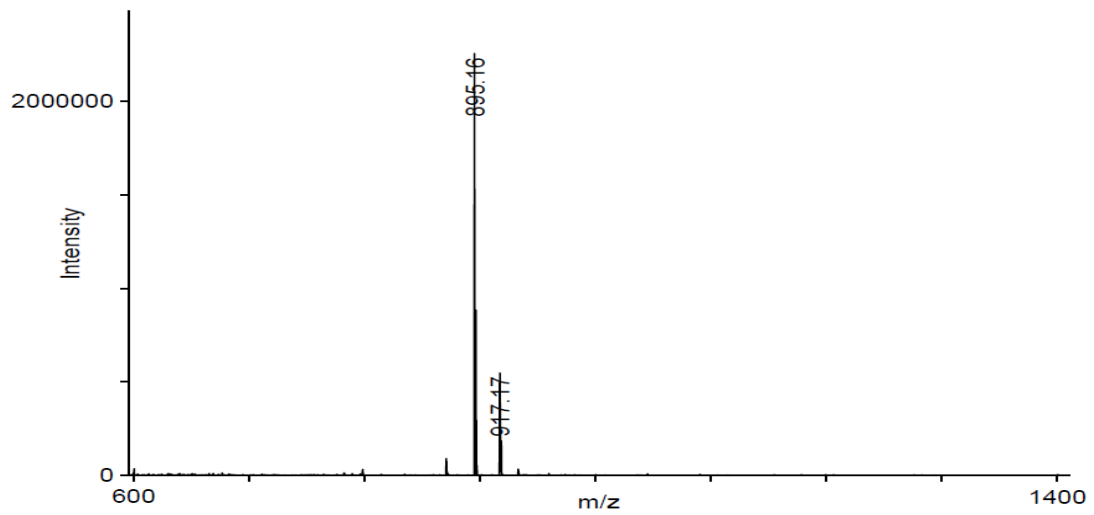

### 12 Lys-D-Thr

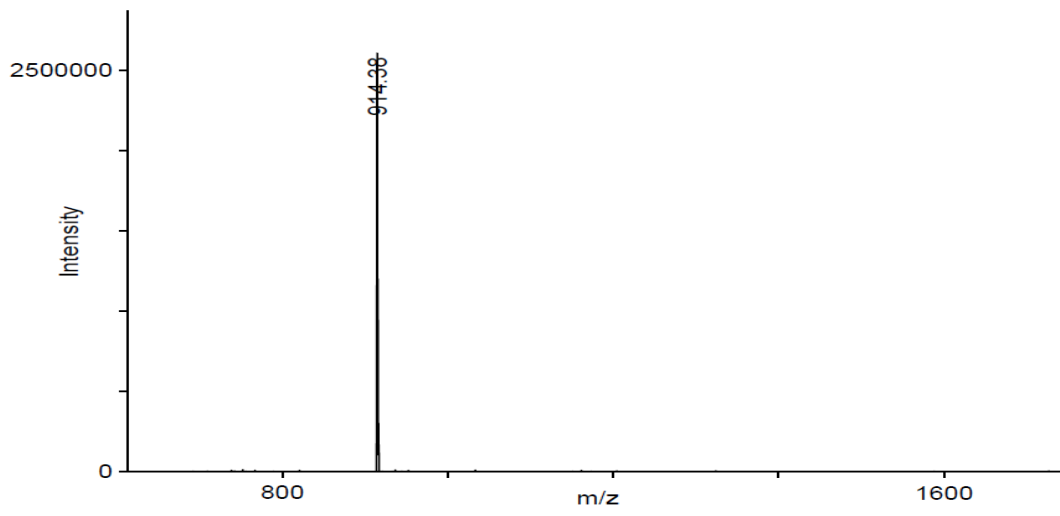

### 12 Lys-Gly

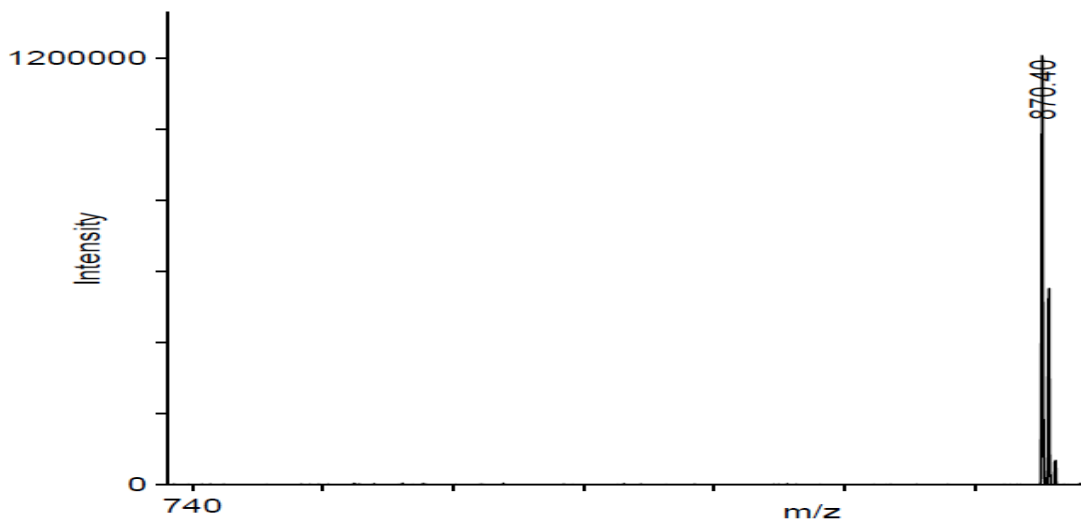

### 12 Lys-Ala

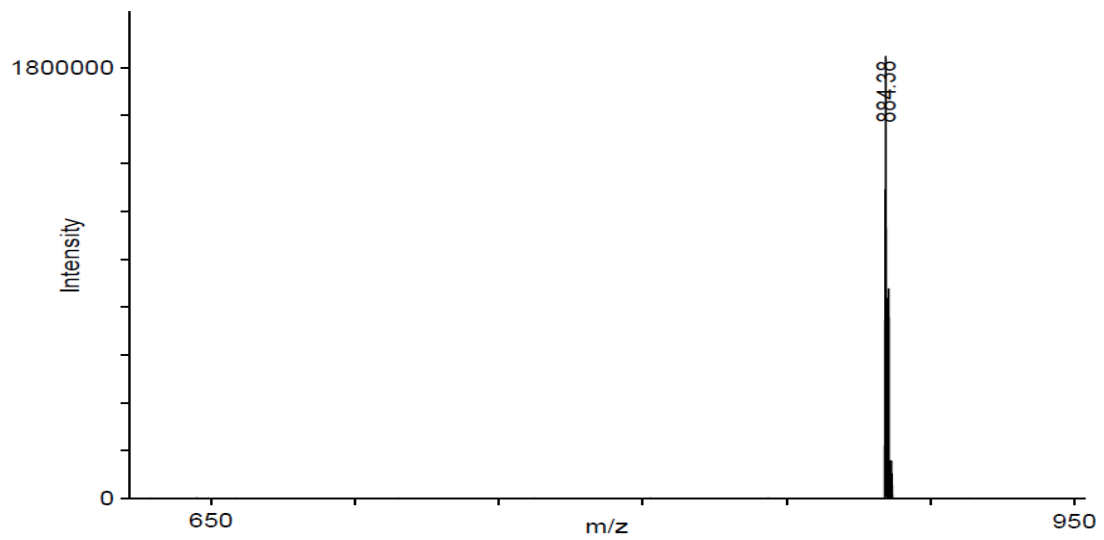

### 12 Lys-D-Val

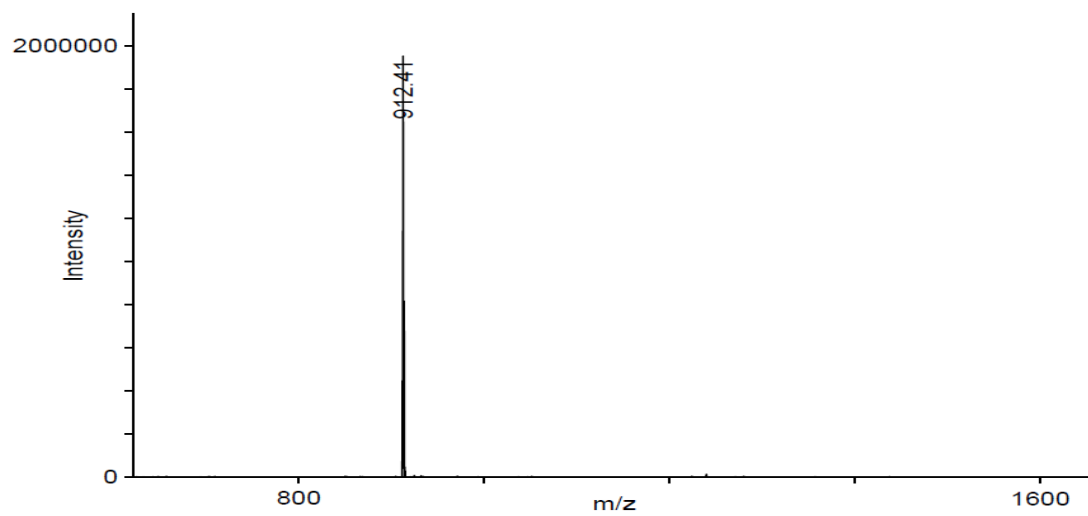

### 12 Lys-Pro

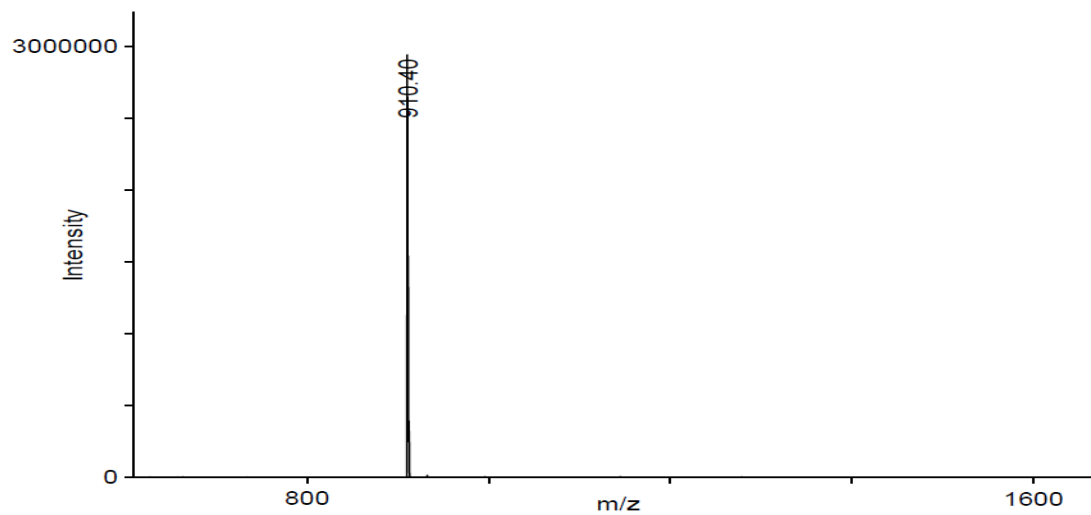

### 12 Lys-Lys

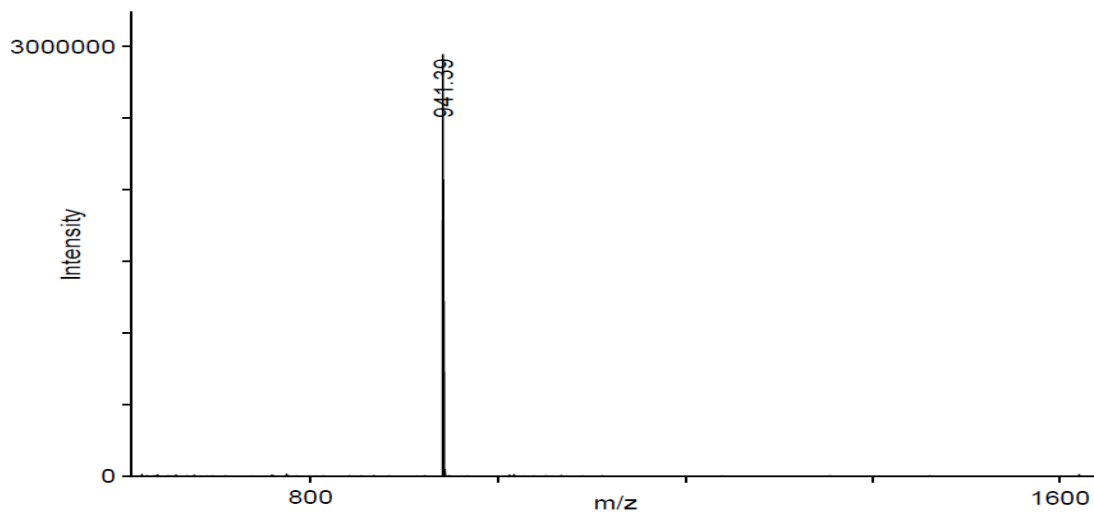

### 12 Lys-Trp

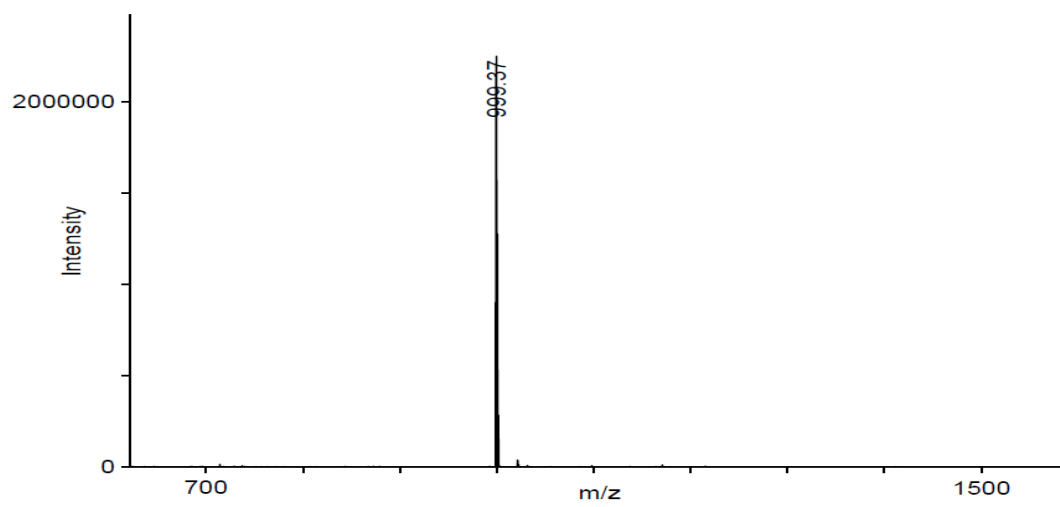

### 12 Lys-Asp

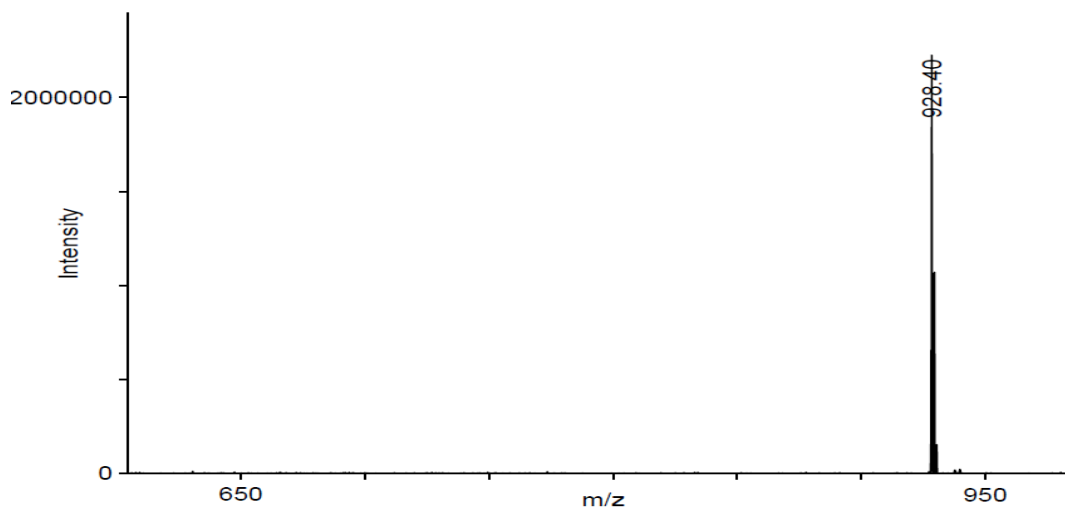

### 12 Lys-D-Phe

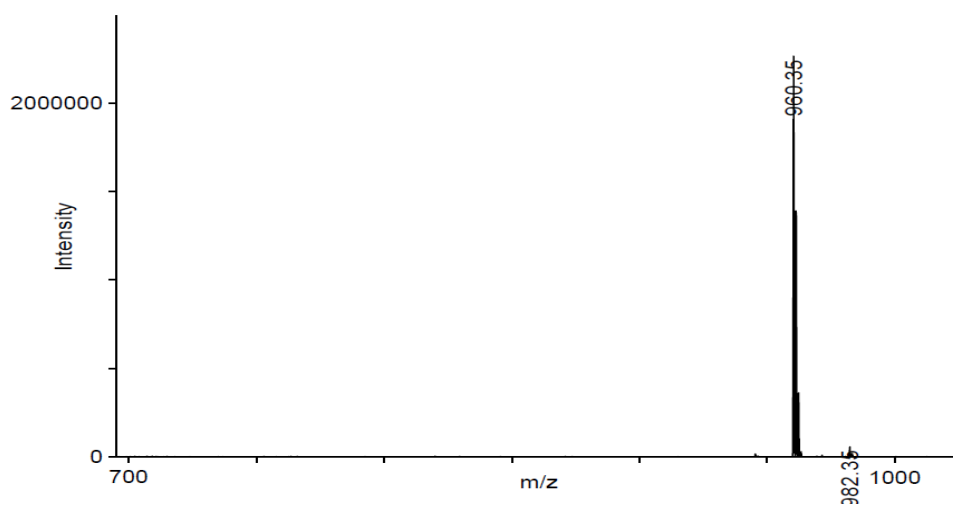



### 12 Lys-Nle

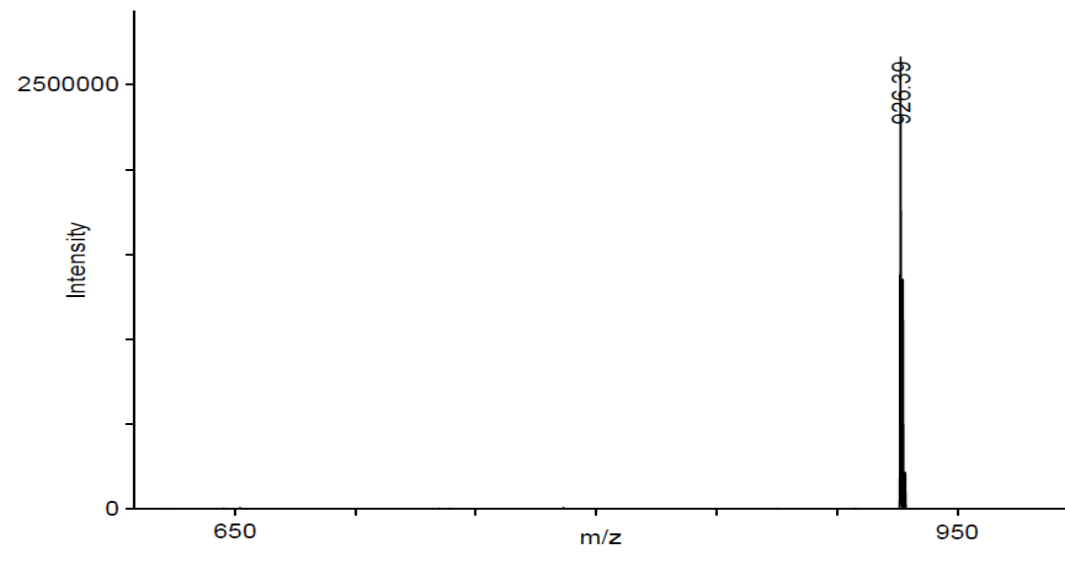

### 12 Trp-D-Thr

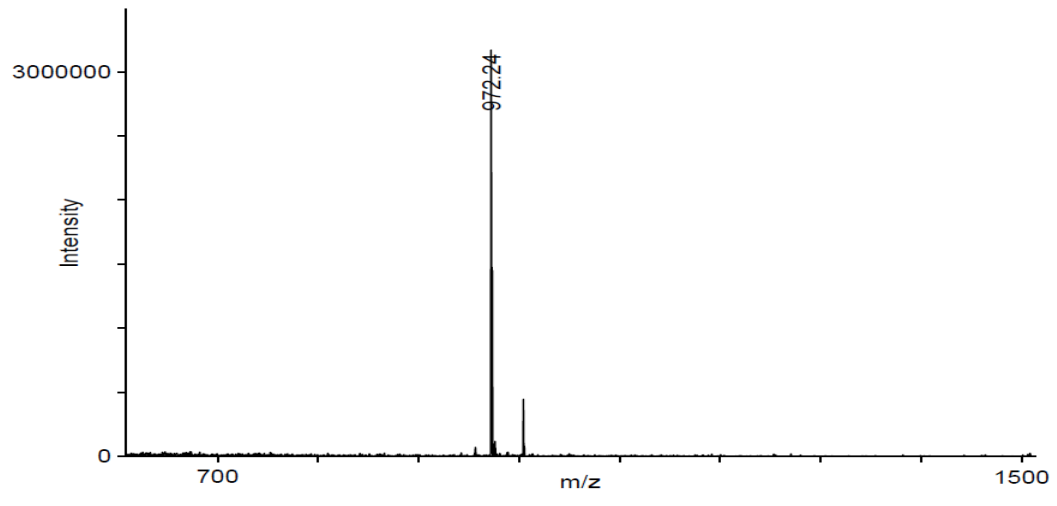

### 12 Trp-Gly

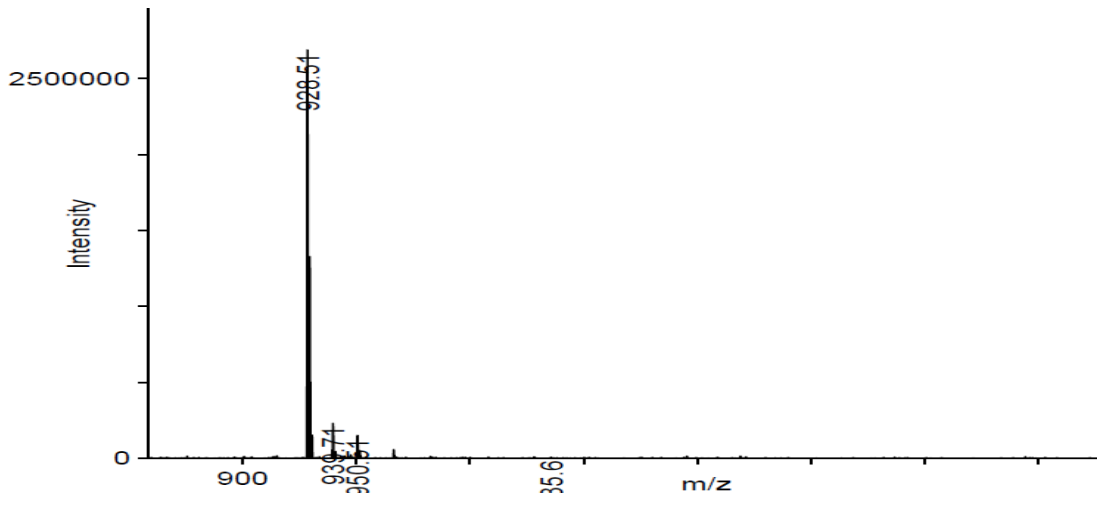

### 12 Trp-Ala

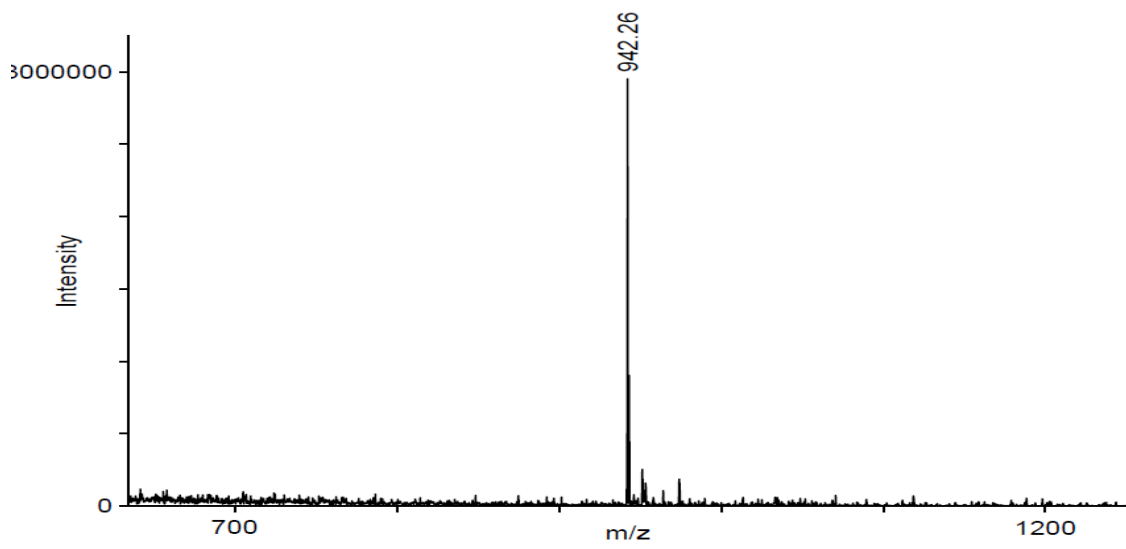

### 12 Trp-D-Val

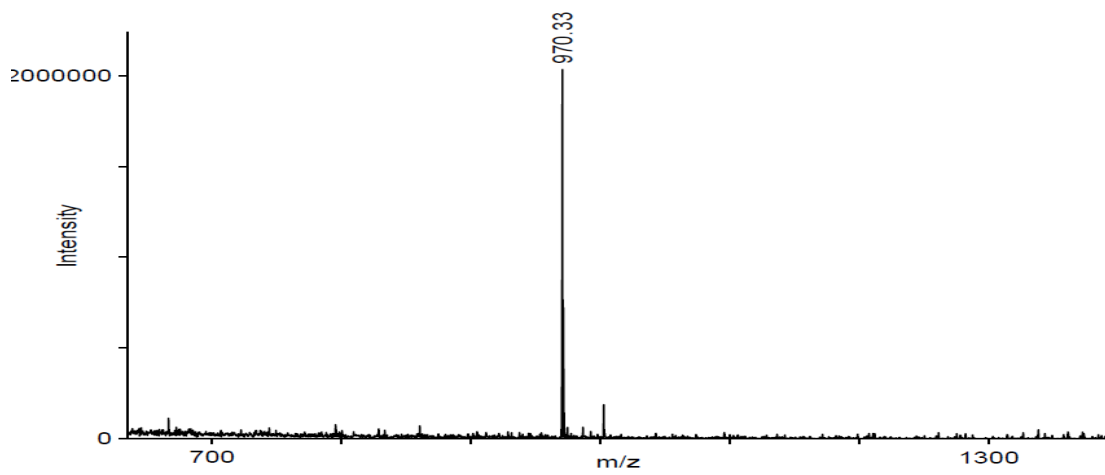

### 12 Trp-Pro

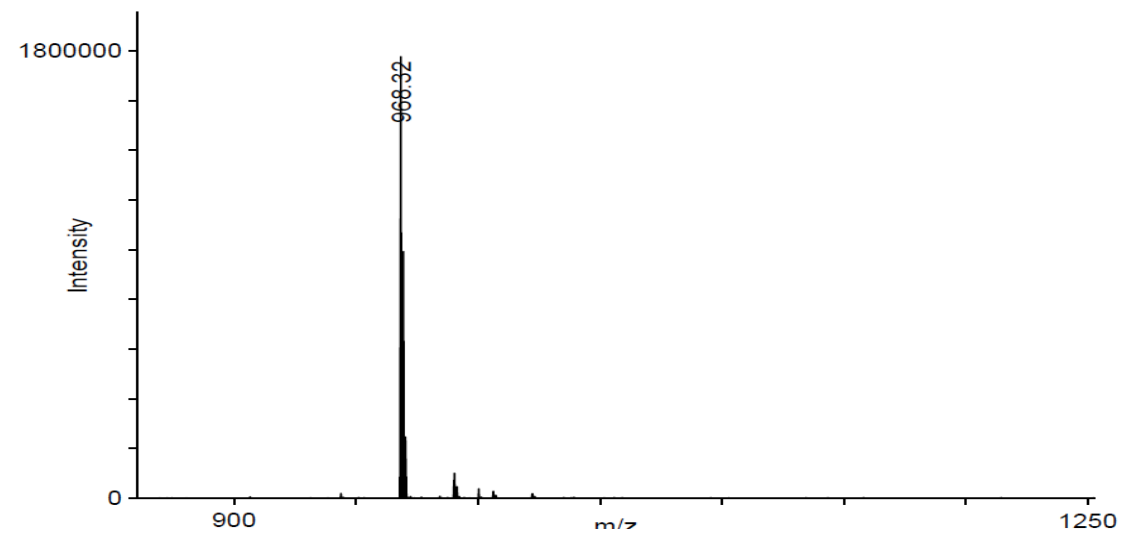

### 12 Trp-Lys

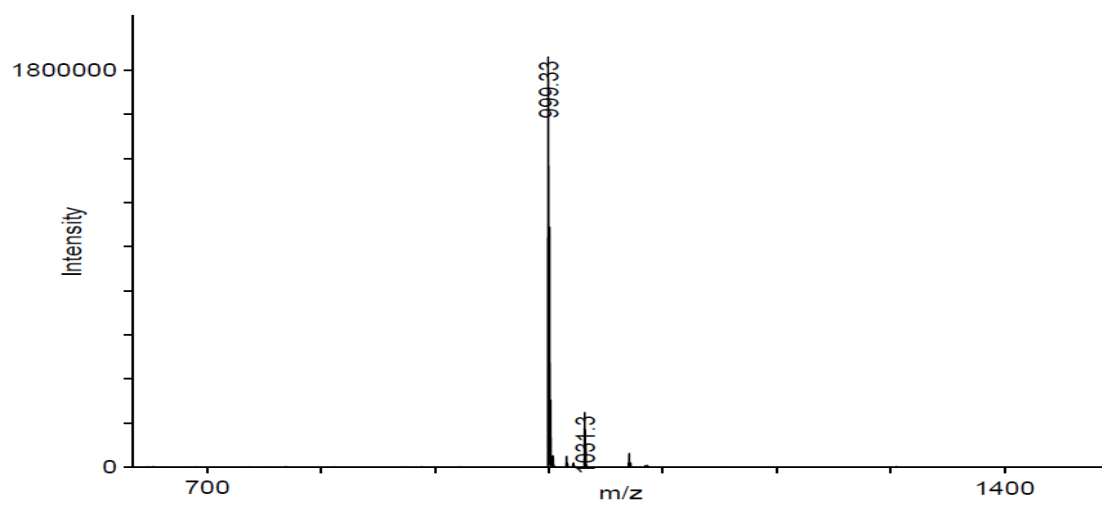

### 12 Trp-Asp

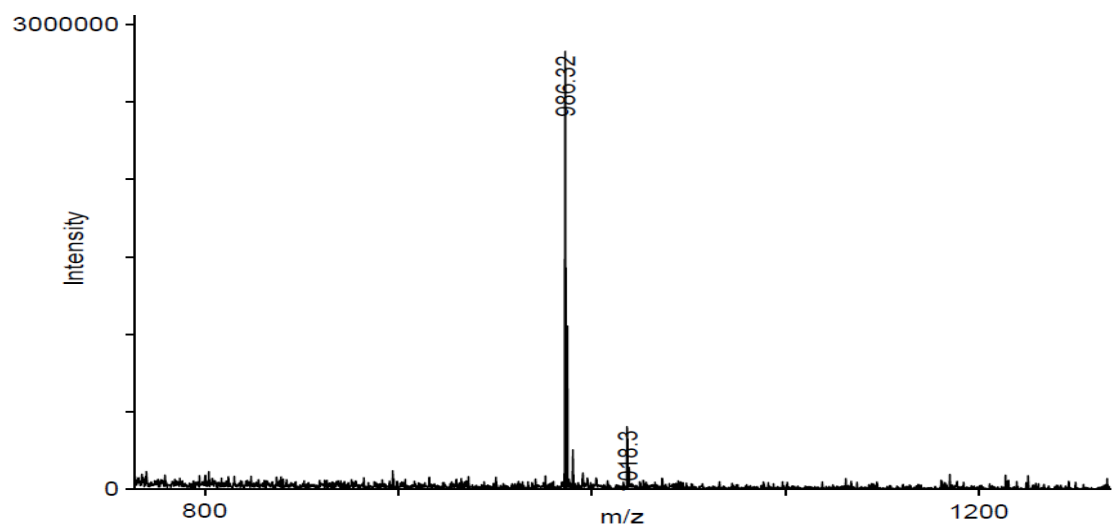

### 12 Trp-D-Phe

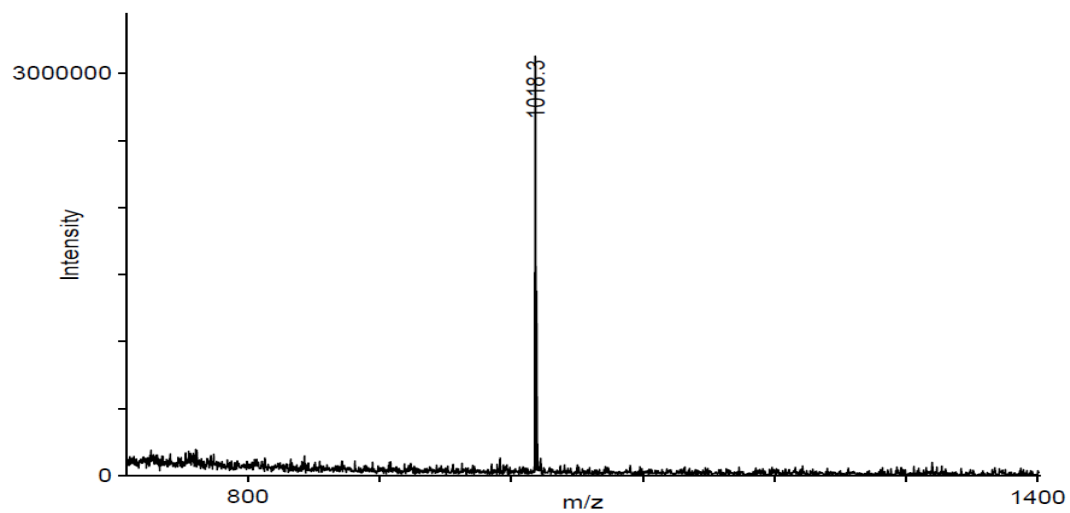

### 12 Trp-Nle

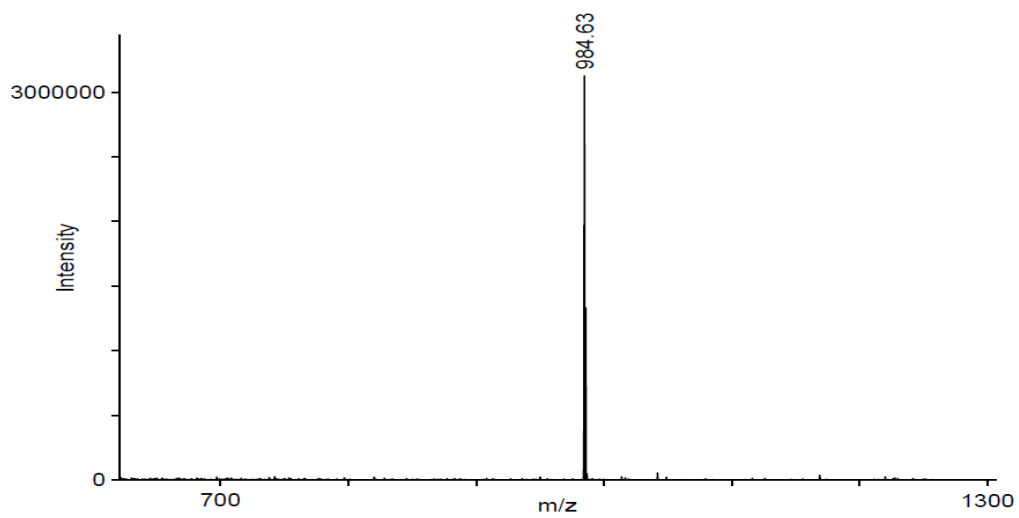

### 12 Asp-D-Thr

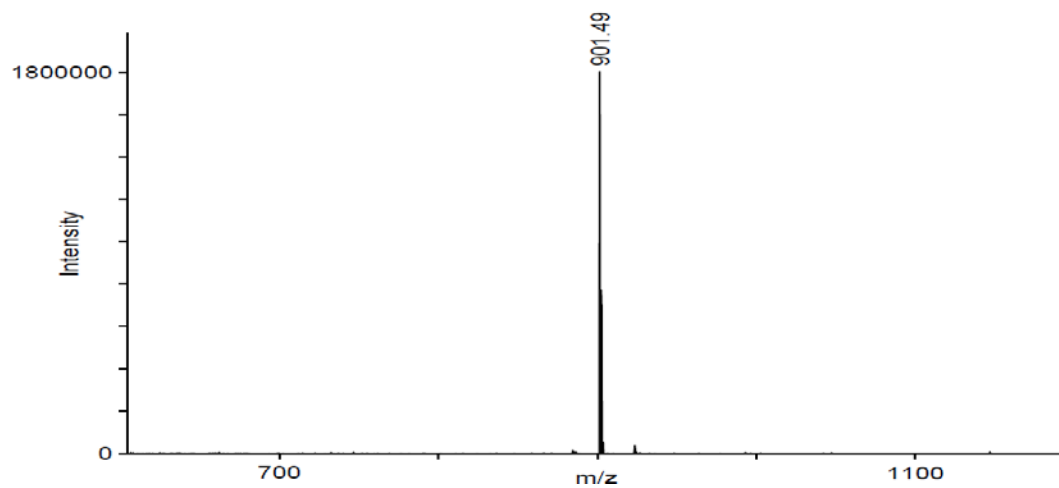

### 12 Asp-Gly

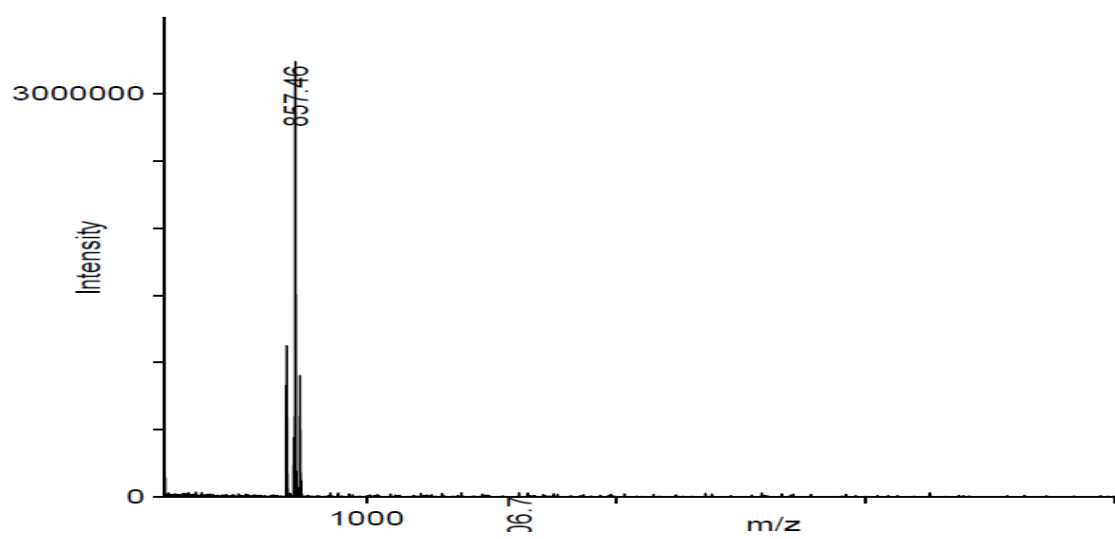

### 12 Asp-Ala (12a)

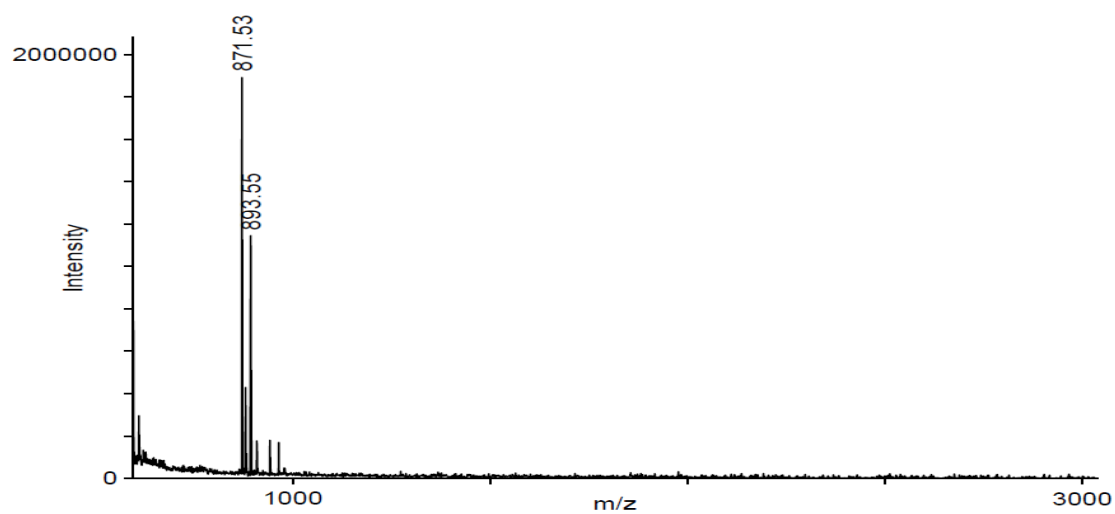

### 12 Asp-D-Val

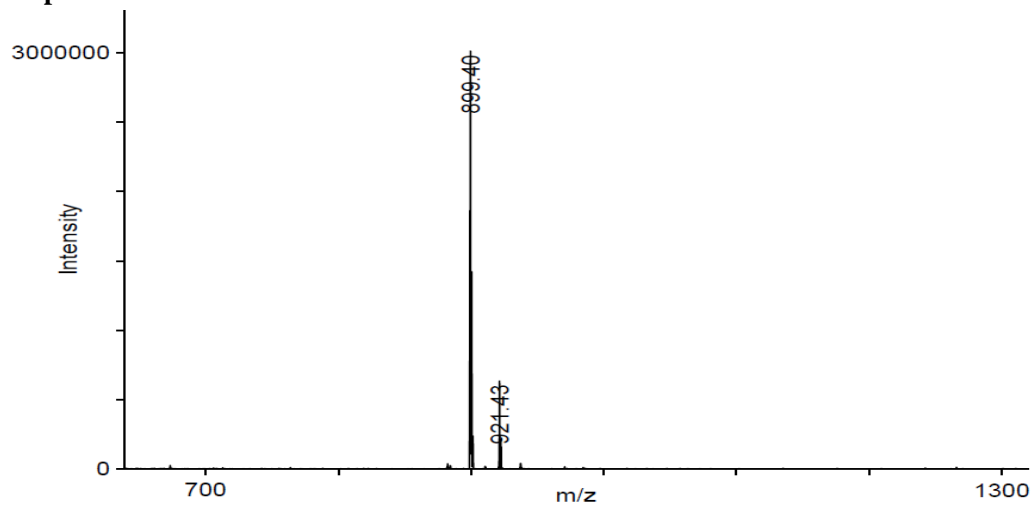

### 12 Asp-Pro

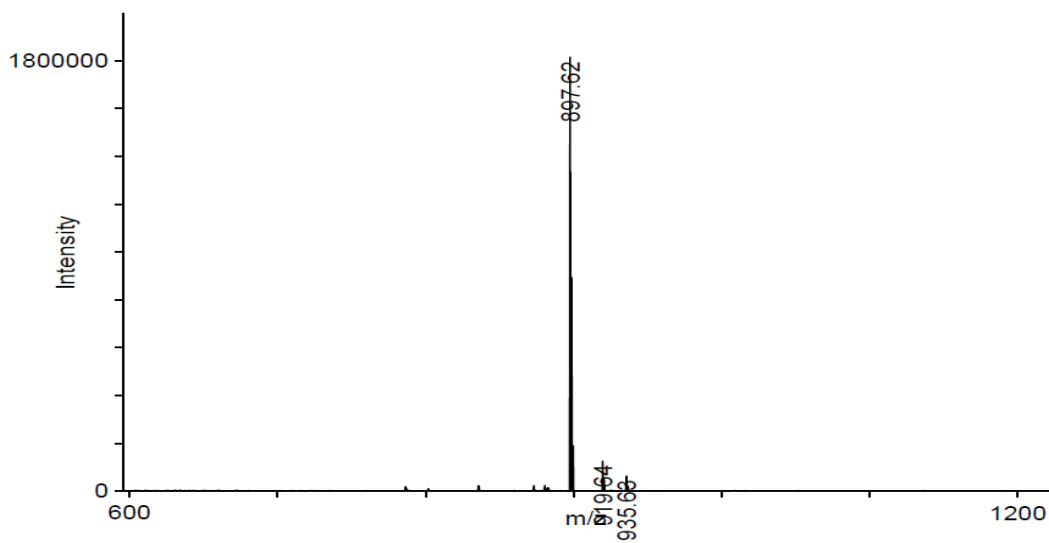

### 12 Asp-Lys

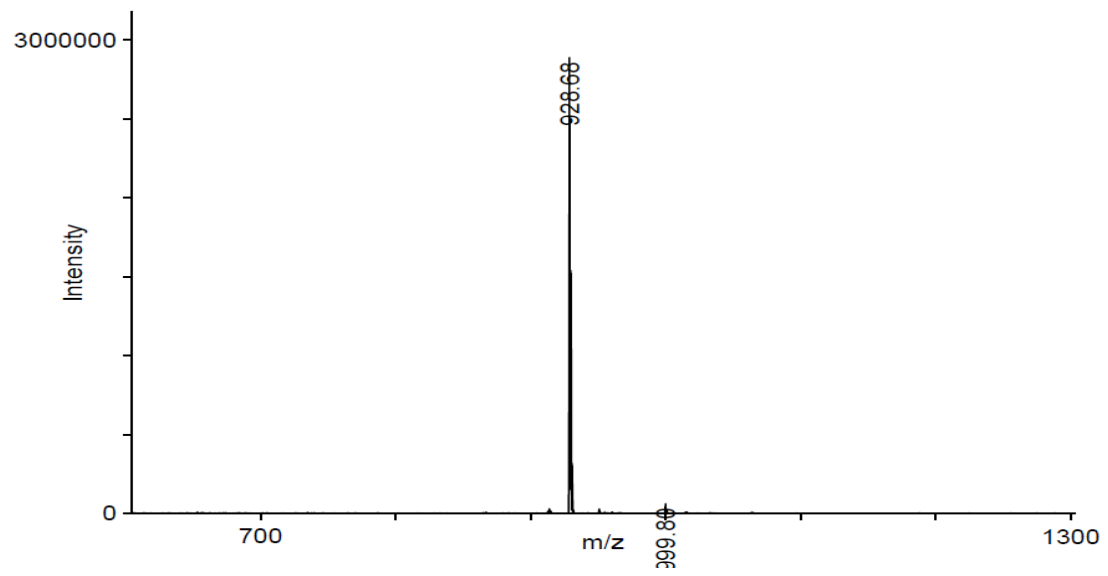

### 12 Asp-Asp

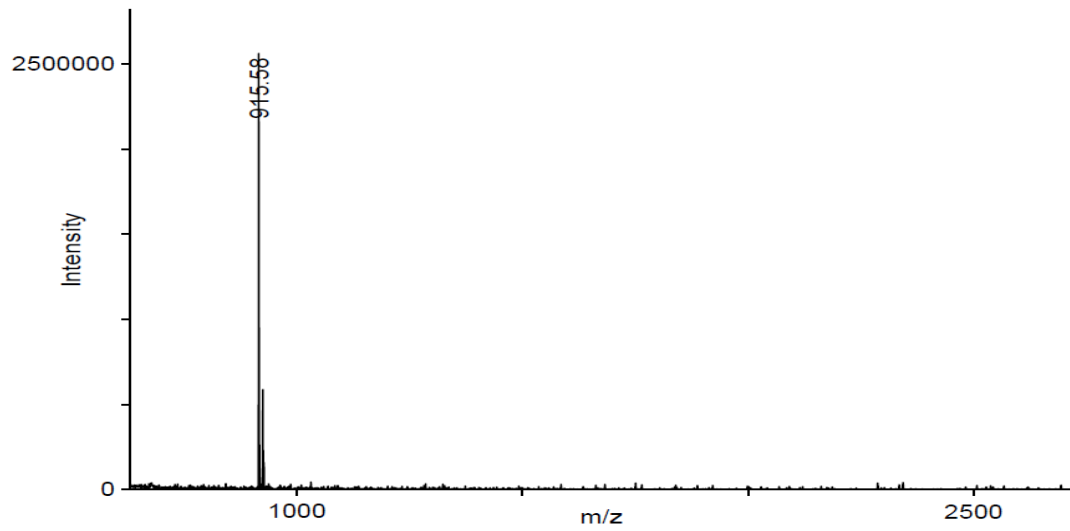

### 12 Asp-D-Phe

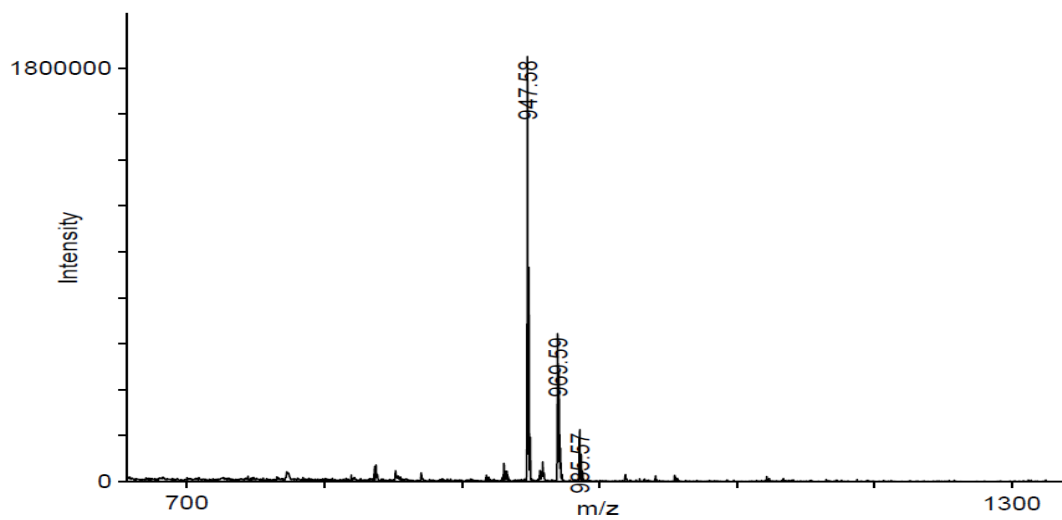

### 12 Asp-Nle

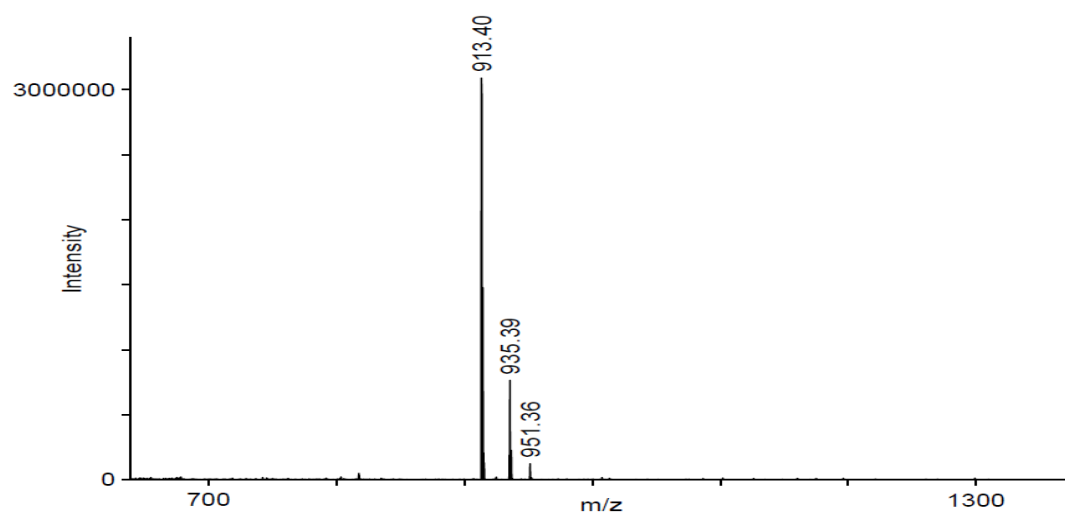

### 12 D-Phe-D-Thr

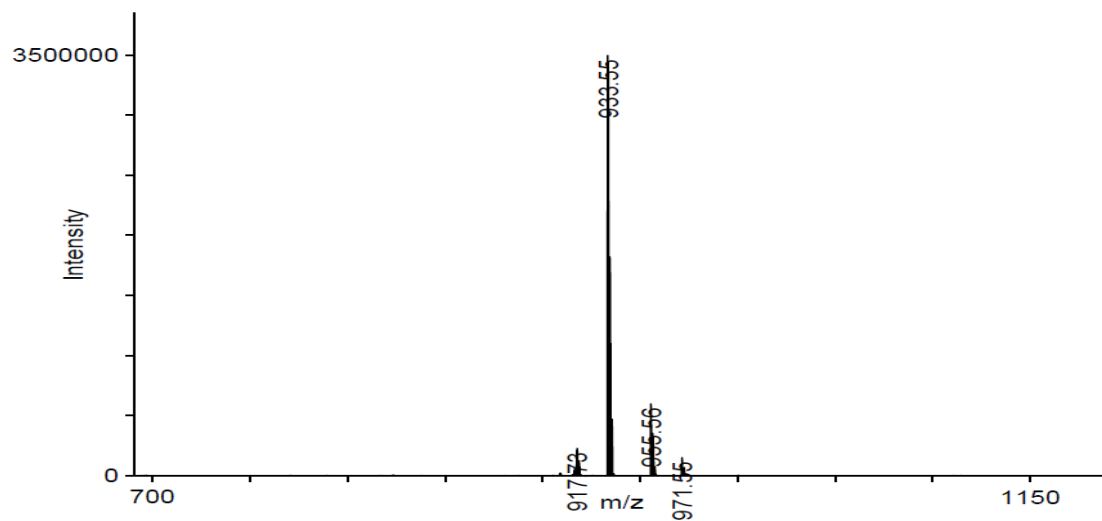

### 12 D-Phe-Gly

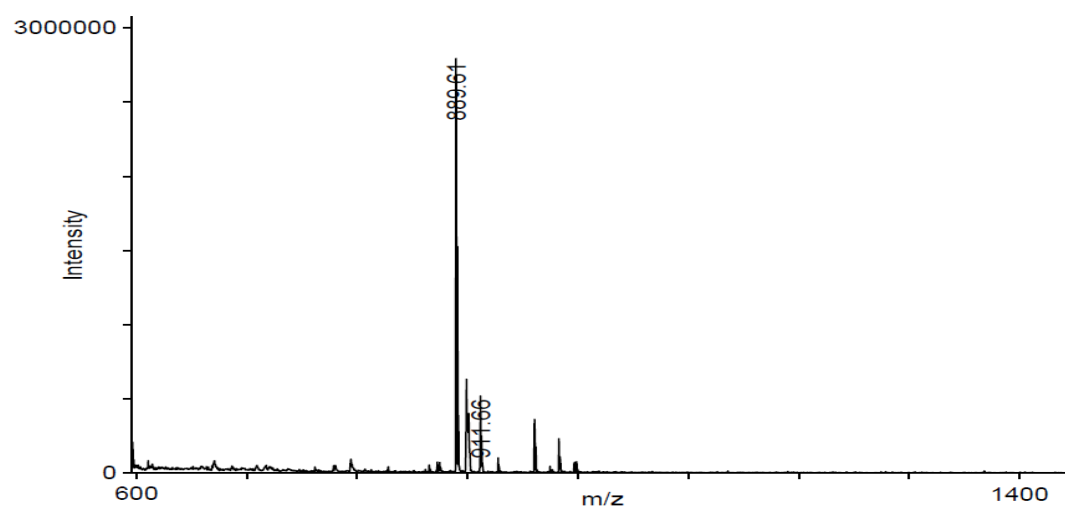

### 12 D-Phe-Ala

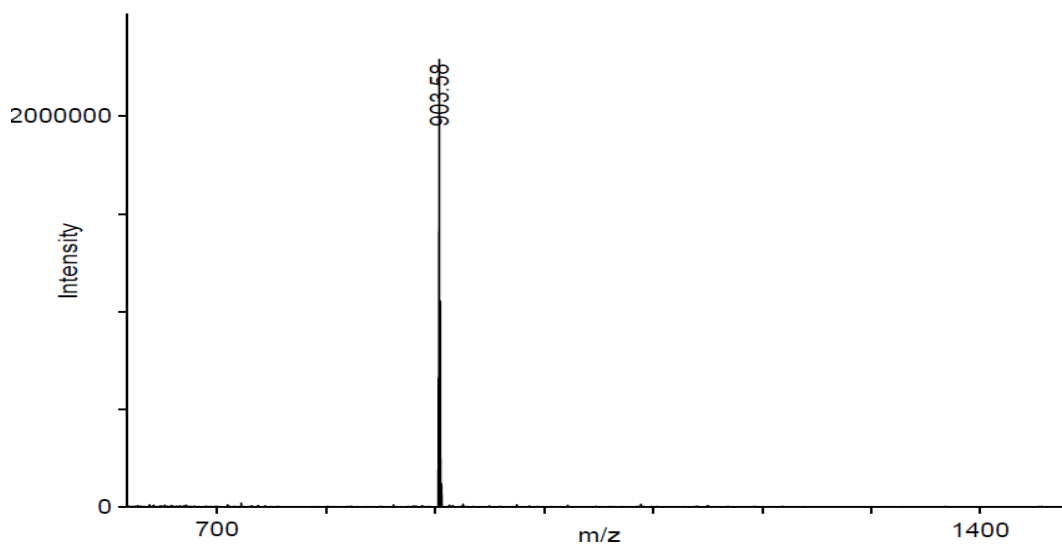

### 12 D-Phe-D-Val

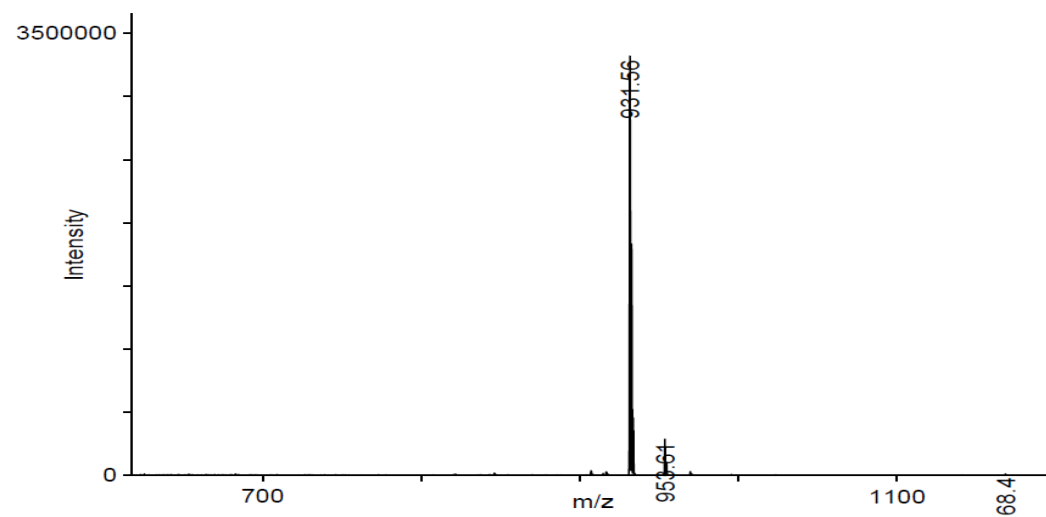

### 12 D-Phe-Pro

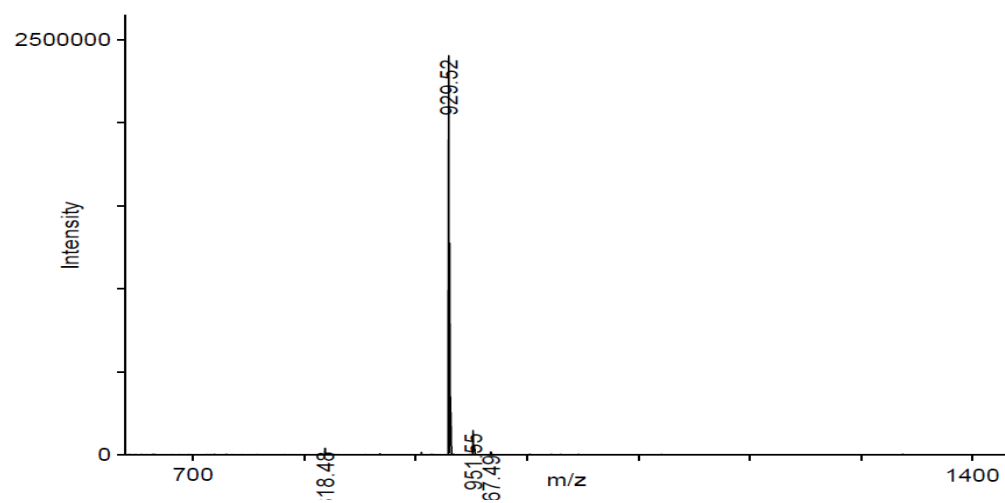



### 12 D-Phe-Lys

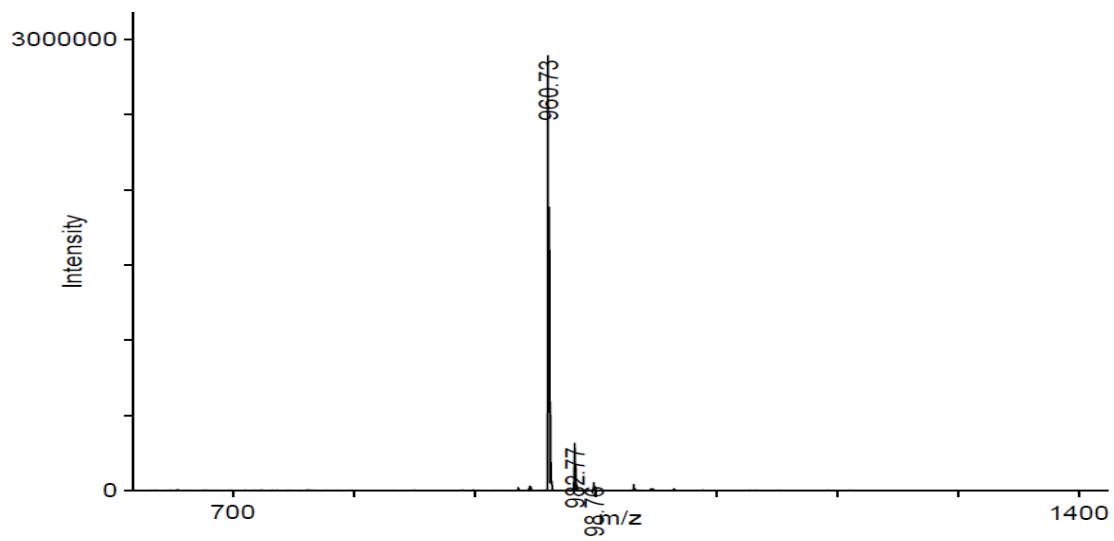

### 12 D-Phe-Trp

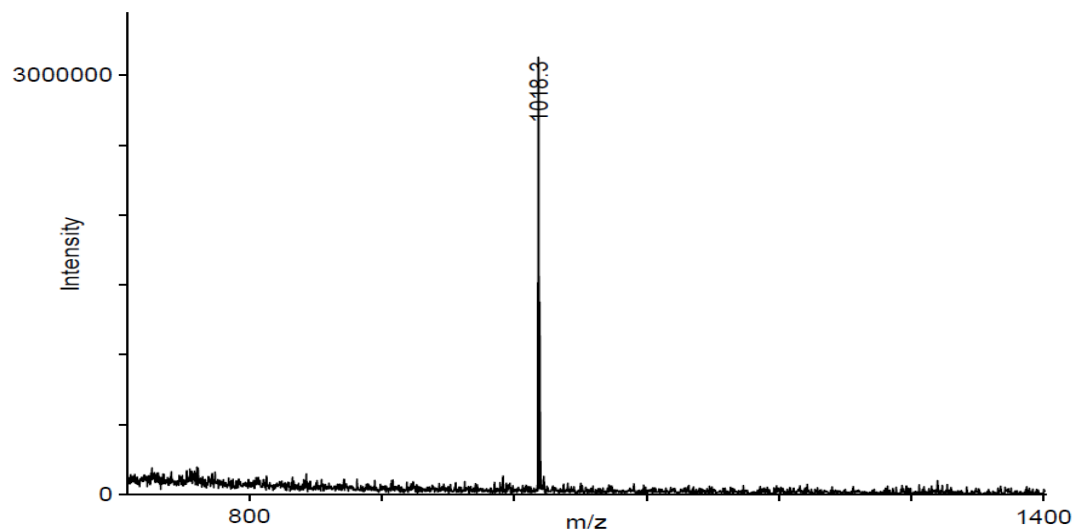

### 12 D-Phe-Asp

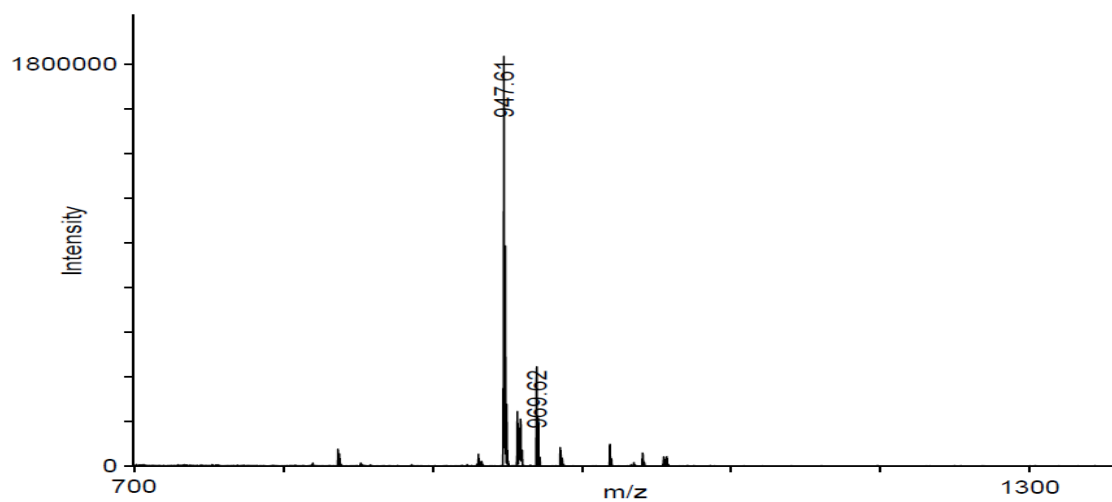

### 12 D-Phe-D-Phe

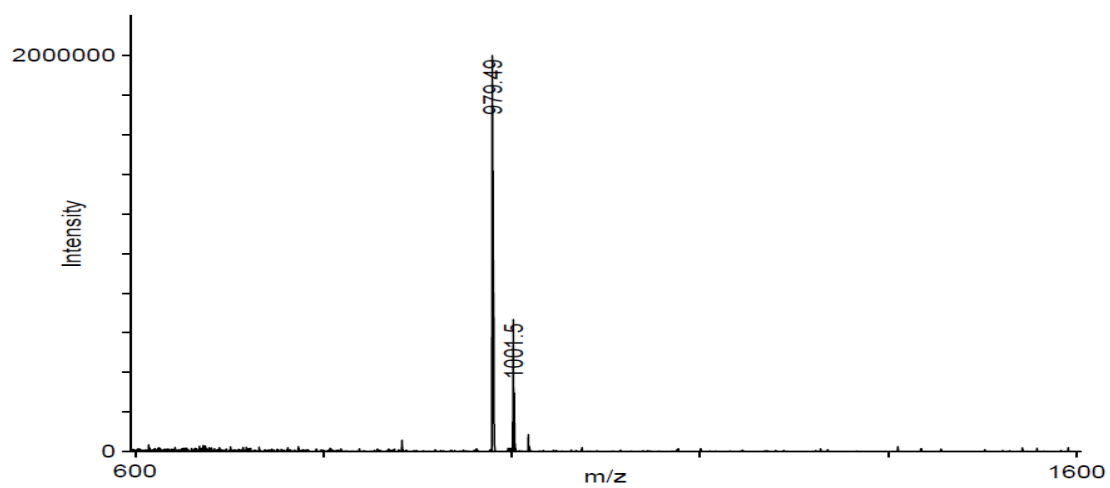

### 12 D-Phe-Nle

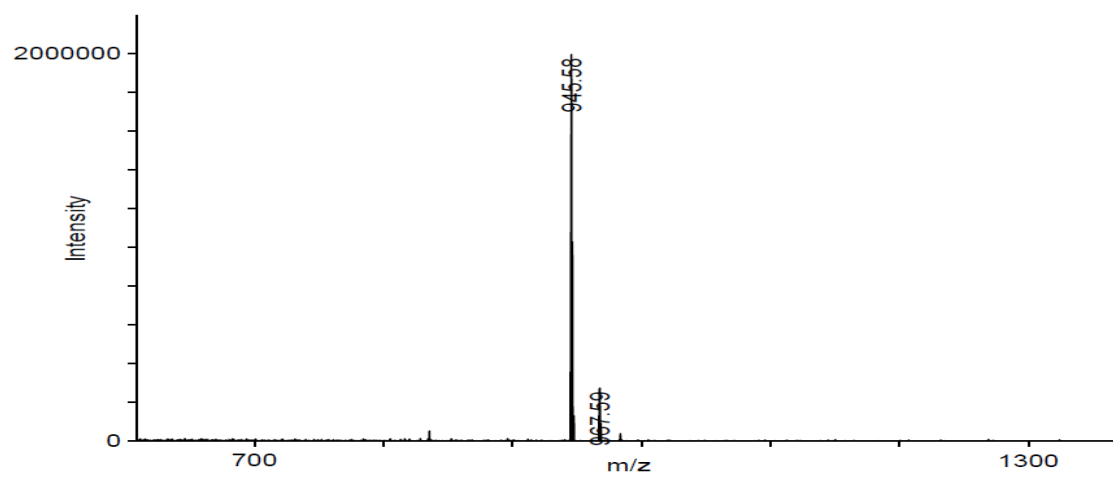

### 12 Nle-D-Thr

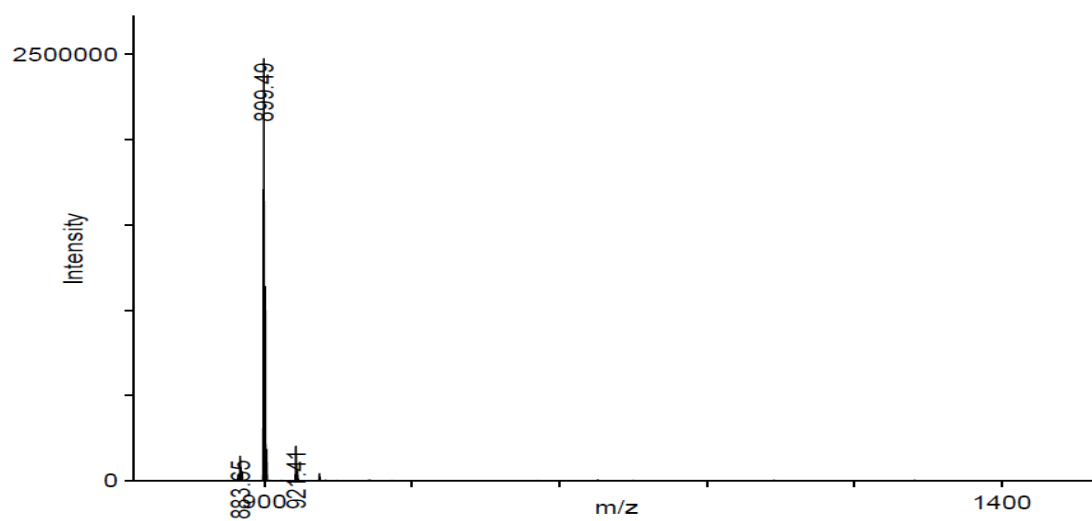

### 12 Nle-Gly

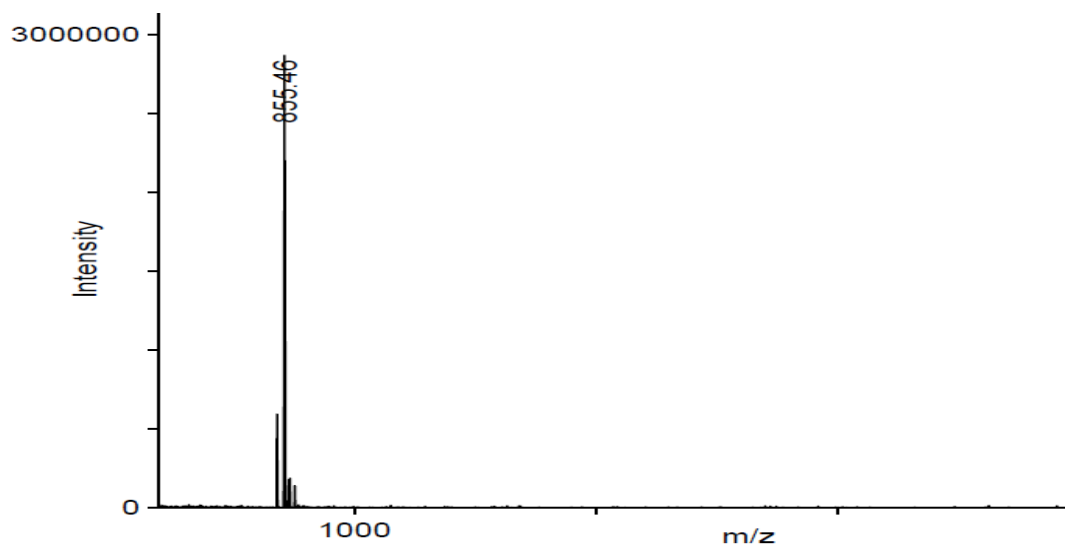

### 12 Nle-Ala

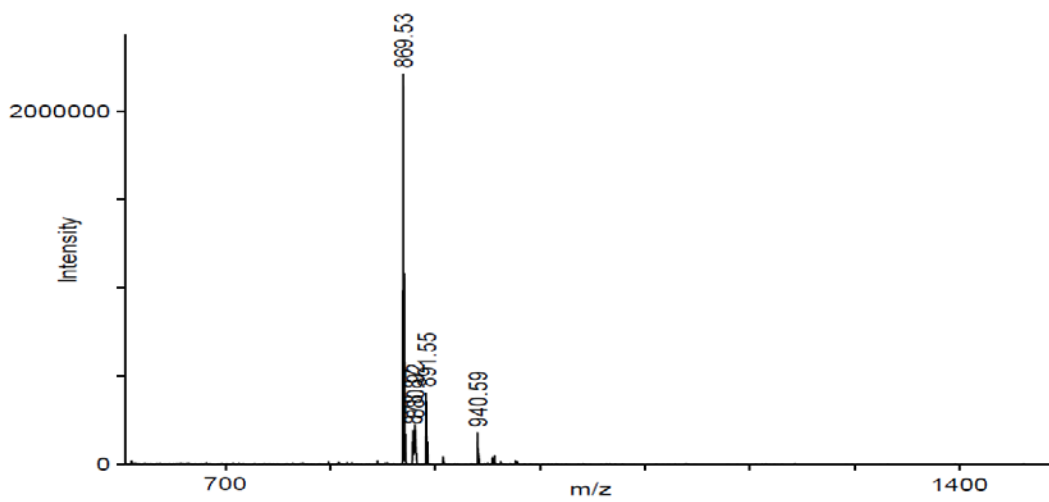

### 12 Nle-D-Val

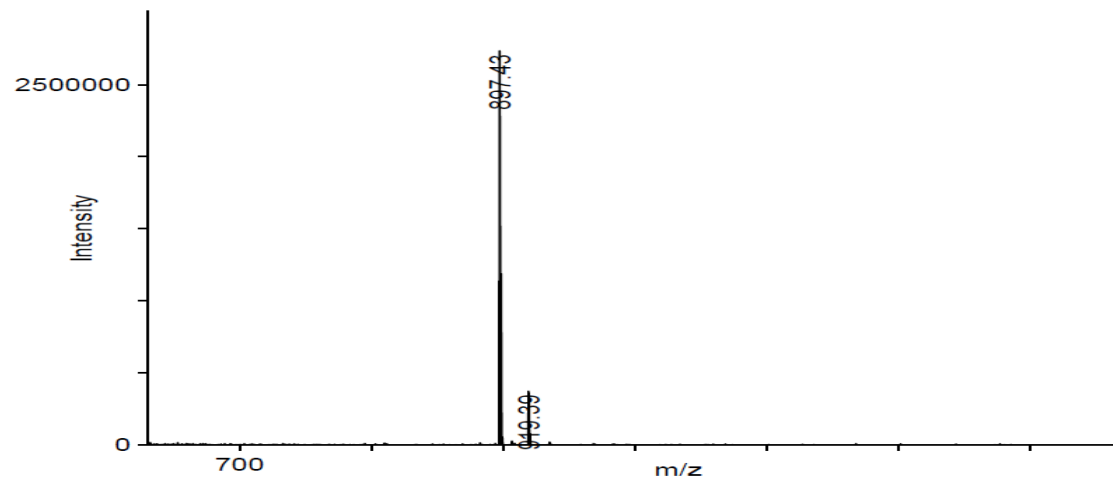

### 12 Nle-Pro

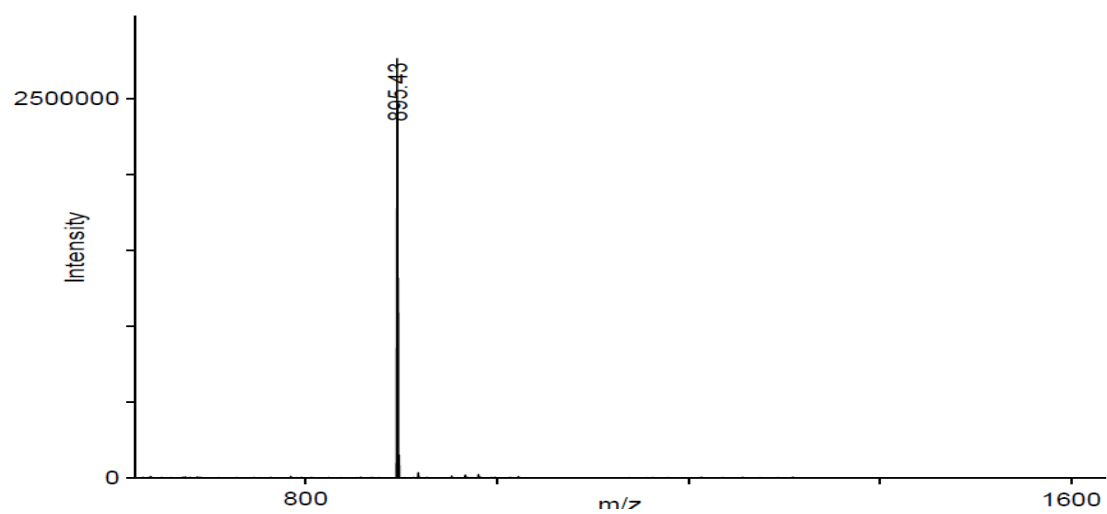

### 12 Nle-Lys

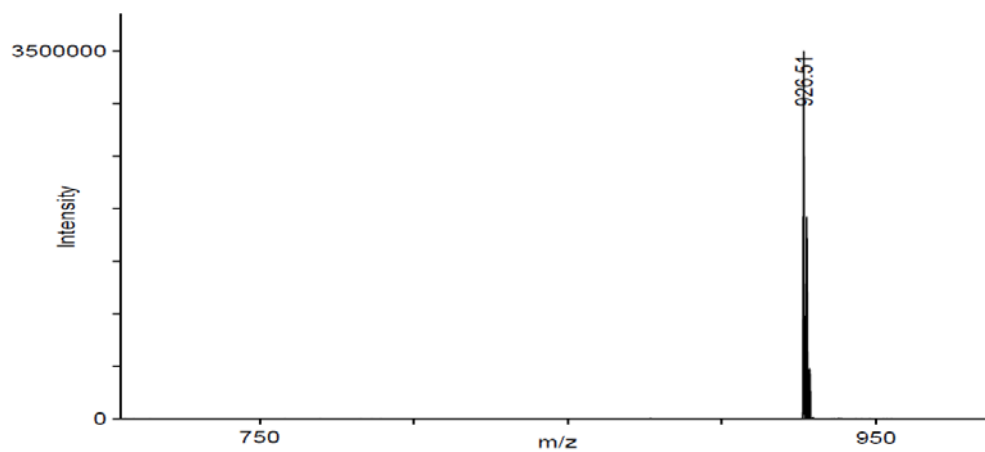

### 12 Nle-Trp

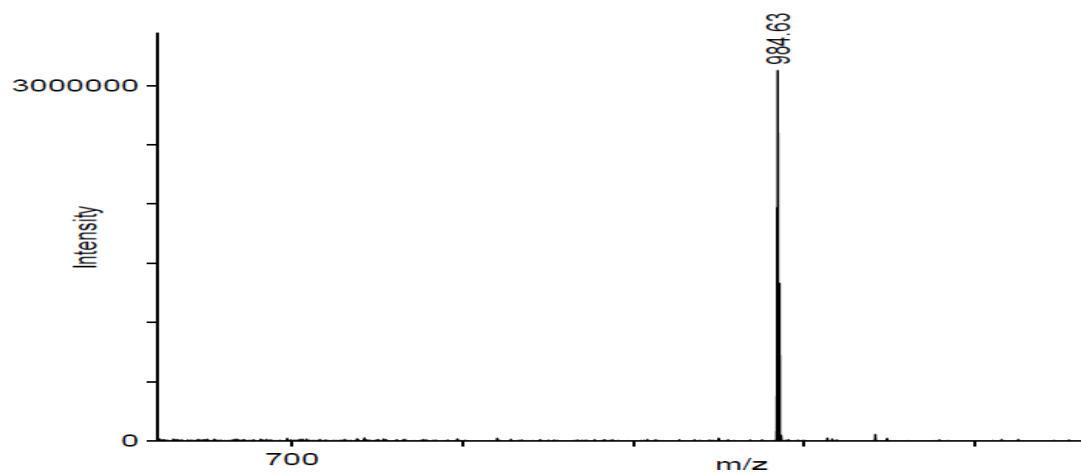

### 12 Nle-Asp

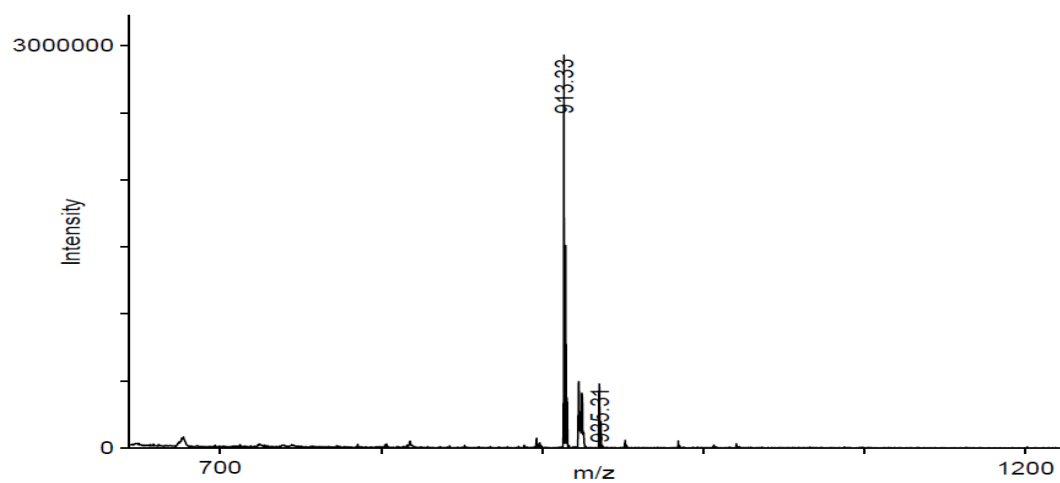

### 12 Nle-D-Phe

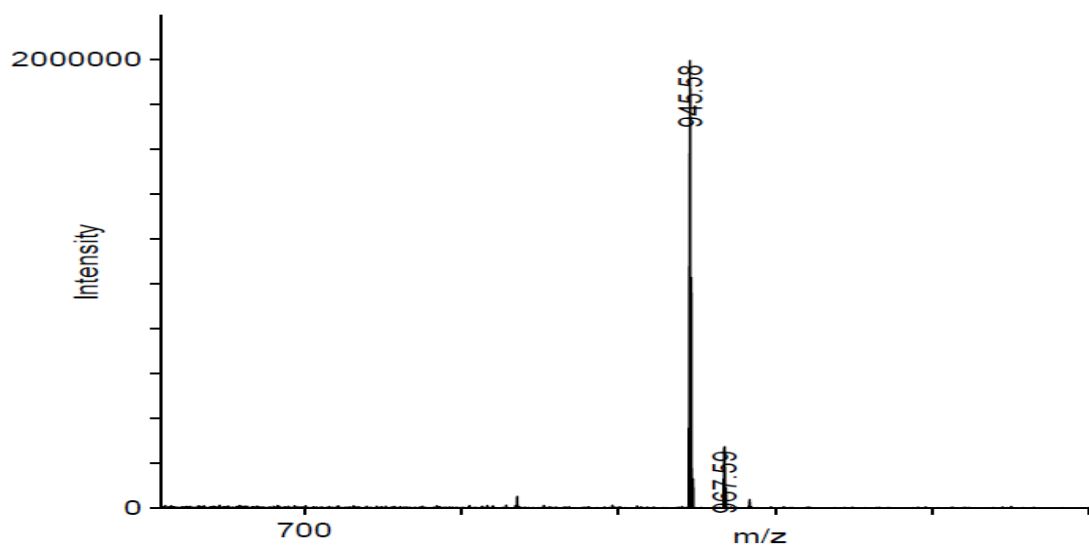

### 12 Nle-Nle

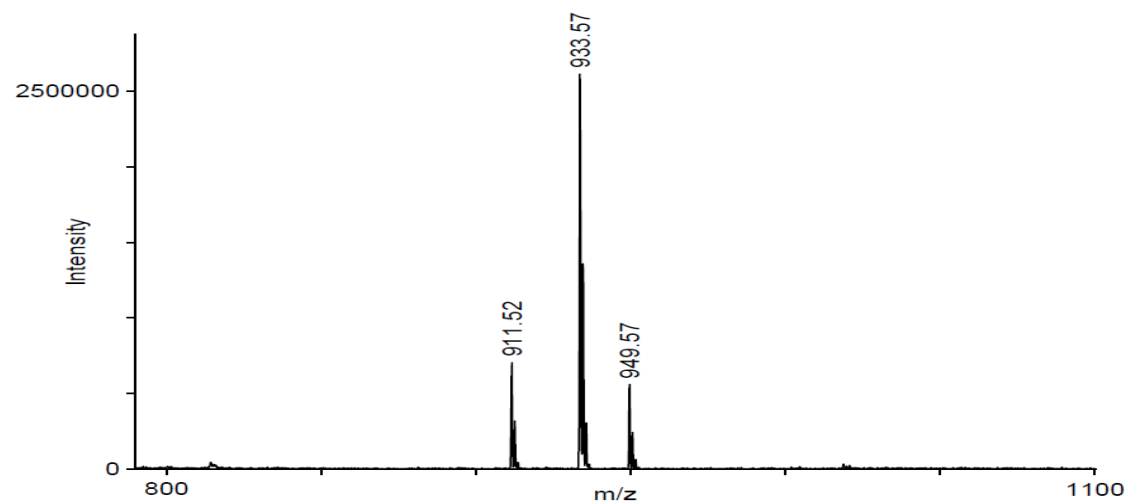

(911 MW+H<sup>+</sup>, 933 MW+Na<sup>+</sup>, 949 MW+K<sup>+</sup>)

**Figure S5.** Additional representative titration curves derived from fluorescence anisotropy (FA) competition assay of rapalogs. The percentage of FA was plotted against the rapalog concentration.

**Compound 11 (D-Thr-D-Thr)**

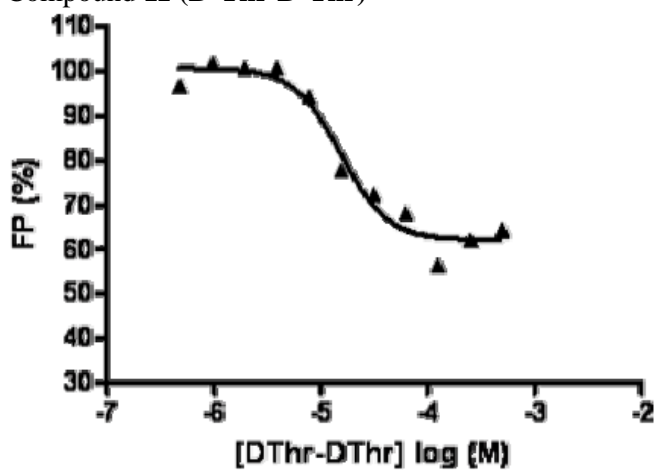

**Compound 11 (D-Thr-Pro)**

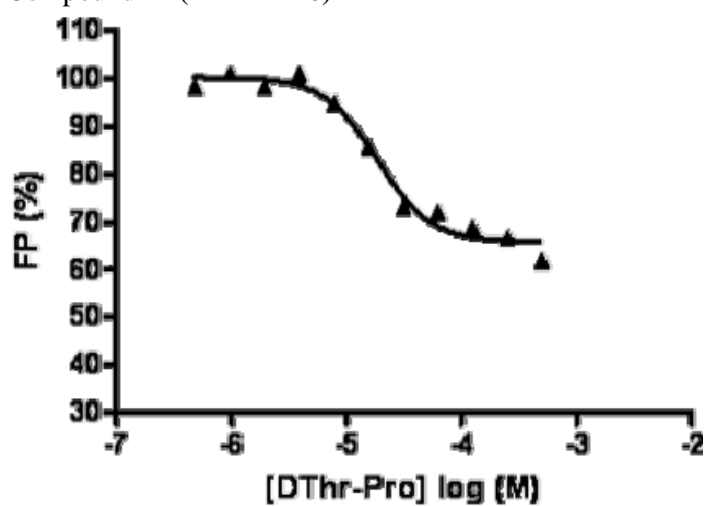

**Compound 11 (D-Thr-Asp)**

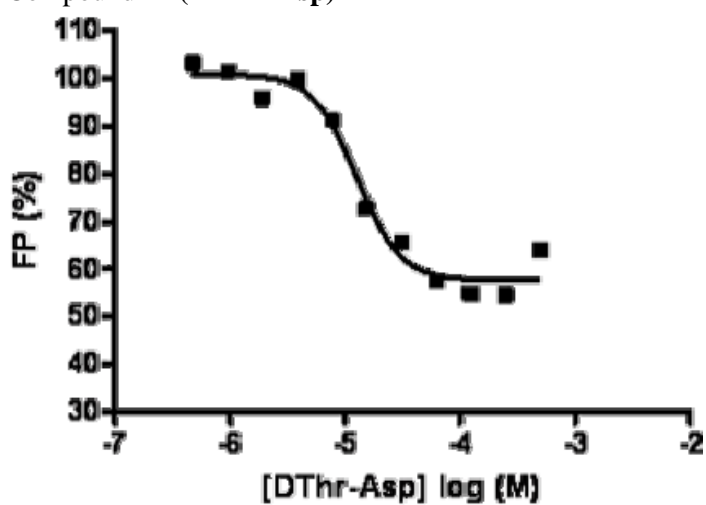

Compound 11 (D-Thr-Gly)

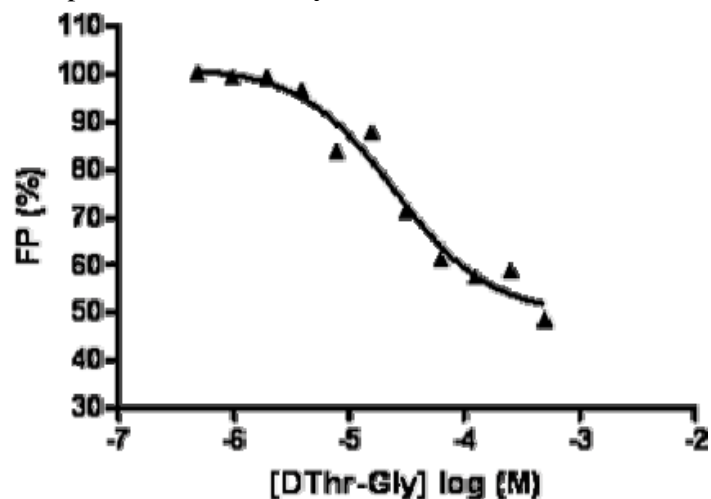

Compound 12 (D-Thr-Gly)

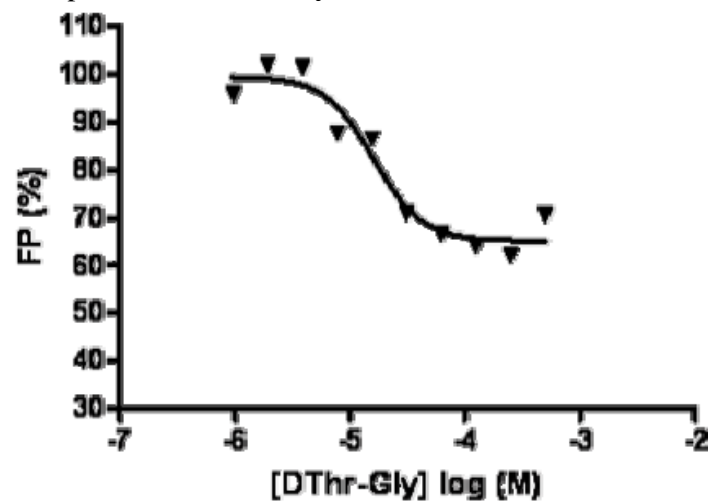

Compound 12 (D-Thr-Asp)

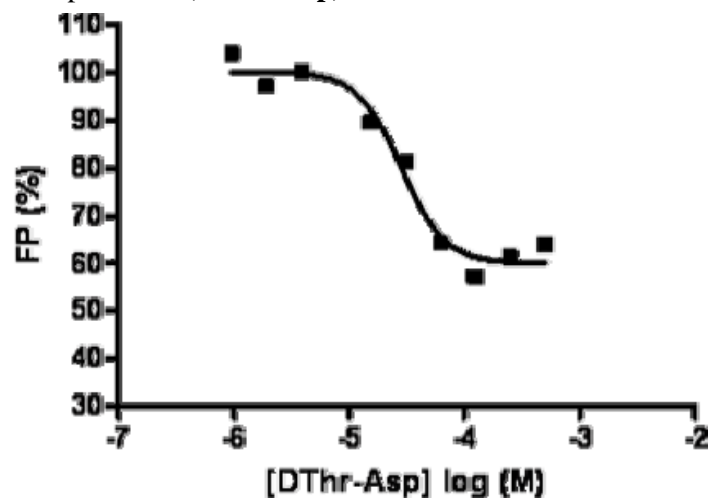

Compound 12 (D-Thr-Pro)

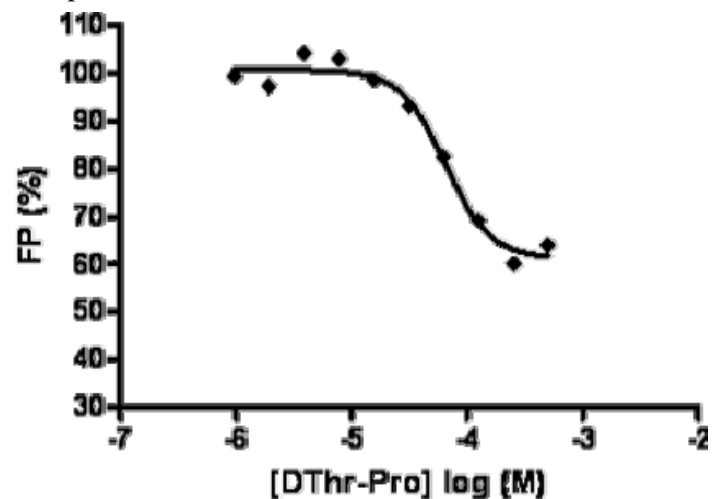

Compound 12 (D-Thr-Trp)

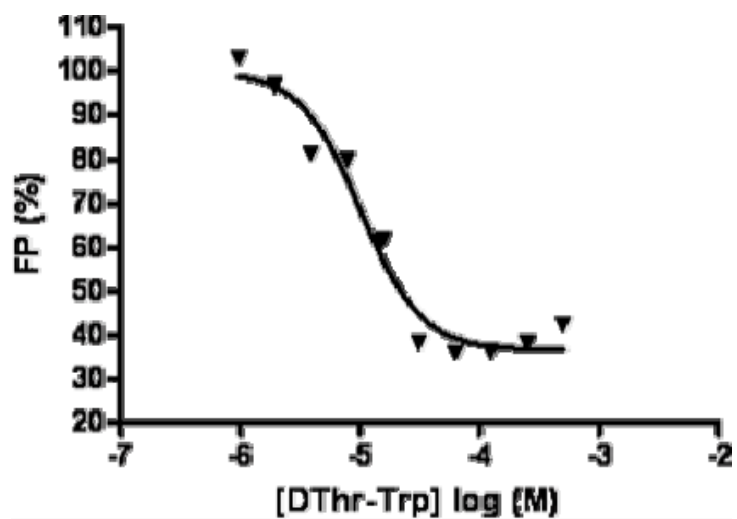

Supplement: NIHMS314711-supplement-1_si_001.pdf [file NIHMS314711-supplement-1_si_001.pdf]
